# Supplementary material for: Molecular Mechanisms of Bortezomib Resistant Adenocarcinoma Cells
Source: PLoS One. 2011 Dec 22;6(12):e27996. doi: 10.1371/journal.pone.0027996 (PMC3245226; doi:10.1371/journal.pone.0027996)
Supplement: Table S2 — Fold Change of Genes Expressed in Wild-type and/or Resistant Cell Lines Related to Proteasome Function or Drug Resistance. (XLSX) [file pone.0027996.s007.xlsx]

## Sheet: Table S2
Table S2 - Fold Change of Genes Expressed in Wild-type and/or Resistant Cell Lines Related to Proteasome Function or Drug Resistance
Gene Symbol	Entrez Gene	Probe Set ID	BR100 Fold Change (Log2)	BR200 Fold Change (Log2)	Gene Ontology Biological Process	Gene Ontology Cellular Component	Gene Ontology Molecular Function	Alignments
ABCB10	23456	223320_s_at	1.26738	0.88411	0006810 // transport // non-traceable author statement /// 0006810 // transport // inferred from electronic annotation	0005739 // mitochondrion // inferred from electronic annotation /// 0005743 // mitochondrial inner membrane // inferred from electronic annotation /// 0016020 // membrane // inferred from electronic annotation /// 0016021 // integral to membrane // inferred from electronic annotation /// 0043190 // ATP-binding cassette (ABC) transporter complex // non-traceable author statement	0000166 // nucleotide binding // inferred from electronic annotation /// 0005524 // ATP binding // non-traceable author statement /// 0005524 // ATP binding // inferred from electronic annotation /// 0016887 // ATPase activity // inferred from electronic annotation /// 0017111 // nucleoside-triphosphatase activity // inferred from electronic annotation /// 0042626 // ATPase activity, coupled to t…	chr15_random:285337-286052 (+) // 92.23 // /// chr15:26324566-26325281 (+) // 92.23 // q13.1 /// chr1:227719053-227719763 (-) // 97.46 // q42.13 /// chr15:20240873-20241588 (-) // 92.23 // q11.2 /// chr15:26549304-26550019 (-) // 92.23 // q13.1
ABCB6	10058	203192_at	0.566541	0.591042	0006810 // transport // inferred from direct assay /// 0006810 // transport // inferred from electronic annotation /// 0006879 // cellular iron ion homeostasis // non-traceable author statement	0005739 // mitochondrion // inferred from direct assay /// 0005739 // mitochondrion // inferred from electronic annotation /// 0005740 // mitochondrial envelope // inferred from direct assay /// 0005741 // mitochondrial outer membrane // inferred from electronic annotation /// 0016020 // membrane // inferred from electronic annotation /// 0016021 // integral to membrane // inferred from electroni…	0000166 // nucleotide binding // inferred from electronic annotation /// 0005524 // ATP binding // inferred from direct assay /// 0005524 // ATP binding // inferred from electronic annotation /// 0016887 // ATPase activity // inferred from electronic annotation /// 0017111 // nucleoside-triphosphatase activity // inferred from electronic annotation /// 0042626 // ATPase activity, coupled to trans…	chr2:219782737-219791916 (-) // 99.16 // q35
ABCB7	22	209620_s_at	1.09927	1.28435	0006810 // transport // traceable author statement /// 0006810 // transport // inferred from electronic annotation /// 0006879 // cellular iron ion homeostasis // inferred from electronic annotation	0005739 // mitochondrion // inferred from electronic annotation /// 0005743 // mitochondrial inner membrane // traceable author statement /// 0005743 // mitochondrial inner membrane // inferred from electronic annotation /// 0016020 // membrane // inferred from electronic annotation /// 0016021 // integral to membrane // inferred from electronic annotation	0000166 // nucleotide binding // inferred from electronic annotation /// 0005524 // ATP binding // traceable author statement /// 0005524 // ATP binding // inferred from electronic annotation /// 0015232 // heme transporter activity // traceable author statement /// 0016887 // ATPase activity // inferred from electronic annotation /// 0017111 // nucleoside-triphosphatase activity // inferred from…	chrX:74189840-74292840 (-) // 97.39 // q13.3
ABCB8	11194	229539_at	-0.0415852	-0.182082	0006810 // transport // traceable author statement /// 0006810 // transport // inferred from electronic annotation	0005624 // membrane fraction // traceable author statement /// 0005739 // mitochondrion // inferred from electronic annotation /// 0005740 // mitochondrial envelope // traceable author statement /// 0005743 // mitochondrial inner membrane // inferred from electronic annotation /// 0016020 // membrane // inferred from electronic annotation /// 0016021 // integral to membrane // inferred from elect…	0000166 // nucleotide binding // inferred from electronic annotation /// 0005215 // transporter activity // traceable author statement /// 0005524 // ATP binding // traceable author statement /// 0005524 // ATP binding // inferred from electronic annotation /// 0016887 // ATPase activity // inferred from electronic annotation /// 0017111 // nucleoside-triphosphatase activity // inferred from elec…	chr7:150374920-150375802 (+) // 66.73 // q36.1
ABCB9	23457	1555323_at	-0.00652824	-0.00652824	0006810 // transport // inferred from electronic annotation /// 0006810 // transport // non-traceable author statement /// 0006810 // transport // traceable author statement /// 0006857 // oligopeptide transport // inferred from electronic annotation /// 0007283 // spermatogenesis // traceable author statement /// 0015031 // protein transport // inferred from electronic annotation	0005764 // lysosome // inferred from electronic annotation /// 0005765 // lysosomal membrane // inferred from electronic annotation /// 0005783 // endoplasmic reticulum // inferred from electronic annotation /// 0005789 // endoplasmic reticulum membrane // inferred from electronic annotation /// 0016020 // membrane // inferred from electronic annotation /// 0016021 // integral to membrane // non-…	0000166 // nucleotide binding // inferred from electronic annotation /// 0005215 // transporter activity // traceable author statement /// 0005524 // ATP binding // non-traceable author statement /// 0005524 // ATP binding // inferred from electronic annotation /// 0005524 // ATP binding // traceable author statement /// 0015198 // oligopeptide transporter activity // inferred from electronic ann…	chr12:121963257-122010761 (-) // 74.78 // q24.31
ABCC1	4363	202804_at	-0.142613	-0.0693058	0006810 // transport // traceable author statement /// 0006810 // transport // inferred from electronic annotation /// 0006810 // transport // non-traceable author statement /// 0042493 // response to drug // traceable author statement	0005624 // membrane fraction // traceable author statement /// 0005887 // integral to plasma membrane // traceable author statement /// 0005887 // integral to plasma membrane // inferred from electronic annotation /// 0016020 // membrane // inferred from electronic annotation /// 0016021 // integral to membrane // inferred from electronic annotation /// 0016021 // integral to membrane // non-trac…	0000166 // nucleotide binding // inferred from electronic annotation /// 0004409 // homoaconitate hydratase activity // non-traceable author statement /// 0005215 // transporter activity // traceable author statement /// 0005215 // transporter activity // inferred from electronic annotation /// 0005524 // ATP binding // traceable author statement /// 0005524 // ATP binding // inferred from electr…	chr16:15950934-16144415 (+) // 97.01 // p13.11
ABCC1	4363	202805_s_at	0.00876404	-0.00838704	0006810 // transport // traceable author statement /// 0006810 // transport // inferred from electronic annotation /// 0006810 // transport // non-traceable author statement /// 0042493 // response to drug // traceable author statement	0005624 // membrane fraction // traceable author statement /// 0005887 // integral to plasma membrane // traceable author statement /// 0005887 // integral to plasma membrane // inferred from electronic annotation /// 0016020 // membrane // inferred from electronic annotation /// 0016021 // integral to membrane // inferred from electronic annotation /// 0016021 // integral to membrane // non-trac…	0000166 // nucleotide binding // inferred from electronic annotation /// 0004409 // homoaconitate hydratase activity // non-traceable author statement /// 0005215 // transporter activity // traceable author statement /// 0005215 // transporter activity // inferred from electronic annotation /// 0005524 // ATP binding // traceable author statement /// 0005524 // ATP binding // inferred from electr…	chr16:15950934-16143774 (+) // 97.86 // p13.11
ABCC10	89845	213485_s_at	0.485382	0.600995	0006810 // transport // inferred from electronic annotation	0005886 // plasma membrane // inferred from electronic annotation /// 0016020 // membrane // inferred from electronic annotation /// 0016021 // integral to membrane // inferred from electronic annotation	0000166 // nucleotide binding // inferred from electronic annotation /// 0005524 // ATP binding // inferred from electronic annotation /// 0016887 // ATPase activity // inferred from electronic annotation /// 0017111 // nucleoside-triphosphatase activity // inferred from electronic annotation /// 0042626 // ATPase activity, coupled to transmembrane movement of substances // inferred from electron…	chr6:43503269-43526138 (+) // 99.27 // p21.1
ABCC10	89845	215873_x_at	0.325313	0.360975	0006810 // transport // inferred from electronic annotation	0005886 // plasma membrane // inferred from electronic annotation /// 0016020 // membrane // inferred from electronic annotation /// 0016021 // integral to membrane // inferred from electronic annotation	0000166 // nucleotide binding // inferred from electronic annotation /// 0005524 // ATP binding // inferred from electronic annotation /// 0016887 // ATPase activity // inferred from electronic annotation /// 0017111 // nucleoside-triphosphatase activity // inferred from electronic annotation /// 0042626 // ATPase activity, coupled to transmembrane movement of substances // inferred from electron…	chr6:43511513-43526138 (+) // 89.62 // p21.1
ABCC13	150000	233371_at	0	0.00092951	0006810 // transport // inferred from electronic annotation	0005634 // nucleus // non-traceable author statement /// 0016020 // membrane // inferred from electronic annotation /// 0016021 // integral to membrane // inferred from electronic annotation	0005524 // ATP binding // inferred from electronic annotation /// 0042626 // ATPase activity, coupled to transmembrane movement of substances // inferred from electronic annotation	chr21:14568135-14593877 (+) // 99.8 // q11.2
ABCC3	8714	208161_s_at	-1.58576	-1.14962	0006810 // transport // traceable author statement /// 0006810 // transport // inferred from electronic annotation /// 0015722 // canalicular bile acid transport // inferred from electronic annotation	0005624 // membrane fraction // traceable author statement /// 0005887 // integral to plasma membrane // traceable author statement /// 0005887 // integral to plasma membrane // inferred from electronic annotation /// 0016020 // membrane // inferred from electronic annotation /// 0016021 // integral to membrane // inferred from electronic annotation	0000166 // nucleotide binding // inferred from electronic annotation /// 0005215 // transporter activity // inferred from electronic annotation /// 0005524 // ATP binding // traceable author statement /// 0005524 // ATP binding // inferred from electronic annotation /// 0008514 // organic anion transmembrane transporter activity // traceable author statement /// 0016887 // ATPase activity // infe…	chr17:46067226-46124061 (+) // 96.41 // q21.33
ABCC3	8714	209641_s_at	-1.74739	-1.44494	0006810 // transport // traceable author statement /// 0006810 // transport // inferred from electronic annotation /// 0015722 // canalicular bile acid transport // inferred from electronic annotation	0005624 // membrane fraction // traceable author statement /// 0005887 // integral to plasma membrane // traceable author statement /// 0005887 // integral to plasma membrane // inferred from electronic annotation /// 0016020 // membrane // inferred from electronic annotation /// 0016021 // integral to membrane // inferred from electronic annotation	0000166 // nucleotide binding // inferred from electronic annotation /// 0005215 // transporter activity // inferred from electronic annotation /// 0005524 // ATP binding // traceable author statement /// 0005524 // ATP binding // inferred from electronic annotation /// 0008514 // organic anion transmembrane transporter activity // traceable author statement /// 0016887 // ATPase activity // infe…	chr17:46067226-46123645 (+) // 99.48 // q21.33
ABCC3	8714	214979_at	-0.424807	-0.275478	0006810 // transport // traceable author statement /// 0006810 // transport // inferred from electronic annotation /// 0015722 // canalicular bile acid transport // inferred from electronic annotation	0005624 // membrane fraction // traceable author statement /// 0005887 // integral to plasma membrane // traceable author statement /// 0005887 // integral to plasma membrane // inferred from electronic annotation /// 0016020 // membrane // inferred from electronic annotation /// 0016021 // integral to membrane // inferred from electronic annotation	0000166 // nucleotide binding // inferred from electronic annotation /// 0005215 // transporter activity // inferred from electronic annotation /// 0005524 // ATP binding // traceable author statement /// 0005524 // ATP binding // inferred from electronic annotation /// 0008514 // organic anion transmembrane transporter activity // traceable author statement /// 0016887 // ATPase activity // infe…	chr17:46121881-46548092 (+) // 71.23 // q21.33
ABCC3	8714	230682_x_at	-0.863953	-0.598446	0006810 // transport // traceable author statement /// 0006810 // transport // inferred from electronic annotation /// 0015722 // canalicular bile acid transport // inferred from electronic annotation	0005624 // membrane fraction // traceable author statement /// 0005887 // integral to plasma membrane // traceable author statement /// 0005887 // integral to plasma membrane // inferred from electronic annotation /// 0016020 // membrane // inferred from electronic annotation /// 0016021 // integral to membrane // inferred from electronic annotation	0000166 // nucleotide binding // inferred from electronic annotation /// 0005215 // transporter activity // inferred from electronic annotation /// 0005524 // ATP binding // traceable author statement /// 0005524 // ATP binding // inferred from electronic annotation /// 0008514 // organic anion transmembrane transporter activity // traceable author statement /// 0016887 // ATPase activity // infe…	chr17:46110166-46110713 (+) // 97.33 // q21.33
ABCC3	8714	239217_x_at	0.552628	0.439422	0006810 // transport // traceable author statement /// 0006810 // transport // inferred from electronic annotation /// 0015722 // canalicular bile acid transport // inferred from electronic annotation	0005624 // membrane fraction // traceable author statement /// 0005887 // integral to plasma membrane // traceable author statement /// 0005887 // integral to plasma membrane // inferred from electronic annotation /// 0016020 // membrane // inferred from electronic annotation /// 0016021 // integral to membrane // inferred from electronic annotation	0000166 // nucleotide binding // inferred from electronic annotation /// 0005215 // transporter activity // inferred from electronic annotation /// 0005524 // ATP binding // traceable author statement /// 0005524 // ATP binding // inferred from electronic annotation /// 0008514 // organic anion transmembrane transporter activity // traceable author statement /// 0016887 // ATPase activity // infe…	chr17:46099910-46100287 (+) // 76.47 // q21.33
ABCC4	10257	1554918_a_at	0.639112	-0.386512	0006810 // transport // inferred from electronic annotation /// 0006811 // ion transport // inferred from electronic annotation	0005624 // membrane fraction // inferred from direct assay /// 0005886 // plasma membrane // inferred from direct assay /// 0016020 // membrane // inferred from electronic annotation /// 0016021 // integral to membrane // inferred from electronic annotation /// 0031088 // platelet dense granule membrane // inferred from direct assay	0000166 // nucleotide binding // inferred from electronic annotation /// 0005254 // chloride channel activity // inferred from electronic annotation /// 0005524 // ATP binding // inferred from electronic annotation /// 0016404 // 15-hydroxyprostaglandin dehydrogenase (NAD+) activity // non-traceable author statement /// 0016887 // ATPase activity // inferred from electronic annotation /// 0017111…	chr13:94458603-94751671 (-) // 89.48 // q32.1
ABCC4	10257	1555039_a_at	0.753953	0.382791	0006810 // transport // inferred from electronic annotation /// 0006811 // ion transport // inferred from electronic annotation	0005624 // membrane fraction // inferred from direct assay /// 0005886 // plasma membrane // inferred from direct assay /// 0016020 // membrane // inferred from electronic annotation /// 0016021 // integral to membrane // inferred from electronic annotation /// 0031088 // platelet dense granule membrane // inferred from direct assay	0000166 // nucleotide binding // inferred from electronic annotation /// 0005254 // chloride channel activity // inferred from electronic annotation /// 0005524 // ATP binding // inferred from electronic annotation /// 0016404 // 15-hydroxyprostaglandin dehydrogenase (NAD+) activity // non-traceable author statement /// 0016887 // ATPase activity // inferred from electronic annotation /// 0017111…	chr13:94616477-94751590 (-) // 86.09 // q32.1
ABCC4	10257	203196_at	1.27163	0.859774	0006810 // transport // inferred from electronic annotation /// 0006811 // ion transport // inferred from electronic annotation	0005624 // membrane fraction // inferred from direct assay /// 0005886 // plasma membrane // inferred from direct assay /// 0016020 // membrane // inferred from electronic annotation /// 0016021 // integral to membrane // inferred from electronic annotation /// 0031088 // platelet dense granule membrane // inferred from direct assay	0000166 // nucleotide binding // inferred from electronic annotation /// 0005254 // chloride channel activity // inferred from electronic annotation /// 0005524 // ATP binding // inferred from electronic annotation /// 0016404 // 15-hydroxyprostaglandin dehydrogenase (NAD+) activity // non-traceable author statement /// 0016887 // ATPase activity // inferred from electronic annotation /// 0017111…	chr13:94470090-94751684 (-) // 98.2 // q32.1
ABCC5	10057	1558460_at	0.00362064	0	0006810 // transport // traceable author statement /// 0006810 // transport // inferred from electronic annotation	0005624 // membrane fraction // inferred from direct assay /// 0005624 // membrane fraction // traceable author statement /// 0005887 // integral to plasma membrane // traceable author statement /// 0016020 // membrane // inferred from electronic annotation /// 0016021 // integral to membrane // inferred from electronic annotation	0000166 // nucleotide binding // inferred from electronic annotation /// 0005524 // ATP binding // traceable author statement /// 0005524 // ATP binding // inferred from electronic annotation /// 0008514 // organic anion transmembrane transporter activity // traceable author statement /// 0016887 // ATPase activity // inferred from electronic annotation /// 0017111 // nucleoside-triphosphatase ac…	chr3:185200864-185218419 (-) // 60.21 // q27.1
ABCC6	368	214033_at	0.00149761	0.0726107	0006810 // transport // traceable author statement /// 0006810 // transport // inferred from electronic annotation /// 0007601 // visual perception // inferred from electronic annotation /// 0042493 // response to drug // traceable author statement /// 0050896 // response to stimulus // inferred from electronic annotation	0005886 // plasma membrane // traceable author statement /// 0016020 // membrane // inferred from electronic annotation /// 0016021 // integral to membrane // inferred from electronic annotation	0000166 // nucleotide binding // inferred from electronic annotation /// 0005215 // transporter activity // traceable author statement /// 0005215 // transporter activity // inferred from electronic annotation /// 0005524 // ATP binding // traceable author statement /// 0005524 // ATP binding // inferred from electronic annotation /// 0016887 // ATPase activity // inferred from electronic annotat…	chr16:18490063-18492342 (+) // 97.66 // p12.3 /// chr16:16222547-16224827 (-) // 97.8 // p13.11 /// chr16:14823784-14826062 (-) // 97.52 // p13.11
ADRM1	11047	201281_at	0.596349	0.641319	0006368 // RNA elongation from RNA polymerase II promoter // inferred from mutant phenotype /// 0043248 // proteasome assembly // inferred from direct assay	0000502 // proteasome complex // inferred from direct assay /// 0005624 // membrane fraction // traceable author statement /// 0005634 // nucleus // inferred from electronic annotation /// 0005737 // cytoplasm // inferred from electronic annotation /// 0005829 // cytosol // inferred from electronic annotation /// 0005887 // integral to plasma membrane // traceable author statement /// 0043234 // …	0008538 // proteasome activator activity // inferred from direct assay	chr20:60312015-60317310 (+) // 96.07 // q13.33
AKT1	207	207163_s_at	0.895094	0.781708	0000060 // protein import into nucleus, translocation // inferred from mutant phenotype /// 0001568 // blood vessel development // inferred from electronic annotation /// 0001890 // placenta development // inferred from electronic annotation /// 0005975 // carbohydrate metabolic process // inferred from electronic annotation /// 0005977 // glycogen metabolic process // inferred from electronic an…	0005634 // nucleus // inferred from electronic annotation /// 0005634 // nucleus // inferred from direct assay /// 0005654 // nucleoplasm // not recorded /// 0005737 // cytoplasm // inferred from sequence or structural similarity /// 0005737 // cytoplasm // inferred from electronic annotation /// 0005737 // cytoplasm // inferred from direct assay /// 0005819 // spindle // inferred from electronic…	0000166 // nucleotide binding // inferred from electronic annotation /// 0004672 // protein kinase activity // inferred from electronic annotation /// 0004672 // protein kinase activity // traceable author statement /// 0004674 // protein serine/threonine kinase activity // not recorded /// 0004674 // protein serine/threonine kinase activity // inferred from direct assay /// 0004674 // protein se…	chr14:104306752-104330627 (-) // 99.5 // q32.33
APOBEC3G	60489	204205_at	-2.02135	-1.86985	0002230 // positive regulation of defense response to virus by host // inferred from direct assay /// 0006410 // transcription, RNA-dependent // inferred from direct assay /// 0009615 // response to virus // inferred from electronic annotation /// 0016553 // base conversion or substitution editing // traceable author statement /// 0044419 // interspecies interaction between organisms // inferred …	0005634 // nucleus // inferred from electronic annotation /// 0005634 // nucleus // inferred from direct assay /// 0005730 // nucleolus // inferred from direct assay /// 0005737 // cytoplasm // inferred from electronic annotation /// 0005737 // cytoplasm // inferred from direct assay /// 0005739 // mitochondrion // inferred from direct assay /// 0005829 // cytosol // not recorded /// 0030895 // a…	0003723 // RNA binding // inferred from direct assay /// 0003824 // catalytic activity // inferred from electronic annotation /// 0004126 // cytidine deaminase activity // traceable author statement /// 0005515 // protein binding // inferred from physical interaction /// 0008270 // zinc ion binding // inferred from direct assay /// 0008270 // zinc ion binding // inferred from electronic annotatio…	chr22:37803081-37813693 (+) // 99.36 // q13.1
ATF4	468	200779_at	-1.2574	-0.905721	0006094 // gluconeogenesis // inferred from sequence or structural similarity /// 0006094 // gluconeogenesis // inferred from electronic annotation /// 0006350 // transcription // inferred from electronic annotation /// 0006355 // regulation of transcription, DNA-dependent // inferred from sequence or structural similarity /// 0006355 // regulation of transcription, DNA-dependent // inferred from…	0005634 // nucleus // inferred from sequence or structural similarity /// 0005634 // nucleus // inferred from electronic annotation /// 0005634 // nucleus // inferred from direct assay /// 0005667 // transcription factor complex // inferred from electronic annotation /// 0005737 // cytoplasm // inferred from sequence or structural similarity /// 0005737 // cytoplasm // inferred from electronic an…	0003677 // DNA binding // inferred from electronic annotation /// 0003677 // DNA binding // inferred from direct assay /// 0003677 // DNA binding // inferred from sequence or structural similarity /// 0003700 // transcription factor activity // traceable author statement /// 0003700 // transcription factor activity // inferred from electronic annotation /// 0003702 // RNA polymerase II transcript…	chr22:38246514-38248631 (+) // 98.41 // q13.1
ATF6	22926	203952_at	-1.40087	-1.46613	0006350 // transcription // inferred from electronic annotation /// 0006355 // regulation of transcription, DNA-dependent // inferred from electronic annotation /// 0006357 // regulation of transcription from RNA polymerase II promoter // traceable author statement /// 0006457 // protein folding // traceable author statement /// 0006950 // response to stress // traceable author statement /// 0006…	0005634 // nucleus // traceable author statement /// 0005634 // nucleus // inferred from electronic annotation /// 0005635 // nuclear envelope // traceable author statement /// 0005654 // nucleoplasm // traceable author statement /// 0005783 // endoplasmic reticulum // inferred from electronic annotation /// 0005789 // endoplasmic reticulum membrane // traceable author statement /// 0005789 // en…	0003677 // DNA binding // inferred from electronic annotation /// 0003700 // transcription factor activity // traceable author statement /// 0003700 // transcription factor activity // inferred from electronic annotation /// 0003702 // RNA polymerase II transcription factor activity // traceable author statement /// 0003713 // transcription coactivator activity // traceable author statement /// 0…	chr1:160002733-160195475 (+) // 98.46 // q23.3
ATF6	22926	217550_at	-3.26676	-3.09262	0006350 // transcription // inferred from electronic annotation /// 0006355 // regulation of transcription, DNA-dependent // inferred from electronic annotation /// 0006357 // regulation of transcription from RNA polymerase II promoter // traceable author statement /// 0006457 // protein folding // traceable author statement /// 0006950 // response to stress // traceable author statement /// 0006…	0005634 // nucleus // traceable author statement /// 0005634 // nucleus // inferred from electronic annotation /// 0005635 // nuclear envelope // traceable author statement /// 0005654 // nucleoplasm // traceable author statement /// 0005783 // endoplasmic reticulum // inferred from electronic annotation /// 0005789 // endoplasmic reticulum membrane // traceable author statement /// 0005789 // en…	0003677 // DNA binding // inferred from electronic annotation /// 0003700 // transcription factor activity // traceable author statement /// 0003700 // transcription factor activity // inferred from electronic annotation /// 0003702 // RNA polymerase II transcription factor activity // traceable author statement /// 0003713 // transcription coactivator activity // traceable author statement /// 0…	chr1:160195920-160196537 (+) // 67.72 // q23.3
ATF6	22926	231927_at	-3.29985	-2.84219	0006350 // transcription // inferred from electronic annotation /// 0006355 // regulation of transcription, DNA-dependent // inferred from electronic annotation /// 0006357 // regulation of transcription from RNA polymerase II promoter // traceable author statement /// 0006457 // protein folding // traceable author statement /// 0006950 // response to stress // traceable author statement /// 0006…	0005634 // nucleus // traceable author statement /// 0005634 // nucleus // inferred from electronic annotation /// 0005635 // nuclear envelope // traceable author statement /// 0005654 // nucleoplasm // traceable author statement /// 0005783 // endoplasmic reticulum // inferred from electronic annotation /// 0005789 // endoplasmic reticulum membrane // traceable author statement /// 0005789 // en…	0003677 // DNA binding // inferred from electronic annotation /// 0003700 // transcription factor activity // traceable author statement /// 0003700 // transcription factor activity // inferred from electronic annotation /// 0003702 // RNA polymerase II transcription factor activity // traceable author statement /// 0003713 // transcription coactivator activity // traceable author statement /// 0…	chr1:160196958-160199922 (+) // 97.31 // q23.3
ATG5	9474	202511_s_at	0.325643	0.260386	0000045 // autophagic vacuole formation // inferred from sequence or structural similarity /// 0000045 // autophagic vacuole formation // inferred from electronic annotation /// 0001974 // blood vessel remodeling // inferred from electronic annotation /// 0006914 // autophagy // inferred from sequence or structural similarity /// 0006914 // autophagy // inferred from electronic annotation /// 000…	0005737 // cytoplasm // inferred from sequence or structural similarity /// 0005737 // cytoplasm // inferred from electronic annotation /// 0005776 // autophagic vacuole // inferred from direct assay /// 0005776 // autophagic vacuole // inferred from electronic annotation /// 0043231 // intracellular membrane-bounded organelle // inferred from sequence or structural similarity /// 0043231 // intr…	0005515 // protein binding // inferred from physical interaction /// 0005515 // protein binding // inferred from sequence or structural similarity /// 0005515 // protein binding // inferred from electronic annotation	chr6:106738977-106880361 (-) // 98.26 // q21
ATG5	9474	202512_s_at	-1.49133	-1.21129	0000045 // autophagic vacuole formation // inferred from sequence or structural similarity /// 0000045 // autophagic vacuole formation // inferred from electronic annotation /// 0001974 // blood vessel remodeling // inferred from electronic annotation /// 0006914 // autophagy // inferred from sequence or structural similarity /// 0006914 // autophagy // inferred from electronic annotation /// 000…	0005737 // cytoplasm // inferred from sequence or structural similarity /// 0005737 // cytoplasm // inferred from electronic annotation /// 0005776 // autophagic vacuole // inferred from direct assay /// 0005776 // autophagic vacuole // inferred from electronic annotation /// 0043231 // intracellular membrane-bounded organelle // inferred from sequence or structural similarity /// 0043231 // intr…	0005515 // protein binding // inferred from physical interaction /// 0005515 // protein binding // inferred from sequence or structural similarity /// 0005515 // protein binding // inferred from electronic annotation	chr6:106739043-106880361 (-) // 97.84 // q21
ATG5	9474	210639_s_at	0.77347	0.653486	0000045 // autophagic vacuole formation // inferred from sequence or structural similarity /// 0000045 // autophagic vacuole formation // inferred from electronic annotation /// 0001974 // blood vessel remodeling // inferred from electronic annotation /// 0006914 // autophagy // inferred from sequence or structural similarity /// 0006914 // autophagy // inferred from electronic annotation /// 000…	0005737 // cytoplasm // inferred from sequence or structural similarity /// 0005737 // cytoplasm // inferred from electronic annotation /// 0005776 // autophagic vacuole // inferred from direct assay /// 0005776 // autophagic vacuole // inferred from electronic annotation /// 0043231 // intracellular membrane-bounded organelle // inferred from sequence or structural similarity /// 0043231 // intr…	0005515 // protein binding // inferred from physical interaction /// 0005515 // protein binding // inferred from sequence or structural similarity /// 0005515 // protein binding // inferred from electronic annotation	chr6:106741101-106870776 (-) // 98.88 // q21
ATG7	10533	1569827_at	0.116307	0.00408746	0006464 // protein modification process // traceable author statement /// 0006497 // protein amino acid lipidation // inferred from direct assay /// 0006810 // transport // inferred from electronic annotation /// 0006914 // autophagy // inferred from electronic annotation /// 0006944 // membrane fusion // traceable author statement /// 0008152 // metabolic process // inferred from electronic anno…	0005737 // cytoplasm // traceable author statement /// 0005737 // cytoplasm // inferred from direct assay /// 0005737 // cytoplasm // inferred from electronic annotation	0003824 // catalytic activity // inferred from electronic annotation /// 0004839 // ubiquitin activating enzyme activity // traceable author statement /// 0005488 // binding // inferred from electronic annotation /// 0005515 // protein binding // inferred from physical interaction /// 0042803 // protein homodimerization activity // inferred from direct assay	chr3:11331953-11333180 (+) // 58.39 // p25.3
ATG7	10533	218673_s_at	1.3091	0.938589	0006464 // protein modification process // traceable author statement /// 0006497 // protein amino acid lipidation // inferred from direct assay /// 0006810 // transport // inferred from electronic annotation /// 0006914 // autophagy // inferred from electronic annotation /// 0006944 // membrane fusion // traceable author statement /// 0008152 // metabolic process // inferred from electronic anno…	0005737 // cytoplasm // traceable author statement /// 0005737 // cytoplasm // inferred from direct assay /// 0005737 // cytoplasm // inferred from electronic annotation	0003824 // catalytic activity // inferred from electronic annotation /// 0004839 // ubiquitin activating enzyme activity // traceable author statement /// 0005488 // binding // inferred from electronic annotation /// 0005515 // protein binding // inferred from physical interaction /// 0042803 // protein homodimerization activity // inferred from direct assay	chr3:11315158-11571556 (+) // 98.54 // p25.3
ATG7	10533	224025_s_at	1.42626	1.01961	0006464 // protein modification process // traceable author statement /// 0006497 // protein amino acid lipidation // inferred from direct assay /// 0006810 // transport // inferred from electronic annotation /// 0006914 // autophagy // inferred from electronic annotation /// 0006944 // membrane fusion // traceable author statement /// 0008152 // metabolic process // inferred from electronic anno…	0005737 // cytoplasm // traceable author statement /// 0005737 // cytoplasm // inferred from direct assay /// 0005737 // cytoplasm // inferred from electronic annotation	0003824 // catalytic activity // inferred from electronic annotation /// 0004839 // ubiquitin activating enzyme activity // traceable author statement /// 0005488 // binding // inferred from electronic annotation /// 0005515 // protein binding // inferred from physical interaction /// 0042803 // protein homodimerization activity // inferred from direct assay	chr3:11315158-11571556 (+) // 97.64 // p25.3
BAD	572	1861_at	0.437961	0.409867	0006915 // apoptosis // inferred from electronic annotation /// 0006915 // apoptosis // traceable author statement /// 0006917 // induction of apoptosis // non-traceable author statement /// 0008633 // activation of pro-apoptotic gene products // not recorded	0005737 // cytoplasm // non-traceable author statement /// 0005737 // cytoplasm // inferred from electronic annotation /// 0005739 // mitochondrion // inferred from electronic annotation /// 0005741 // mitochondrial outer membrane // not recorded /// 0005741 // mitochondrial outer membrane // non-traceable author statement /// 0005741 // mitochondrial outer membrane // inferred from electronic an…	0005515 // protein binding // inferred from physical interaction /// 0005515 // protein binding // non-traceable author statement	chr11:63793877-63808459 (-) // 97.38 // q13.1
BAK1	578	203728_at	0.021857	0.021857	0001836 // release of cytochrome c from mitochondria // inferred from direct assay /// 0006915 // apoptosis // inferred from electronic annotation /// 0006917 // induction of apoptosis // traceable author statement /// 0006917 // induction of apoptosis // non-traceable author statement /// 0006919 // activation of caspase activity // inferred from electronic annotation /// 0008053 // mitochondria…	0005622 // intracellular // inferred from electronic annotation /// 0005739 // mitochondrion // inferred from direct assay /// 0005739 // mitochondrion // inferred from electronic annotation /// 0005741 // mitochondrial outer membrane // not recorded /// 0016020 // membrane // inferred from electronic annotation /// 0016020 // membrane // non-traceable author statement /// 0016021 // integral to …	0005515 // protein binding // inferred from physical interaction /// 0008270 // zinc ion binding // inferred from electronic annotation /// 0042802 // identical protein binding // inferred from physical interaction /// 0046872 // metal ion binding // inferred from electronic annotation /// 0046982 // protein heterodimerization activity // inferred from physical interaction	chr11:129920632-129922721 (-) // 90.45 // q24.3 /// chr20:30740386-30742467 (-) // 97.37 // q11.21 /// chr6:33648306-33655937 (-) // 98.57 // p21.31
BAX	581	208478_s_at	1.81612	1.55819	0001101 // response to acid // inferred from electronic annotation /// 0001541 // ovarian follicle development // inferred from electronic annotation /// 0001777 // T cell homeostatic proliferation // inferred from electronic annotation /// 0001783 // B cell apoptosis // inferred from direct assay /// 0001783 // B cell apoptosis // inferred from expression pattern /// 0001822 // kidney developmen…	0005622 // intracellular // inferred from electronic annotation /// 0005625 // soluble fraction // inferred from electronic annotation /// 0005737 // cytoplasm // inferred from electronic annotation /// 0005739 // mitochondrion // inferred from direct assay /// 0005739 // mitochondrion // inferred from electronic annotation /// 0005741 // mitochondrial outer membrane // not recorded /// 0005741 /…	0005515 // protein binding // inferred from physical interaction /// 0005515 // protein binding // inferred from sequence or structural similarity /// 0005515 // protein binding // inferred from electronic annotation /// 0008289 // lipid binding // inferred from direct assay /// 0042802 // identical protein binding // inferred from physical interaction /// 0042803 // protein homodimerization acti…	chr19:54150615-54156166 (+) // 86.45 // q13.33
BAX	581	211833_s_at	1.2341	1.01887	0001101 // response to acid // inferred from electronic annotation /// 0001541 // ovarian follicle development // inferred from electronic annotation /// 0001777 // T cell homeostatic proliferation // inferred from electronic annotation /// 0001783 // B cell apoptosis // inferred from direct assay /// 0001783 // B cell apoptosis // inferred from expression pattern /// 0001822 // kidney developmen…	0005622 // intracellular // inferred from electronic annotation /// 0005625 // soluble fraction // inferred from electronic annotation /// 0005737 // cytoplasm // inferred from electronic annotation /// 0005739 // mitochondrion // inferred from direct assay /// 0005739 // mitochondrion // inferred from electronic annotation /// 0005741 // mitochondrial outer membrane // not recorded /// 0005741 /…	0005515 // protein binding // inferred from physical interaction /// 0005515 // protein binding // inferred from sequence or structural similarity /// 0005515 // protein binding // inferred from electronic annotation /// 0008289 // lipid binding // inferred from direct assay /// 0042802 // identical protein binding // inferred from physical interaction /// 0042803 // protein homodimerization acti…	chr19:54150615-54156706 (+) // 92.15 // q13.33
BCL2	596	207004_at	0.157593	-0.0168965	0000082 // G1/S transition of mitotic cell cycle // inferred from electronic annotation /// 0000902 // cell morphogenesis // inferred from electronic annotation /// 0001101 // response to acid // inferred from electronic annotation /// 0001503 // ossification // inferred from electronic annotation /// 0001541 // ovarian follicle development // inferred from electronic annotation /// 0001656 // me…	0000159 // protein phosphatase type 2A complex // inferred from electronic annotation /// 0005622 // intracellular // inferred from electronic annotation /// 0005624 // membrane fraction // inferred from electronic annotation /// 0005634 // nucleus // inferred from electronic annotation /// 0005634 // nucleus // inferred from direct assay /// 0005737 // cytoplasm // inferred from direct assay ///…	0002020 // protease binding // inferred from direct assay /// 0005515 // protein binding // inferred from electronic annotation /// 0005515 // protein binding // inferred from physical interaction /// 0005515 // protein binding // traceable author statement /// 0008134 // transcription factor binding // inferred from electronic annotation /// 0016563 // transcription activator activity // inferre…	chr18:59136114-59137025 (-) // 92.21 // q21.33
BCL2L1	598	206665_s_at	-0.115669	0.268017	0001541 // ovarian follicle development // inferred from electronic annotation /// 0001701 // in utero embryonic development // inferred from electronic annotation /// 0001836 // release of cytochrome c from mitochondria // inferred from direct assay /// 0006915 // apoptosis // inferred from electronic annotation /// 0006916 // anti-apoptosis // inferred from direct assay /// 0007281 // germ cell…	0005622 // intracellular // inferred from electronic annotation /// 0005634 // nucleus // inferred from electronic annotation /// 0005739 // mitochondrion // inferred from direct assay /// 0005739 // mitochondrion // inferred from electronic annotation /// 0005739 // mitochondrion // traceable author statement /// 0005741 // mitochondrial outer membrane // not recorded /// 0005741 // mitochondria…	0005515 // protein binding // inferred from physical interaction /// 0042802 // identical protein binding // inferred from physical interaction /// 0046982 // protein heterodimerization activity // inferred from electronic annotation	chr20:29717324-29773816 (-) // 99.59 // q11.21
BCL2L1	598	212312_at	-0.848971	-0.331288	0001541 // ovarian follicle development // inferred from electronic annotation /// 0001701 // in utero embryonic development // inferred from electronic annotation /// 0001836 // release of cytochrome c from mitochondria // inferred from direct assay /// 0006915 // apoptosis // inferred from electronic annotation /// 0006916 // anti-apoptosis // inferred from direct assay /// 0007281 // germ cell…	0005622 // intracellular // inferred from electronic annotation /// 0005634 // nucleus // inferred from electronic annotation /// 0005739 // mitochondrion // inferred from direct assay /// 0005739 // mitochondrion // inferred from electronic annotation /// 0005739 // mitochondrion // traceable author statement /// 0005741 // mitochondrial outer membrane // not recorded /// 0005741 // mitochondria…	0005515 // protein binding // inferred from physical interaction /// 0042802 // identical protein binding // inferred from physical interaction /// 0046982 // protein heterodimerization activity // inferred from electronic annotation	chr20:29715917-29774341 (-) // 97.94 // q11.21
BCL2L1	598	215037_s_at	0.832417	0.761328	0001541 // ovarian follicle development // inferred from electronic annotation /// 0001701 // in utero embryonic development // inferred from electronic annotation /// 0001836 // release of cytochrome c from mitochondria // inferred from direct assay /// 0006915 // apoptosis // inferred from electronic annotation /// 0006916 // anti-apoptosis // inferred from direct assay /// 0007281 // germ cell…	0005622 // intracellular // inferred from electronic annotation /// 0005634 // nucleus // inferred from electronic annotation /// 0005739 // mitochondrion // inferred from direct assay /// 0005739 // mitochondrion // inferred from electronic annotation /// 0005739 // mitochondrion // traceable author statement /// 0005741 // mitochondrial outer membrane // not recorded /// 0005741 // mitochondria…	0005515 // protein binding // inferred from physical interaction /// 0042802 // identical protein binding // inferred from physical interaction /// 0046982 // protein heterodimerization activity // inferred from electronic annotation	chr20:29772998-29774486 (-) // 99.67 // q11.21
BCL2L11	10018	1553088_a_at	0.0435014	0	0001701 // in utero embryonic development // inferred from electronic annotation /// 0001822 // kidney development // inferred from electronic annotation /// 0006915 // apoptosis // inferred from electronic annotation /// 0006917 // induction of apoptosis // traceable author statement /// 0007160 // cell-matrix adhesion // inferred from electronic annotation /// 0008633 // activation of pro-apopt…	0000300 // peripheral to membrane of membrane fraction // inferred from electronic annotation /// 0005624 // membrane fraction // traceable author statement /// 0005737 // cytoplasm // inferred from electronic annotation /// 0005739 // mitochondrion // inferred from electronic annotation /// 0005741 // mitochondrial outer membrane // not recorded /// 0005829 // cytosol // not recorded /// 0005886…	0005515 // protein binding // inferred from physical interaction /// 0008017 // microtubule binding // inferred from electronic annotation	chr2:111597793-111638279 (+) // 100.0 // q13
BCL2L11	10018	1553096_s_at	0.521342	0.425473	0001701 // in utero embryonic development // inferred from electronic annotation /// 0001822 // kidney development // inferred from electronic annotation /// 0006915 // apoptosis // inferred from electronic annotation /// 0006917 // induction of apoptosis // traceable author statement /// 0007160 // cell-matrix adhesion // inferred from electronic annotation /// 0008633 // activation of pro-apopt…	0000300 // peripheral to membrane of membrane fraction // inferred from electronic annotation /// 0005624 // membrane fraction // traceable author statement /// 0005737 // cytoplasm // inferred from electronic annotation /// 0005739 // mitochondrion // inferred from electronic annotation /// 0005741 // mitochondrial outer membrane // not recorded /// 0005829 // cytosol // not recorded /// 0005886…	0005515 // protein binding // inferred from physical interaction /// 0008017 // microtubule binding // inferred from electronic annotation	chr2:111597793-111638279 (+) // 100.0 // q13
BCL2L11	10018	1555372_at	-0.752647	0.254547	0001701 // in utero embryonic development // inferred from electronic annotation /// 0001822 // kidney development // inferred from electronic annotation /// 0006915 // apoptosis // inferred from electronic annotation /// 0006917 // induction of apoptosis // traceable author statement /// 0007160 // cell-matrix adhesion // inferred from electronic annotation /// 0008633 // activation of pro-apopt…	0000300 // peripheral to membrane of membrane fraction // inferred from electronic annotation /// 0005624 // membrane fraction // traceable author statement /// 0005737 // cytoplasm // inferred from electronic annotation /// 0005739 // mitochondrion // inferred from electronic annotation /// 0005741 // mitochondrial outer membrane // not recorded /// 0005829 // cytosol // not recorded /// 0005886…	0005515 // protein binding // inferred from physical interaction /// 0008017 // microtubule binding // inferred from electronic annotation	chr2:111623996-111628401 (+) // 74.29 // q13
BCL2L11	10018	1558143_a_at	0.288181	0.608566	0001701 // in utero embryonic development // inferred from electronic annotation /// 0001822 // kidney development // inferred from electronic annotation /// 0006915 // apoptosis // inferred from electronic annotation /// 0006917 // induction of apoptosis // traceable author statement /// 0007160 // cell-matrix adhesion // inferred from electronic annotation /// 0008633 // activation of pro-apopt…	0000300 // peripheral to membrane of membrane fraction // inferred from electronic annotation /// 0005624 // membrane fraction // traceable author statement /// 0005737 // cytoplasm // inferred from electronic annotation /// 0005739 // mitochondrion // inferred from electronic annotation /// 0005741 // mitochondrial outer membrane // not recorded /// 0005829 // cytosol // not recorded /// 0005886…	0005515 // protein binding // inferred from physical interaction /// 0008017 // microtubule binding // inferred from electronic annotation	chr2:111638869-111641074 (+) // 96.19 // q13
BCL2L11	10018	208536_s_at	-0.000480632	0.00220296	0001701 // in utero embryonic development // inferred from electronic annotation /// 0001822 // kidney development // inferred from electronic annotation /// 0006915 // apoptosis // inferred from electronic annotation /// 0006917 // induction of apoptosis // traceable author statement /// 0007160 // cell-matrix adhesion // inferred from electronic annotation /// 0008633 // activation of pro-apopt…	0000300 // peripheral to membrane of membrane fraction // inferred from electronic annotation /// 0005624 // membrane fraction // traceable author statement /// 0005737 // cytoplasm // inferred from electronic annotation /// 0005739 // mitochondrion // inferred from electronic annotation /// 0005741 // mitochondrial outer membrane // not recorded /// 0005829 // cytosol // not recorded /// 0005886…	0005515 // protein binding // inferred from physical interaction /// 0008017 // microtubule binding // inferred from electronic annotation	chr2:111597793-111638279 (+) // 99.76 // q13
BCL2L11	10018	222343_at	0.261874	0.149224	0001701 // in utero embryonic development // inferred from electronic annotation /// 0001822 // kidney development // inferred from electronic annotation /// 0006915 // apoptosis // inferred from electronic annotation /// 0006917 // induction of apoptosis // traceable author statement /// 0007160 // cell-matrix adhesion // inferred from electronic annotation /// 0008633 // activation of pro-apopt…	0000300 // peripheral to membrane of membrane fraction // inferred from electronic annotation /// 0005624 // membrane fraction // traceable author statement /// 0005737 // cytoplasm // inferred from electronic annotation /// 0005739 // mitochondrion // inferred from electronic annotation /// 0005741 // mitochondrial outer membrane // not recorded /// 0005829 // cytosol // not recorded /// 0005886…	0005515 // protein binding // inferred from physical interaction /// 0008017 // microtubule binding // inferred from electronic annotation	chr2:111638208-111638679 (+) // 98.32 // q13
BCL2L11	10018	225606_at	-0.173948	0.116103	0001701 // in utero embryonic development // inferred from electronic annotation /// 0001822 // kidney development // inferred from electronic annotation /// 0006915 // apoptosis // inferred from electronic annotation /// 0006917 // induction of apoptosis // traceable author statement /// 0007160 // cell-matrix adhesion // inferred from electronic annotation /// 0008633 // activation of pro-apopt…	0000300 // peripheral to membrane of membrane fraction // inferred from electronic annotation /// 0005624 // membrane fraction // traceable author statement /// 0005737 // cytoplasm // inferred from electronic annotation /// 0005739 // mitochondrion // inferred from electronic annotation /// 0005741 // mitochondrial outer membrane // not recorded /// 0005829 // cytosol // not recorded /// 0005886…	0005515 // protein binding // inferred from physical interaction /// 0008017 // microtubule binding // inferred from electronic annotation	chr2:111638869-111642492 (+) // 98.6 // q13
BIK	638	205780_at	-0.497961	0.774474	0006915 // apoptosis // inferred from electronic annotation /// 0006917 // induction of apoptosis // traceable author statement /// 0006917 // induction of apoptosis // inferred from electronic annotation /// 0042981 // regulation of apoptosis // inferred from electronic annotation	0005740 // mitochondrial envelope // inferred from electronic annotation /// 0012505 // endomembrane system // inferred from electronic annotation /// 0016020 // membrane // inferred from electronic annotation /// 0016021 // integral to membrane // inferred from electronic annotation	0005515 // protein binding // inferred from physical interaction /// 0005515 // protein binding // inferred from electronic annotation	chr22:41849574-41855661 (+) // 68.15 // q13.2
CCND1	595	208711_s_at	-0.0106358	-0.100364	0000082 // G1/S transition of mitotic cell cycle // non-traceable author statement /// 0000082 // G1/S transition of mitotic cell cycle // traceable author statement /// 0000320 // re-entry into mitotic cell cycle // inferred from electronic annotation /// 0001934 // positive regulation of protein amino acid phosphorylation // inferred from direct assay /// 0006468 // protein amino acid phosphory…	0000307 // cyclin-dependent protein kinase holoenzyme complex // inferred from electronic annotation /// 0000307 // cyclin-dependent protein kinase holoenzyme complex // inferred from direct assay /// 0005622 // intracellular // inferred from direct assay /// 0005634 // nucleus // inferred from electronic annotation /// 0005654 // nucleoplasm // not recorded /// 0005829 // cytosol // not recorded…	0004672 // protein kinase activity // inferred from electronic annotation /// 0004872 // receptor activity // traceable author statement /// 0005515 // protein binding // inferred from physical interaction /// 0005515 // protein binding // inferred from electronic annotation /// 0016301 // kinase activity // inferred from electronic annotation /// 0016538 // cyclin-dependent protein kinase regula…	chr11:69165118-69175408 (+) // 93.41 // q13.2
CCND1	595	208712_at	-0.0418997	0.00800222	0000082 // G1/S transition of mitotic cell cycle // non-traceable author statement /// 0000082 // G1/S transition of mitotic cell cycle // traceable author statement /// 0000320 // re-entry into mitotic cell cycle // inferred from electronic annotation /// 0001934 // positive regulation of protein amino acid phosphorylation // inferred from direct assay /// 0006468 // protein amino acid phosphory…	0000307 // cyclin-dependent protein kinase holoenzyme complex // inferred from electronic annotation /// 0000307 // cyclin-dependent protein kinase holoenzyme complex // inferred from direct assay /// 0005622 // intracellular // inferred from direct assay /// 0005634 // nucleus // inferred from electronic annotation /// 0005654 // nucleoplasm // not recorded /// 0005829 // cytosol // not recorded	0004672 // protein kinase activity // inferred from electronic annotation /// 0005515 // protein binding // inferred from physical interaction /// 0005515 // protein binding // inferred from electronic annotation /// 0016301 // kinase activity // inferred from electronic annotation /// 0016538 // cyclin-dependent protein kinase regulator activity // inferred from electronic annotation /// 0019901…	chr11:69165121-69178419 (+) // 97.77 // q13.2
CDC2	983	203213_at	0.845042	0.674957	0006468 // protein amino acid phosphorylation // inferred from electronic annotation /// 0006916 // anti-apoptosis // inferred from direct assay /// 0007049 // cell cycle // inferred from electronic annotation /// 0007067 // mitosis // inferred from electronic annotation /// 0007095 // mitotic cell cycle G2/M transition DNA damage checkpoint // inferred from electronic annotation /// 0031145 // a…	0005634 // nucleus // inferred from direct assay /// 0005634 // nucleus // inferred from electronic annotation /// 0005634 // nucleus // traceable author statement /// 0005654 // nucleoplasm // not recorded /// 0005737 // cytoplasm // inferred from direct assay /// 0005829 // cytosol // not recorded /// 0005876 // spindle microtubule // inferred from direct assay /// 0030496 // midbody // inferre…	0000166 // nucleotide binding // inferred from electronic annotation /// 0004672 // protein kinase activity // inferred from electronic annotation /// 0004672 // protein kinase activity // non-traceable author statement /// 0004674 // protein serine/threonine kinase activity // inferred from electronic annotation /// 0004693 // cyclin-dependent protein kinase activity // not recorded /// 0004693 …	chr10:62208241-62224668 (+) // 95.12 // q21.2
CDC2	983	203214_x_at	1.34085	1.11422	0006468 // protein amino acid phosphorylation // inferred from electronic annotation /// 0006916 // anti-apoptosis // inferred from direct assay /// 0007049 // cell cycle // inferred from electronic annotation /// 0007067 // mitosis // inferred from electronic annotation /// 0007095 // mitotic cell cycle G2/M transition DNA damage checkpoint // inferred from electronic annotation /// 0031145 // a…	0005634 // nucleus // inferred from direct assay /// 0005634 // nucleus // inferred from electronic annotation /// 0005634 // nucleus // traceable author statement /// 0005654 // nucleoplasm // not recorded /// 0005737 // cytoplasm // inferred from direct assay /// 0005829 // cytosol // not recorded /// 0005876 // spindle microtubule // inferred from direct assay /// 0030496 // midbody // inferre…	0000166 // nucleotide binding // inferred from electronic annotation /// 0004672 // protein kinase activity // inferred from electronic annotation /// 0004672 // protein kinase activity // non-traceable author statement /// 0004674 // protein serine/threonine kinase activity // inferred from electronic annotation /// 0004693 // cyclin-dependent protein kinase activity // not recorded /// 0004693 …	chr10:62208241-62223768 (+) // 98.76 // q21.2
CDC2	983	210559_s_at	1.29135	1.03267	0006468 // protein amino acid phosphorylation // inferred from electronic annotation /// 0006916 // anti-apoptosis // inferred from direct assay /// 0007049 // cell cycle // inferred from electronic annotation /// 0007067 // mitosis // inferred from electronic annotation /// 0007095 // mitotic cell cycle G2/M transition DNA damage checkpoint // inferred from electronic annotation /// 0031145 // a…	0005634 // nucleus // inferred from direct assay /// 0005634 // nucleus // inferred from electronic annotation /// 0005634 // nucleus // traceable author statement /// 0005654 // nucleoplasm // not recorded /// 0005737 // cytoplasm // inferred from direct assay /// 0005829 // cytosol // not recorded /// 0005876 // spindle microtubule // inferred from direct assay /// 0030496 // midbody // inferre…	0000166 // nucleotide binding // inferred from electronic annotation /// 0004672 // protein kinase activity // inferred from electronic annotation /// 0004672 // protein kinase activity // non-traceable author statement /// 0004674 // protein serine/threonine kinase activity // inferred from electronic annotation /// 0004693 // cyclin-dependent protein kinase activity // not recorded /// 0004693 …	chr10:62209903-62223768 (+) // 99.62 // q21.2
CDC2	983	231534_at	1.97259	1.44214	0006468 // protein amino acid phosphorylation // inferred from electronic annotation /// 0006916 // anti-apoptosis // inferred from direct assay /// 0007049 // cell cycle // inferred from electronic annotation /// 0007067 // mitosis // inferred from electronic annotation /// 0007095 // mitotic cell cycle G2/M transition DNA damage checkpoint // inferred from electronic annotation /// 0031145 // a…	0005634 // nucleus // inferred from direct assay /// 0005634 // nucleus // inferred from electronic annotation /// 0005634 // nucleus // traceable author statement /// 0005654 // nucleoplasm // not recorded /// 0005737 // cytoplasm // inferred from direct assay /// 0005829 // cytosol // not recorded /// 0005876 // spindle microtubule // inferred from direct assay /// 0030496 // midbody // inferre…	0000166 // nucleotide binding // inferred from electronic annotation /// 0004672 // protein kinase activity // inferred from electronic annotation /// 0004672 // protein kinase activity // non-traceable author statement /// 0004674 // protein serine/threonine kinase activity // inferred from electronic annotation /// 0004693 // cyclin-dependent protein kinase activity // not recorded /// 0004693 …	chr10:62209903-62217966 (-) // 94.75 // q21.2
CDC20	991	202870_s_at	1.88772	1.56668	0006511 // ubiquitin-dependent protein catabolic process // traceable author statement /// 0007049 // cell cycle // traceable author statement /// 0007049 // cell cycle // inferred from electronic annotation /// 0007067 // mitosis // inferred from electronic annotation /// 0019941 // modification-dependent protein catabolic process // inferred from electronic annotation /// 0031145 // anaphase-pr…	0005654 // nucleoplasm // not recorded /// 0005819 // spindle // traceable author statement /// 0005829 // cytosol // not recorded	0005515 // protein binding // inferred from physical interaction	chr1:43597214-43601458 (+) // 96.44 // p34.2 /// chr9:88816308-88817945 (+) // 93.3 // q21.33
CDK2	1017	204252_at	2.05118	2.02832	0000086 // G2/M transition of mitotic cell cycle // traceable author statement /// 0006275 // regulation of DNA replication // traceable author statement /// 0006468 // protein amino acid phosphorylation // inferred from electronic annotation /// 0007049 // cell cycle // inferred from electronic annotation /// 0007067 // mitosis // inferred from electronic annotation /// 0007089 // traversing sta…	0000307 // cyclin-dependent protein kinase holoenzyme complex // inferred from direct assay /// 0005634 // nucleus // inferred from direct assay /// 0005634 // nucleus // traceable author statement /// 0005654 // nucleoplasm // not recorded /// 0005737 // cytoplasm // traceable author statement /// 0005829 // cytosol // not recorded	0000166 // nucleotide binding // inferred from electronic annotation /// 0004672 // protein kinase activity // inferred from electronic annotation /// 0004672 // protein kinase activity // traceable author statement /// 0004674 // protein serine/threonine kinase activity // inferred from electronic annotation /// 0004693 // cyclin-dependent protein kinase activity // not recorded /// 0004693 // c…	chr12:54646868-54652805 (+) // 98.92 // q13.2
CDK2	1017	211804_s_at	2.43316	2.09111	0000086 // G2/M transition of mitotic cell cycle // traceable author statement /// 0006275 // regulation of DNA replication // traceable author statement /// 0006468 // protein amino acid phosphorylation // inferred from electronic annotation /// 0007049 // cell cycle // inferred from electronic annotation /// 0007067 // mitosis // inferred from electronic annotation /// 0007089 // traversing sta…	0000307 // cyclin-dependent protein kinase holoenzyme complex // inferred from direct assay /// 0005634 // nucleus // inferred from direct assay /// 0005634 // nucleus // traceable author statement /// 0005654 // nucleoplasm // not recorded /// 0005737 // cytoplasm // traceable author statement /// 0005829 // cytosol // not recorded	0000166 // nucleotide binding // inferred from electronic annotation /// 0004672 // protein kinase activity // inferred from electronic annotation /// 0004672 // protein kinase activity // traceable author statement /// 0004674 // protein serine/threonine kinase activity // inferred from electronic annotation /// 0004693 // cyclin-dependent protein kinase activity // not recorded /// 0004693 // c…	chr12:54647057-54651679 (+) // 97.88 // q13.2
CDKN1A	1026	202284_s_at	-2.04771	-1.72895	0000079 // regulation of cyclin-dependent protein kinase activity // traceable author statement /// 0000082 // G1/S transition of mitotic cell cycle // inferred from direct assay /// 0000086 // G2/M transition of mitotic cell cycle // inferred from mutant phenotype /// 0006974 // response to DNA damage stimulus // inferred from electronic annotation /// 0007049 // cell cycle // inferred from elec…	0000307 // cyclin-dependent protein kinase holoenzyme complex // inferred from electronic annotation /// 0000307 // cyclin-dependent protein kinase holoenzyme complex // inferred from direct assay /// 0005634 // nucleus // inferred from electronic annotation /// 0005634 // nucleus // inferred from direct assay /// 0005654 // nucleoplasm // not recorded /// 0005737 // cytoplasm // inferred from el…	0004860 // protein kinase inhibitor activity // inferred from electronic annotation /// 0004861 // cyclin-dependent protein kinase inhibitor activity // not recorded /// 0004861 // cyclin-dependent protein kinase inhibitor activity // traceable author statement /// 0004861 // cyclin-dependent protein kinase inhibitor activity // inferred from electronic annotation /// 0005515 // protein binding /…	chr6:36754483-36763086 (+) // 92.93 // p21.31
CDKN1B	1027	209112_at	-0.268469	-0.35109	0000079 // regulation of cyclin-dependent protein kinase activity // traceable author statement /// 0000082 // G1/S transition of mitotic cell cycle // inferred from direct assay /// 0006813 // potassium ion transport // inferred from electronic annotation /// 0006917 // induction of apoptosis // inferred from direct assay /// 0007049 // cell cycle // inferred from electronic annotation /// 00070…	0005634 // nucleus // inferred from direct assay /// 0005634 // nucleus // inferred from electronic annotation /// 0005737 // cytoplasm // inferred from direct assay /// 0005737 // cytoplasm // inferred from electronic annotation /// 0005829 // cytosol // not recorded /// 0005829 // cytosol // inferred from electronic annotation	0004860 // protein kinase inhibitor activity // inferred from electronic annotation /// 0004861 // cyclin-dependent protein kinase inhibitor activity // traceable author statement /// 0004861 // cyclin-dependent protein kinase inhibitor activity // inferred from electronic annotation /// 0005072 // transforming growth factor beta receptor, cytoplasmic mediator activity // traceable author stateme…	chr12:12761663-12766569 (+) // 97.77 // p13.1
CFTR	1080	205043_at	-2.60891	-4.371	0006695 // cholesterol biosynthetic process // inferred from electronic annotation /// 0006810 // transport // inferred from electronic annotation /// 0006810 // transport // traceable author statement /// 0006811 // ion transport // inferred from electronic annotation /// 0007585 // respiratory gaseous exchange // traceable author statement /// 0030301 // cholesterol transport // inferred from e…	0016020 // membrane // inferred from electronic annotation /// 0016021 // integral to membrane // inferred from electronic annotation /// 0016323 // basolateral plasma membrane // non-traceable author statement /// 0016324 // apical plasma membrane // inferred from direct assay /// 0030659 // cytoplasmic vesicle membrane // inferred from electronic annotation	0000166 // nucleotide binding // inferred from electronic annotation /// 0005216 // ion channel activity // inferred from electronic annotation /// 0005224 // ATP-binding and phosphorylation-dependent chloride channel activity // traceable author statement /// 0005254 // chloride channel activity // inferred from electronic annotation /// 0005254 // chloride channel activity // traceable author s…	chr7:116907252-117095951 (+) // 99.4 // q31.2
CFTR	1080	215702_s_at	-1.63896	-1.55997	0006695 // cholesterol biosynthetic process // inferred from electronic annotation /// 0006810 // transport // inferred from electronic annotation /// 0006810 // transport // traceable author statement /// 0006811 // ion transport // inferred from electronic annotation /// 0007585 // respiratory gaseous exchange // traceable author statement /// 0030301 // cholesterol transport // inferred from e…	0016020 // membrane // inferred from electronic annotation /// 0016021 // integral to membrane // inferred from electronic annotation /// 0016323 // basolateral plasma membrane // non-traceable author statement /// 0016324 // apical plasma membrane // inferred from direct assay /// 0030659 // cytoplasmic vesicle membrane // inferred from electronic annotation	0000166 // nucleotide binding // inferred from electronic annotation /// 0005216 // ion channel activity // inferred from electronic annotation /// 0005224 // ATP-binding and phosphorylation-dependent chloride channel activity // traceable author statement /// 0005254 // chloride channel activity // inferred from electronic annotation /// 0005254 // chloride channel activity // traceable author s…	chr7:117037808-117055354 (+) // 98.06 // q31.2
CFTR	1080	215703_at	-0.705009	-0.70331	0006695 // cholesterol biosynthetic process // inferred from electronic annotation /// 0006810 // transport // inferred from electronic annotation /// 0006810 // transport // traceable author statement /// 0006811 // ion transport // inferred from electronic annotation /// 0007585 // respiratory gaseous exchange // traceable author statement /// 0030301 // cholesterol transport // inferred from e…	0016020 // membrane // inferred from electronic annotation /// 0016021 // integral to membrane // inferred from electronic annotation /// 0016323 // basolateral plasma membrane // non-traceable author statement /// 0016324 // apical plasma membrane // inferred from direct assay /// 0030659 // cytoplasmic vesicle membrane // inferred from electronic annotation	0000166 // nucleotide binding // inferred from electronic annotation /// 0005216 // ion channel activity // inferred from electronic annotation /// 0005224 // ATP-binding and phosphorylation-dependent chloride channel activity // traceable author statement /// 0005254 // chloride channel activity // inferred from electronic annotation /// 0005254 // chloride channel activity // traceable author s…	chr7:117037808-117055354 (+) // 98.06 // q31.2
EGFR	1956	201983_s_at	-1.72598	-1.70595	0001503 // ossification // non-traceable author statement /// 0006468 // protein amino acid phosphorylation // inferred from electronic annotation /// 0006950 // response to stress // non-traceable author statement /// 0007049 // cell cycle // inferred from electronic annotation /// 0007165 // signal transduction // inferred from electronic annotation /// 0007165 // signal transduction // inferre…	0005576 // extracellular region // inferred from electronic annotation /// 0005615 // extracellular space // non-traceable author statement /// 0005622 // intracellular // inferred from electronic annotation /// 0005634 // nucleus // inferred from direct assay /// 0005737 // cytoplasm // inferred from direct assay /// 0005768 // endosome // inferred from direct assay /// 0005783 // endoplasmic re…	0000166 // nucleotide binding // inferred from electronic annotation /// 0003690 // double-stranded DNA binding // non-traceable author statement /// 0004672 // protein kinase activity // inferred from electronic annotation /// 0004710 // MAP/ERK kinase kinase activity // non-traceable author statement /// 0004713 // protein tyrosine kinase activity // inferred from electronic annotation /// 0004…	chr7:55054218-55243266 (+) // 99.46 // p11.2
EGFR	1956	201984_s_at	-1.39038	-1.29214	0001503 // ossification // non-traceable author statement /// 0006468 // protein amino acid phosphorylation // inferred from electronic annotation /// 0006950 // response to stress // non-traceable author statement /// 0007049 // cell cycle // inferred from electronic annotation /// 0007165 // signal transduction // inferred from electronic annotation /// 0007165 // signal transduction // inferre…	0005576 // extracellular region // inferred from electronic annotation /// 0005615 // extracellular space // non-traceable author statement /// 0005622 // intracellular // inferred from electronic annotation /// 0005634 // nucleus // inferred from direct assay /// 0005737 // cytoplasm // inferred from direct assay /// 0005768 // endosome // inferred from direct assay /// 0005783 // endoplasmic re…	0000166 // nucleotide binding // inferred from electronic annotation /// 0003690 // double-stranded DNA binding // non-traceable author statement /// 0004672 // protein kinase activity // inferred from electronic annotation /// 0004710 // MAP/ERK kinase kinase activity // non-traceable author statement /// 0004713 // protein tyrosine kinase activity // inferred from electronic annotation /// 0004…	chr7:55054287-55242519 (+) // 99.3 // p11.2
EIF2A	83939	223015_at	1.0945	1.07544	0006412 // translation // inferred from electronic annotation /// 0006417 // regulation of translation // inferred from mutant phenotype /// 0006417 // regulation of translation // inferred from electronic annotation /// 0042255 // ribosome assembly // inferred from mutant phenotype	0005737 // cytoplasm // inferred from direct assay /// 0005850 // eukaryotic translation initiation factor 2 complex // inferred from direct assay	0000049 // tRNA binding // inferred from mutant phenotype /// 0003743 // translation initiation factor activity // inferred from mutant phenotype /// 0003743 // translation initiation factor activity // inferred from electronic annotation /// 0043022 // ribosome binding // inferred from mutant phenotype	chr3:151747204-151784717 (+) // 98.62 // q25.1
EIF2AK3	9451	218696_at	-1.33212	-1.43801	0001501 // skeletal system development // inferred from sequence or structural similarity /// 0001501 // skeletal system development // inferred from electronic annotation /// 0001503 // ossification // inferred from mutant phenotype /// 0002063 // chondrocyte development // inferred from sequence or structural similarity /// 0002063 // chondrocyte development // inferred from electronic annotati…	0005737 // cytoplasm // inferred from sequence or structural similarity /// 0005737 // cytoplasm // inferred from electronic annotation /// 0005783 // endoplasmic reticulum // inferred by curator /// 0005783 // endoplasmic reticulum // inferred from sequence or structural similarity /// 0005783 // endoplasmic reticulum // traceable author statement /// 0005783 // endoplasmic reticulum // inferred…	0000166 // nucleotide binding // inferred from electronic annotation /// 0003743 // translation initiation factor activity // inferred from electronic annotation /// 0004672 // protein kinase activity // inferred from electronic annotation /// 0004672 // protein kinase activity // traceable author statement /// 0004674 // protein serine/threonine kinase activity // inferred from electronic annota…	chr2:88637464-88707979 (-) // 95.28 // p11.2
EIF3E	3646	208697_s_at	0.723279	0.748651	0006412 // translation // inferred from electronic annotation /// 0006446 // regulation of translational initiation // non-traceable author statement	0005634 // nucleus // inferred from electronic annotation /// 0005654 // nucleoplasm // non-traceable author statement /// 0005737 // cytoplasm // inferred from electronic annotation /// 0005737 // cytoplasm // inferred from direct assay /// 0005829 // cytosol // not recorded /// 0005852 // eukaryotic translation initiation factor 3 complex // inferred from direct assay	0003743 // translation initiation factor activity // inferred from electronic annotation /// 0003743 // translation initiation factor activity // inferred by curator /// 0005515 // protein binding // inferred from physical interaction	chr6:74058402-74059731 (+) // 91.09 // q13 /// chr8:109283277-109330113 (-) // 98.19 // q23.1
EPHB2	2048	209589_s_at	0.989618	0.983804	0006468 // protein amino acid phosphorylation // traceable author statement /// 0006468 // protein amino acid phosphorylation // inferred from electronic annotation /// 0007049 // cell cycle // inferred from electronic annotation /// 0007169 // transmembrane receptor protein tyrosine kinase signaling pathway // inferred from electronic annotation /// 0007399 // nervous system development // trace…	0016020 // membrane // inferred from electronic annotation /// 0016021 // integral to membrane // traceable author statement /// 0016021 // integral to membrane // inferred from electronic annotation	0000166 // nucleotide binding // inferred from electronic annotation /// 0004672 // protein kinase activity // inferred from electronic annotation /// 0004713 // protein tyrosine kinase activity // inferred from electronic annotation /// 0004713 // protein tyrosine kinase activity // inferred from sequence or structural similarity /// 0004714 // transmembrane receptor protein tyrosine kinase acti…	chr1:22910044-23113669 (+) // 98.58 // p36.12
EPHB2	2048	210651_s_at	0.769807	0.740264	0006468 // protein amino acid phosphorylation // traceable author statement /// 0006468 // protein amino acid phosphorylation // inferred from electronic annotation /// 0007049 // cell cycle // inferred from electronic annotation /// 0007169 // transmembrane receptor protein tyrosine kinase signaling pathway // inferred from electronic annotation /// 0007399 // nervous system development // trace…	0016020 // membrane // inferred from electronic annotation /// 0016021 // integral to membrane // traceable author statement /// 0016021 // integral to membrane // inferred from electronic annotation	0000166 // nucleotide binding // inferred from electronic annotation /// 0004672 // protein kinase activity // inferred from electronic annotation /// 0004713 // protein tyrosine kinase activity // inferred from electronic annotation /// 0004713 // protein tyrosine kinase activity // inferred from sequence or structural similarity /// 0004714 // transmembrane receptor protein tyrosine kinase acti…	chr1:22910049-23113350 (+) // 97.4 // p36.12
ERBB2	2064	216836_s_at	-0.551968	-0.447546	0006468 // protein amino acid phosphorylation // inferred from electronic annotation /// 0006468 // protein amino acid phosphorylation // traceable author statement /// 0007165 // signal transduction // inferred from direct assay /// 0007166 // cell surface receptor linked signal transduction // inferred from direct assay /// 0007167 // enzyme linked receptor protein signaling pathway // traceabl…	0005576 // extracellular region // inferred from direct assay /// 0005737 // cytoplasm // inferred from electronic annotation /// 0005886 // plasma membrane // non-traceable author statement /// 0016020 // membrane // inferred from electronic annotation /// 0016021 // integral to membrane // non-traceable author statement /// 0016021 // integral to membrane // inferred from electronic annotation …	0000166 // nucleotide binding // inferred from electronic annotation /// 0004672 // protein kinase activity // inferred from electronic annotation /// 0004713 // protein tyrosine kinase activity // inferred from electronic annotation /// 0004713 // protein tyrosine kinase activity // inferred from direct assay /// 0004713 // protein tyrosine kinase activity // inferred from genetic interaction //…	chr17:35109876-35138354 (+) // 98.14 // q12
ERN1	2081	235745_at	-0.153848	-0.0720811	0006350 // transcription // inferred from electronic annotation /// 0006355 // regulation of transcription, DNA-dependent // inferred from electronic annotation /// 0006397 // mRNA processing // inferred from electronic annotation /// 0006464 // protein modification process // traceable author statement /// 0006468 // protein amino acid phosphorylation // inferred from direct assay /// 0006468 //…	0005783 // endoplasmic reticulum // inferred from electronic annotation /// 0005789 // endoplasmic reticulum membrane // traceable author statement /// 0005789 // endoplasmic reticulum membrane // inferred from electronic annotation /// 0016020 // membrane // inferred from electronic annotation /// 0016021 // integral to membrane // inferred from electronic annotation /// 0030176 // integral to e…	0000166 // nucleotide binding // inferred from electronic annotation /// 0000287 // magnesium ion binding // inferred from direct assay /// 0000287 // magnesium ion binding // inferred from electronic annotation /// 0003824 // catalytic activity // inferred from electronic annotation /// 0004521 // endoribonuclease activity // inferred from direct assay /// 0004672 // protein kinase activity // i…	chr17:59559844-59560580 (-) // 98.39 // q23.3
GPX1	2876	200736_s_at	0.356489	0.354351	0000302 // response to reactive oxygen species // inferred from electronic annotation /// 0001659 // temperature homeostasis // inferred from electronic annotation /// 0001836 // release of cytochrome c from mitochondria // inferred from mutant phenotype /// 0001885 // endothelial cell development // inferred from electronic annotation /// 0002862 // negative regulation of inflammatory response t…	0005737 // cytoplasm // inferred from electronic annotation /// 0005737 // cytoplasm // inferred from direct assay /// 0005739 // mitochondrion // inferred from electronic annotation /// 0005739 // mitochondrion // inferred from direct assay /// 0005829 // cytosol // not recorded	0004601 // peroxidase activity // inferred from electronic annotation /// 0004602 // glutathione peroxidase activity // not recorded /// 0004602 // glutathione peroxidase activity // inferred from electronic annotation /// 0004602 // glutathione peroxidase activity // inferred from direct assay /// 0008430 // selenium binding // inferred from electronic annotation /// 0008539 // proteasome inhibi…	chr3:49369615-49371034 (-) // 98.15 // p21.31 /// chrX:13306567-13307427 (-) // 73.99 // p22.2
GSS	2937	201415_at	0.364689	0.334696	0006520 // amino acid metabolic process // traceable author statement /// 0006750 // glutathione biosynthetic process // inferred from electronic annotation /// 0006979 // response to oxidative stress // traceable author statement /// 0007399 // nervous system development // traceable author statement /// 0046686 // response to cadmium ion // inferred from electronic annotation		0000166 // nucleotide binding // inferred from electronic annotation /// 0003824 // catalytic activity // inferred from electronic annotation /// 0004363 // glutathione synthase activity // traceable author statement /// 0004363 // glutathione synthase activity // inferred from electronic annotation /// 0005524 // ATP binding // inferred from electronic annotation /// 0016874 // ligase activity /…	chr20:32979901-33007222 (-) // 99.95 // q11.22
GSS	2937	211630_s_at	0.338286	0.387898	0006520 // amino acid metabolic process // traceable author statement /// 0006750 // glutathione biosynthetic process // inferred from electronic annotation /// 0006979 // response to oxidative stress // traceable author statement /// 0007399 // nervous system development // traceable author statement /// 0046686 // response to cadmium ion // inferred from electronic annotation		0000166 // nucleotide binding // inferred from electronic annotation /// 0003824 // catalytic activity // inferred from electronic annotation /// 0004363 // glutathione synthase activity // traceable author statement /// 0004363 // glutathione synthase activity // inferred from electronic annotation /// 0005524 // ATP binding // inferred from electronic annotation /// 0016874 // ligase activity /…	chr20:32980065-33007221 (-) // 93.32 // q11.22
HDAC6	10013	206846_s_at	0.132785	0.216012	0000209 // protein polyubiquitination // inferred from electronic annotation /// 0006350 // transcription // inferred from electronic annotation /// 0006355 // regulation of transcription, DNA-dependent // inferred from electronic annotation /// 0006476 // protein amino acid deacetylation // inferred from electronic annotation /// 0007026 // negative regulation of microtubule depolymerization // …	0000118 // histone deacetylase complex // inferred from direct assay /// 0005634 // nucleus // non-traceable author statement /// 0005634 // nucleus // inferred from electronic annotation /// 0005737 // cytoplasm // inferred from sequence or structural similarity /// 0005737 // cytoplasm // inferred from electronic annotation /// 0005874 // microtubule // inferred from direct assay	0003779 // actin binding // inferred from electronic annotation /// 0004407 // histone deacetylase activity // inferred from electronic annotation /// 0005515 // protein binding // inferred from electronic annotation /// 0005515 // protein binding // inferred from physical interaction /// 0008270 // zinc ion binding // inferred from electronic annotation /// 0016566 // specific transcriptional re…	chrX:48545430-48568324 (+) // 100.0 // p11.23
HIF1A	3091	200989_at	0.806106	0.849135	0001525 // angiogenesis // inferred from electronic annotation /// 0001666 // response to hypoxia // inferred from direct assay /// 0001666 // response to hypoxia // inferred from mutant phenotype /// 0001755 // neural crest cell migration // inferred from electronic annotation /// 0001837 // epithelial to mesenchymal transition // inferred from electronic annotation /// 0001837 // epithelial to …	0005634 // nucleus // inferred from direct assay /// 0005634 // nucleus // inferred from electronic annotation /// 0005667 // transcription factor complex // inferred from physical interaction /// 0005730 // nucleolus // inferred from direct assay /// 0005737 // cytoplasm // inferred from electronic annotation /// 0005737 // cytoplasm // inferred from direct assay /// 0009434 // microtubule-based…	0003677 // DNA binding // inferred from electronic annotation /// 0003700 // transcription factor activity // inferred from electronic annotation /// 0003700 // transcription factor activity // inferred from direct assay /// 0003700 // transcription factor activity // traceable author statement /// 0003705 // RNA polymerase II transcription factor activity, enhancer binding // inferred from direc…	chr14:61232025-61284723 (+) // 99.08 // q23.2
HRAS	3265	212983_at	-0.149102	-0.612807	0006897 // endocytosis // inferred from electronic annotation /// 0006915 // apoptosis // inferred from electronic annotation /// 0006935 // chemotaxis // traceable author statement /// 0007165 // signal transduction // non-traceable author statement /// 0007166 // cell surface receptor linked signal transduction // traceable author statement /// 0007264 // small GTPase mediated signal transducti…	0000139 // Golgi membrane // inferred from electronic annotation /// 0005622 // intracellular // inferred from electronic annotation /// 0005624 // membrane fraction // inferred from electronic annotation /// 0005737 // cytoplasm // traceable author statement /// 0005794 // Golgi apparatus // inferred from electronic annotation /// 0005886 // plasma membrane // not recorded /// 0005886 // plasma …	0000166 // nucleotide binding // inferred from electronic annotation /// 0005515 // protein binding // inferred from physical interaction /// 0005515 // protein binding // inferred from electronic annotation /// 0005525 // GTP binding // inferred from electronic annotation /// 0008022 // protein C-terminus binding // inferred from physical interaction	chr11:522242-525538 (-) // 89.18 // p15.5
HSP90AA1	3320	210211_s_at	0.866218	0.721728	0006457 // protein folding // inferred from electronic annotation /// 0006839 // mitochondrial transport // traceable author statement /// 0006950 // response to stress // inferred from electronic annotation /// 0006986 // response to unfolded protein // non-traceable author statement /// 0007165 // signal transduction // non-traceable author statement /// 0034619 // cellular chaperone-mediated p…	0005737 // cytoplasm // inferred from electronic annotation /// 0005829 // cytosol // not recorded /// 0005829 // cytosol // non-traceable author statement /// 0042470 // melanosome // inferred from electronic annotation	0000166 // nucleotide binding // traceable author statement /// 0000166 // nucleotide binding // inferred from electronic annotation /// 0005515 // protein binding // inferred from electronic annotation /// 0005515 // protein binding // inferred from physical interaction /// 0005524 // ATP binding // traceable author statement /// 0005524 // ATP binding // inferred from electronic annotation /// …	chr11:27866300-27868487 (-) // 73.4 // p14.1 /// chr14:101617144-101621082 (-) // 72.85 // q32.31
HSP90AA1	3320	211968_s_at	1.30261	0.908165	0006457 // protein folding // inferred from electronic annotation /// 0006839 // mitochondrial transport // traceable author statement /// 0006950 // response to stress // inferred from electronic annotation /// 0006986 // response to unfolded protein // non-traceable author statement /// 0007165 // signal transduction // non-traceable author statement /// 0034619 // cellular chaperone-mediated p…	0005737 // cytoplasm // inferred from electronic annotation /// 0005829 // cytosol // not recorded /// 0005829 // cytosol // non-traceable author statement /// 0042470 // melanosome // inferred from electronic annotation	0000166 // nucleotide binding // traceable author statement /// 0000166 // nucleotide binding // inferred from electronic annotation /// 0005515 // protein binding // inferred from electronic annotation /// 0005515 // protein binding // inferred from physical interaction /// 0005524 // ATP binding // traceable author statement /// 0005524 // ATP binding // inferred from electronic annotation /// …	chr11:27866278-27869215 (-) // 89.51 // p14.1 /// chr14:101617137-101623134 (-) // 89.21 // q32.31
HSP90AA1	3320	211969_at	0.839296	0.740312	0006457 // protein folding // inferred from electronic annotation /// 0006839 // mitochondrial transport // traceable author statement /// 0006950 // response to stress // inferred from electronic annotation /// 0006986 // response to unfolded protein // non-traceable author statement /// 0007165 // signal transduction // non-traceable author statement /// 0034619 // cellular chaperone-mediated p…	0005737 // cytoplasm // inferred from electronic annotation /// 0005829 // cytosol // not recorded /// 0005829 // cytosol // non-traceable author statement /// 0042470 // melanosome // inferred from electronic annotation	0000166 // nucleotide binding // traceable author statement /// 0000166 // nucleotide binding // inferred from electronic annotation /// 0005515 // protein binding // inferred from electronic annotation /// 0005515 // protein binding // inferred from physical interaction /// 0005524 // ATP binding // traceable author statement /// 0005524 // ATP binding // inferred from electronic annotation /// …	chr11:27866278-27869215 (-) // 89.51 // p14.1 /// chr14:101617137-101623134 (-) // 89.21 // q32.31
HSP90AA1	3320	214328_s_at	0.663767	0.548827	0006457 // protein folding // inferred from electronic annotation /// 0006839 // mitochondrial transport // traceable author statement /// 0006950 // response to stress // inferred from electronic annotation /// 0006986 // response to unfolded protein // non-traceable author statement /// 0007165 // signal transduction // non-traceable author statement /// 0034619 // cellular chaperone-mediated p…	0005737 // cytoplasm // inferred from electronic annotation /// 0005829 // cytosol // not recorded /// 0005829 // cytosol // non-traceable author statement /// 0042470 // melanosome // inferred from electronic annotation	0000166 // nucleotide binding // traceable author statement /// 0000166 // nucleotide binding // inferred from electronic annotation /// 0005515 // protein binding // inferred from electronic annotation /// 0005515 // protein binding // inferred from physical interaction /// 0005524 // ATP binding // traceable author statement /// 0005524 // ATP binding // inferred from electronic annotation /// …	chr14:101617138-101617442 (-) // 87.83 // q32.31
HSP90AB1	3326	1557910_at	0.962361	0.780022	0006457 // protein folding // inferred from electronic annotation /// 0006950 // response to stress // inferred from electronic annotation /// 0006986 // response to unfolded protein // non-traceable author statement /// 0032435 // negative regulation of proteasomal ubiquitin-dependent protein catabolic process // inferred from mutant phenotype /// 0045429 // positive regulation of nitric oxide b…	0005737 // cytoplasm // non-traceable author statement /// 0005737 // cytoplasm // inferred from electronic annotation /// 0042470 // melanosome // inferred from electronic annotation	0000166 // nucleotide binding // inferred from electronic annotation /// 0005515 // protein binding // inferred from physical interaction /// 0005524 // ATP binding // inferred from electronic annotation /// 0030235 // nitric-oxide synthase regulator activity // inferred from sequence or structural similarity /// 0030911 // TPR domain binding // inferred from sequence or structural similarity ///…	chr6:44322809-44326047 (+) // 89.77 // p21.1
HSP90AB1	3326	200064_at	0.661632	0.541761	0006457 // protein folding // inferred from electronic annotation /// 0006950 // response to stress // inferred from electronic annotation /// 0006986 // response to unfolded protein // non-traceable author statement /// 0032435 // negative regulation of proteasomal ubiquitin-dependent protein catabolic process // inferred from mutant phenotype /// 0045429 // positive regulation of nitric oxide b…	0005737 // cytoplasm // non-traceable author statement /// 0005737 // cytoplasm // inferred from electronic annotation /// 0042470 // melanosome // inferred from electronic annotation	0000166 // nucleotide binding // inferred from electronic annotation /// 0005515 // protein binding // inferred from physical interaction /// 0005524 // ATP binding // inferred from electronic annotation /// 0030235 // nitric-oxide synthase regulator activity // inferred from sequence or structural similarity /// 0030911 // TPR domain binding // inferred from sequence or structural similarity ///…	chr4:89032294-89034297 (+) // 89.59 // q22.1 /// chr4:12947479-12949482 (+) // 83.74 // p15.33 /// chr6:44325220-44329431 (+) // 91.37 // p21.1
HSP90AB1	3326	214359_s_at	0.970339	0.823597	0006457 // protein folding // inferred from electronic annotation /// 0006950 // response to stress // inferred from electronic annotation /// 0006986 // response to unfolded protein // non-traceable author statement /// 0032435 // negative regulation of proteasomal ubiquitin-dependent protein catabolic process // inferred from mutant phenotype /// 0045429 // positive regulation of nitric oxide b…	0005737 // cytoplasm // non-traceable author statement /// 0005737 // cytoplasm // inferred from electronic annotation /// 0042470 // melanosome // inferred from electronic annotation	0000166 // nucleotide binding // inferred from electronic annotation /// 0005515 // protein binding // inferred from physical interaction /// 0005524 // ATP binding // inferred from electronic annotation /// 0030235 // nitric-oxide synthase regulator activity // inferred from sequence or structural similarity /// 0030911 // TPR domain binding // inferred from sequence or structural similarity ///…	chr6:44327296-44329600 (+) // 96.88 // p21.1
HSP90B1	7184	200598_s_at	-0.2362	-0.655354	0001666 // response to hypoxia // inferred from direct assay /// 0006457 // protein folding // inferred from electronic annotation /// 0006916 // anti-apoptosis // inferred from mutant phenotype /// 0006916 // anti-apoptosis // traceable author statement /// 0006950 // response to stress // inferred from electronic annotation /// 0015031 // protein transport // non-traceable author statement /// …	0005783 // endoplasmic reticulum // traceable author statement /// 0005783 // endoplasmic reticulum // inferred from electronic annotation /// 0005783 // endoplasmic reticulum // inferred from direct assay /// 0005788 // endoplasmic reticulum lumen // inferred from direct assay /// 0005788 // endoplasmic reticulum lumen // inferred from electronic annotation /// 0005789 // endoplasmic reticulum m…	0000166 // nucleotide binding // inferred from electronic annotation /// 0003723 // RNA binding // inferred from direct assay /// 0005509 // calcium ion binding // traceable author statement /// 0005509 // calcium ion binding // inferred from electronic annotation /// 0005515 // protein binding // inferred from physical interaction /// 0005524 // ATP binding // inferred from electronic annotation…	chr12:102848289-102865834 (+) // 88.64 // q23.3
HSP90B1	7184	200599_s_at	-0.384184	-0.754693	0001666 // response to hypoxia // inferred from direct assay /// 0006457 // protein folding // inferred from electronic annotation /// 0006916 // anti-apoptosis // inferred from mutant phenotype /// 0006916 // anti-apoptosis // traceable author statement /// 0006950 // response to stress // inferred from electronic annotation /// 0015031 // protein transport // non-traceable author statement /// …	0005783 // endoplasmic reticulum // traceable author statement /// 0005783 // endoplasmic reticulum // inferred from electronic annotation /// 0005783 // endoplasmic reticulum // inferred from direct assay /// 0005788 // endoplasmic reticulum lumen // inferred from direct assay /// 0005788 // endoplasmic reticulum lumen // inferred from electronic annotation /// 0005789 // endoplasmic reticulum m…	0000166 // nucleotide binding // inferred from electronic annotation /// 0003723 // RNA binding // inferred from direct assay /// 0005509 // calcium ion binding // traceable author statement /// 0005509 // calcium ion binding // inferred from electronic annotation /// 0005515 // protein binding // inferred from physical interaction /// 0005524 // ATP binding // inferred from electronic annotation…	chr12:102848318-102865833 (+) // 93.24 // q23.3 /// chr15:97615252-97618004 (+) // 87.27 // q26.3
HSP90B1	7184	216449_x_at	-0.094337	-0.450736	0001666 // response to hypoxia // inferred from direct assay /// 0006457 // protein folding // inferred from electronic annotation /// 0006916 // anti-apoptosis // inferred from mutant phenotype /// 0006916 // anti-apoptosis // traceable author statement /// 0006950 // response to stress // inferred from electronic annotation /// 0015031 // protein transport // non-traceable author statement /// …	0005783 // endoplasmic reticulum // traceable author statement /// 0005783 // endoplasmic reticulum // inferred from electronic annotation /// 0005783 // endoplasmic reticulum // inferred from direct assay /// 0005788 // endoplasmic reticulum lumen // inferred from direct assay /// 0005788 // endoplasmic reticulum lumen // inferred from electronic annotation /// 0005789 // endoplasmic reticulum m…	0000166 // nucleotide binding // inferred from electronic annotation /// 0003723 // RNA binding // inferred from direct assay /// 0005509 // calcium ion binding // traceable author statement /// 0005509 // calcium ion binding // inferred from electronic annotation /// 0005515 // protein binding // inferred from physical interaction /// 0005524 // ATP binding // inferred from electronic annotation…
HSP90B1	7184	216450_x_at	0.261514	-0.791025	0001666 // response to hypoxia // inferred from direct assay /// 0006457 // protein folding // inferred from electronic annotation /// 0006916 // anti-apoptosis // inferred from mutant phenotype /// 0006916 // anti-apoptosis // traceable author statement /// 0006950 // response to stress // inferred from electronic annotation /// 0015031 // protein transport // non-traceable author statement /// …	0005783 // endoplasmic reticulum // traceable author statement /// 0005783 // endoplasmic reticulum // inferred from electronic annotation /// 0005783 // endoplasmic reticulum // inferred from direct assay /// 0005788 // endoplasmic reticulum lumen // inferred from direct assay /// 0005788 // endoplasmic reticulum lumen // inferred from electronic annotation /// 0005789 // endoplasmic reticulum m…	0000166 // nucleotide binding // inferred from electronic annotation /// 0003723 // RNA binding // inferred from direct assay /// 0005509 // calcium ion binding // traceable author statement /// 0005509 // calcium ion binding // inferred from electronic annotation /// 0005515 // protein binding // inferred from physical interaction /// 0005524 // ATP binding // inferred from electronic annotation…
HSPA1A	3303	200799_at	0.120943	0.281877	0006402 // mRNA catabolic process // traceable author statement /// 0006916 // anti-apoptosis // traceable author statement /// 0006950 // response to stress // inferred from electronic annotation /// 0006986 // response to unfolded protein // traceable author statement	0005634 // nucleus // traceable author statement /// 0005737 // cytoplasm // traceable author statement /// 0005739 // mitochondrion // traceable author statement /// 0005783 // endoplasmic reticulum // traceable author statement	0000166 // nucleotide binding // inferred from electronic annotation /// 0005515 // protein binding // inferred from physical interaction /// 0005524 // ATP binding // inferred from electronic annotation /// 0051082 // unfolded protein binding // traceable author statement	chr6:31891315-31893702 (+) // 99.83 // p21.33 /// chr6:31903511-31905640 (+) // 87.93 // p21.32 /// chr6_cox_hap1:3229423-3231810 (+) // 99.96 // /// chr6_cox_hap1:3241621-3243750 (+) // 87.98 // /// chr6_qbl_hap2:3030930-3033317 (+) // 100.0 // /// chr6_qbl_hap2:3043130-3045259 (+) // 88.02 //
HSPA5	3309	211936_at	-0.856198	-1.11684	0006916 // anti-apoptosis // inferred from mutant phenotype /// 0006916 // anti-apoptosis // traceable author statement /// 0006950 // response to stress // inferred from electronic annotation /// 0006983 // ER overload response // inferred from electronic annotation /// 0042149 // cellular response to glucose starvation // inferred from direct assay /// 0043066 // negative regulation of apoptosi…	0005634 // nucleus // inferred from direct assay /// 0005783 // endoplasmic reticulum // traceable author statement /// 0005783 // endoplasmic reticulum // inferred from electronic annotation /// 0005783 // endoplasmic reticulum // inferred from direct assay /// 0005788 // endoplasmic reticulum lumen // traceable author statement /// 0005788 // endoplasmic reticulum lumen // inferred from electro…	0000166 // nucleotide binding // inferred from electronic annotation /// 0005509 // calcium ion binding // traceable author statement /// 0005515 // protein binding // inferred from electronic annotation /// 0005515 // protein binding // inferred from physical interaction /// 0005524 // ATP binding // non-traceable author statement /// 0005524 // ATP binding // inferred from electronic annotation…	chr9:127038344-127043444 (-) // 94.4 // q33.3
HSPA5	3309	230031_at	-2.4503	-2.56345	0006916 // anti-apoptosis // inferred from mutant phenotype /// 0006916 // anti-apoptosis // traceable author statement /// 0006950 // response to stress // inferred from electronic annotation /// 0006983 // ER overload response // inferred from electronic annotation /// 0042149 // cellular response to glucose starvation // inferred from direct assay /// 0043066 // negative regulation of apoptosi…	0005634 // nucleus // inferred from direct assay /// 0005783 // endoplasmic reticulum // traceable author statement /// 0005783 // endoplasmic reticulum // inferred from electronic annotation /// 0005783 // endoplasmic reticulum // inferred from direct assay /// 0005788 // endoplasmic reticulum lumen // traceable author statement /// 0005788 // endoplasmic reticulum lumen // inferred from electro…	0000166 // nucleotide binding // inferred from electronic annotation /// 0005509 // calcium ion binding // traceable author statement /// 0005515 // protein binding // inferred from electronic annotation /// 0005515 // protein binding // inferred from physical interaction /// 0005524 // ATP binding // non-traceable author statement /// 0005524 // ATP binding // inferred from electronic annotation…	chr9:127036949-127037412 (-) // 76.5 // q33.3
HSPB1	3315	201841_s_at	3.21363	2.63774	0006446 // regulation of translational initiation // traceable author statement /// 0006916 // anti-apoptosis // traceable author statement /// 0006928 // cell motion // traceable author statement /// 0006950 // response to stress // inferred from electronic annotation /// 0006986 // response to unfolded protein // traceable author statement /// 0008219 // cell death // inferred from electronic a…	0005634 // nucleus // inferred from electronic annotation /// 0005737 // cytoplasm // traceable author statement /// 0005737 // cytoplasm // inferred from electronic annotation /// 0005819 // spindle // inferred from electronic annotation /// 0005856 // cytoskeleton // traceable author statement /// 0009986 // cell surface // inferred from direct assay	0005515 // protein binding // inferred from physical interaction /// 0042802 // identical protein binding // inferred from physical interaction	chr7:75769858-75771548 (+) // 97.8 // q11.23
ICAM1	3383	202638_s_at	-0.330328	-0.176022	0001910 // regulation of leukocyte mediated cytotoxicity // traceable author statement /// 0002291 // T cell activation via T cell receptor contact with antigen bound to MHC molecule on antigen presenting cell // inferred from mutant phenotype /// 0002457 // T cell antigen processing and presentation // inferred from electronic annotation /// 0002693 // positive regulation of cellular extravasati…	0005615 // extracellular space // inferred from direct assay /// 0005737 // cytoplasm // inferred from direct assay /// 0005886 // plasma membrane // not recorded /// 0005886 // plasma membrane // non-traceable author statement /// 0005886 // plasma membrane // inferred from direct assay /// 0005887 // integral to plasma membrane // traceable author statement /// 0009897 // external side of plasm…	0004872 // receptor activity // inferred from electronic annotation /// 0004872 // receptor activity // traceable author statement /// 0004888 // transmembrane receptor activity // traceable author statement /// 0005178 // integrin binding // inferred from physical interaction /// 0005515 // protein binding // inferred from electronic annotation	chr19:10242778-10258291 (+) // 88.95 // p13.2
ICAM2	3384	204683_at	0.380084	0.543406	0007155 // cell adhesion // inferred from electronic annotation /// 0016337 // cell-cell adhesion // inferred from electronic annotation	0005886 // plasma membrane // not recorded /// 0005886 // plasma membrane // traceable author statement /// 0005887 // integral to plasma membrane // traceable author statement /// 0016020 // membrane // inferred from electronic annotation /// 0016021 // integral to membrane // inferred from electronic annotation	0005178 // integrin binding // traceable author statement /// 0005178 // integrin binding // inferred from physical interaction /// 0005515 // protein binding // inferred from electronic annotation	chr17:59433687-59437839 (-) // 99.9 // q23.3
ICAM3	3385	204949_at	1.41498	1.21352	0007155 // cell adhesion // inferred from electronic annotation /// 0016337 // cell-cell adhesion // inferred from electronic annotation	0005886 // plasma membrane // not recorded /// 0005886 // plasma membrane // non-traceable author statement /// 0005887 // integral to plasma membrane // traceable author statement /// 0016020 // membrane // inferred from electronic annotation /// 0016021 // integral to membrane // inferred from electronic annotation	0005102 // receptor binding // traceable author statement /// 0005178 // integrin binding // traceable author statement /// 0005178 // integrin binding // inferred from physical interaction /// 0005515 // protein binding // inferred from electronic annotation /// 0005515 // protein binding // inferred from physical interaction	chr19:10305453-10311300 (-) // 94.9 // p13.2
ITGB1	3688	1553530_a_at	-0.565825	-0.481402	0000082 // G1/S transition of mitotic cell cycle // inferred from electronic annotation /// 0001701 // in utero embryonic development // inferred from electronic annotation /// 0006968 // cellular defense response // traceable author statement /// 0007155 // cell adhesion // inferred from electronic annotation /// 0007156 // homophilic cell adhesion // traceable author statement /// 0007159 // le…	0001726 // ruffle // traceable author statement /// 0005886 // plasma membrane // inferred from electronic annotation /// 0005925 // focal adhesion // inferred from direct assay /// 0008305 // integrin complex // non-traceable author statement /// 0008305 // integrin complex // inferred from electronic annotation /// 0009986 // cell surface // inferred from direct assay /// 0016020 // membrane //…	0004872 // receptor activity // inferred from electronic annotation /// 0005178 // integrin binding // inferred from electronic annotation /// 0005488 // binding // inferred from electronic annotation /// 0005515 // protein binding // inferred from electronic annotation /// 0005515 // protein binding // inferred from physical interaction /// 0042802 // identical protein binding // inferred from p…	chr10:33230500-33264492 (-) // 96.04 // p11.22
ITGB1	3688	1553678_a_at	-0.736416	-0.583935	0000082 // G1/S transition of mitotic cell cycle // inferred from electronic annotation /// 0001701 // in utero embryonic development // inferred from electronic annotation /// 0006968 // cellular defense response // traceable author statement /// 0007155 // cell adhesion // inferred from electronic annotation /// 0007156 // homophilic cell adhesion // traceable author statement /// 0007159 // le…	0001726 // ruffle // traceable author statement /// 0005886 // plasma membrane // inferred from electronic annotation /// 0005925 // focal adhesion // inferred from direct assay /// 0008305 // integrin complex // non-traceable author statement /// 0008305 // integrin complex // inferred from electronic annotation /// 0009986 // cell surface // inferred from direct assay /// 0016020 // membrane //…	0004872 // receptor activity // inferred from electronic annotation /// 0005178 // integrin binding // inferred from electronic annotation /// 0005488 // binding // inferred from electronic annotation /// 0005515 // protein binding // inferred from electronic annotation /// 0005515 // protein binding // inferred from physical interaction /// 0042802 // identical protein binding // inferred from p…	chr10:33230185-33286828 (-) // 93.49 // p11.22
ITGB1	3688	1561042_at	0.38635	-0.44325	0000082 // G1/S transition of mitotic cell cycle // inferred from electronic annotation /// 0001701 // in utero embryonic development // inferred from electronic annotation /// 0006968 // cellular defense response // traceable author statement /// 0007155 // cell adhesion // inferred from electronic annotation /// 0007156 // homophilic cell adhesion // traceable author statement /// 0007159 // le…	0001726 // ruffle // traceable author statement /// 0005886 // plasma membrane // inferred from electronic annotation /// 0005925 // focal adhesion // inferred from direct assay /// 0008305 // integrin complex // non-traceable author statement /// 0008305 // integrin complex // inferred from electronic annotation /// 0009986 // cell surface // inferred from direct assay /// 0016020 // membrane //…	0004872 // receptor activity // inferred from electronic annotation /// 0005178 // integrin binding // inferred from electronic annotation /// 0005488 // binding // inferred from electronic annotation /// 0005515 // protein binding // inferred from electronic annotation /// 0005515 // protein binding // inferred from physical interaction /// 0042802 // identical protein binding // inferred from p…	chr10:33237349-33240424 (-) // 70.23 // p11.22 /// chr19:14593556-14593951 (-) // 70.23 // p13.12
ITGB1	3688	211945_s_at	-0.562263	-0.506093	0000082 // G1/S transition of mitotic cell cycle // inferred from electronic annotation /// 0001701 // in utero embryonic development // inferred from electronic annotation /// 0006968 // cellular defense response // traceable author statement /// 0007155 // cell adhesion // inferred from electronic annotation /// 0007156 // homophilic cell adhesion // traceable author statement /// 0007159 // le…	0001726 // ruffle // traceable author statement /// 0005886 // plasma membrane // inferred from electronic annotation /// 0005925 // focal adhesion // inferred from direct assay /// 0008305 // integrin complex // non-traceable author statement /// 0008305 // integrin complex // inferred from electronic annotation /// 0009986 // cell surface // inferred from direct assay /// 0016020 // membrane //…	0004872 // receptor activity // inferred from electronic annotation /// 0005178 // integrin binding // inferred from electronic annotation /// 0005488 // binding // inferred from electronic annotation /// 0005515 // protein binding // inferred from electronic annotation /// 0005515 // protein binding // inferred from physical interaction /// 0042802 // identical protein binding // inferred from p…	chr10:33229251-33264494 (-) // 94.41 // p11.22
ITGB1	3688	216178_x_at	-0.00501961	-0.0044412	0000082 // G1/S transition of mitotic cell cycle // inferred from electronic annotation /// 0001701 // in utero embryonic development // inferred from electronic annotation /// 0006968 // cellular defense response // traceable author statement /// 0007155 // cell adhesion // inferred from electronic annotation /// 0007156 // homophilic cell adhesion // traceable author statement /// 0007159 // le…	0001726 // ruffle // traceable author statement /// 0005886 // plasma membrane // inferred from electronic annotation /// 0005925 // focal adhesion // inferred from direct assay /// 0008305 // integrin complex // non-traceable author statement /// 0008305 // integrin complex // inferred from electronic annotation /// 0009986 // cell surface // inferred from direct assay /// 0016020 // membrane //…	0004872 // receptor activity // inferred from electronic annotation /// 0005178 // integrin binding // inferred from electronic annotation /// 0005488 // binding // inferred from electronic annotation /// 0005515 // protein binding // inferred from electronic annotation /// 0005515 // protein binding // inferred from physical interaction /// 0042802 // identical protein binding // inferred from p…	chr10:33230480-33237379 (-) // 90.44 // p11.22
KIAA0368	23392	212427_at	-2.26688	-1.71238	0030433 // ER-associated protein catabolic process // inferred from mutant phenotype	0000502 // proteasome complex // inferred from direct assay /// 0005634 // nucleus // inferred from direct assay /// 0005634 // nucleus // inferred from electronic annotation /// 0005768 // endosome // inferred from electronic annotation /// 0005769 // early endosome // inferred from direct assay /// 0005770 // late endosome // inferred from direct assay /// 0005783 // endoplasmic reticulum // in…	0005488 // binding // inferred from electronic annotation	chr9:113162788-113253634 (-) // 97.63 // q31.3
KIAA0368	23392	212428_at	0.0196257	0.024467	0030433 // ER-associated protein catabolic process // inferred from mutant phenotype	0000502 // proteasome complex // inferred from direct assay /// 0005634 // nucleus // inferred from direct assay /// 0005634 // nucleus // inferred from electronic annotation /// 0005768 // endosome // inferred from electronic annotation /// 0005769 // early endosome // inferred from direct assay /// 0005770 // late endosome // inferred from direct assay /// 0005783 // endoplasmic reticulum // in…	0005488 // binding // inferred from electronic annotation	chr9:113162788-113253634 (-) // 97.63 // q31.3
KIAA0368	23392	214356_s_at	-0.11912	-0.140483	0030433 // ER-associated protein catabolic process // inferred from mutant phenotype	0000502 // proteasome complex // inferred from direct assay /// 0005634 // nucleus // inferred from direct assay /// 0005634 // nucleus // inferred from electronic annotation /// 0005768 // endosome // inferred from electronic annotation /// 0005769 // early endosome // inferred from direct assay /// 0005770 // late endosome // inferred from direct assay /// 0005783 // endoplasmic reticulum // in…	0005488 // binding // inferred from electronic annotation	chr9:113163989-113164396 (-) // 81.65 // q31.3
KIAA0368	23392	236368_at	-1.09632	-0.37304	0030433 // ER-associated protein catabolic process // inferred from mutant phenotype	0000502 // proteasome complex // inferred from direct assay /// 0005634 // nucleus // inferred from direct assay /// 0005634 // nucleus // inferred from electronic annotation /// 0005768 // endosome // inferred from electronic annotation /// 0005769 // early endosome // inferred from direct assay /// 0005770 // late endosome // inferred from direct assay /// 0005783 // endoplasmic reticulum // in…	0005488 // binding // inferred from electronic annotation	chr9:113165893-113166355 (-) // 93.42 // q31.3
KRAS	3845	1559203_s_at	-0.0729024	0.247186	0006897 // endocytosis // inferred from electronic annotation /// 0006915 // apoptosis // inferred from electronic annotation /// 0007264 // small GTPase mediated signal transduction // inferred from electronic annotation /// 0007265 // Ras protein signal transduction // not recorded /// 0007265 // Ras protein signal transduction // inferred from electronic annotation /// 0007569 // cell aging //…	0005622 // intracellular // inferred from electronic annotation /// 0005624 // membrane fraction // inferred from electronic annotation /// 0005886 // plasma membrane // not recorded /// 0005886 // plasma membrane // inferred from electronic annotation /// 0016020 // membrane // inferred from electronic annotation	0000166 // nucleotide binding // inferred from electronic annotation /// 0005515 // protein binding // inferred from physical interaction /// 0005515 // protein binding // inferred from electronic annotation /// 0005525 // GTP binding // inferred from electronic annotation	chr12:25278035-25295130 (-) // 85.17 // p12.1
KRAS	3845	204009_s_at	-0.935029	-0.863821	0006897 // endocytosis // inferred from electronic annotation /// 0006915 // apoptosis // inferred from electronic annotation /// 0007264 // small GTPase mediated signal transduction // inferred from electronic annotation /// 0007265 // Ras protein signal transduction // not recorded /// 0007265 // Ras protein signal transduction // inferred from electronic annotation /// 0007569 // cell aging //…	0005622 // intracellular // inferred from electronic annotation /// 0005624 // membrane fraction // inferred from electronic annotation /// 0005886 // plasma membrane // not recorded /// 0005886 // plasma membrane // inferred from electronic annotation /// 0016020 // membrane // inferred from electronic annotation	0000166 // nucleotide binding // inferred from electronic annotation /// 0005515 // protein binding // inferred from physical interaction /// 0005515 // protein binding // inferred from electronic annotation /// 0005525 // GTP binding // inferred from electronic annotation	chr12:25248989-25295132 (-) // 89.37 // p12.1
KRAS	3845	204010_s_at	0.039501	0.135518	0006897 // endocytosis // inferred from electronic annotation /// 0006915 // apoptosis // inferred from electronic annotation /// 0007264 // small GTPase mediated signal transduction // inferred from electronic annotation /// 0007265 // Ras protein signal transduction // not recorded /// 0007265 // Ras protein signal transduction // inferred from electronic annotation /// 0007569 // cell aging //…	0005622 // intracellular // inferred from electronic annotation /// 0005624 // membrane fraction // inferred from electronic annotation /// 0005886 // plasma membrane // not recorded /// 0005886 // plasma membrane // inferred from electronic annotation /// 0016020 // membrane // inferred from electronic annotation	0000166 // nucleotide binding // inferred from electronic annotation /// 0005515 // protein binding // inferred from physical interaction /// 0005515 // protein binding // inferred from electronic annotation /// 0005525 // GTP binding // inferred from electronic annotation	chr12:25248989-25295132 (-) // 89.42 // p12.1
KRAS	3845	214352_s_at	-0.98191	-0.793359	0006897 // endocytosis // inferred from electronic annotation /// 0006915 // apoptosis // inferred from electronic annotation /// 0007264 // small GTPase mediated signal transduction // inferred from electronic annotation /// 0007265 // Ras protein signal transduction // not recorded /// 0007265 // Ras protein signal transduction // inferred from electronic annotation /// 0007569 // cell aging //…	0005622 // intracellular // inferred from electronic annotation /// 0005624 // membrane fraction // inferred from electronic annotation /// 0005886 // plasma membrane // not recorded /// 0005886 // plasma membrane // inferred from electronic annotation /// 0016020 // membrane // inferred from electronic annotation	0000166 // nucleotide binding // inferred from electronic annotation /// 0005515 // protein binding // inferred from physical interaction /// 0005515 // protein binding // inferred from electronic annotation /// 0005525 // GTP binding // inferred from electronic annotation	chr12:25253386-25254011 (-) // 93.44 // p12.1
MAP1LC3A	84557	224378_x_at	-1.00987	-0.89195	0000045 // autophagic vacuole formation // inferred from sequence or structural similarity /// 0000045 // autophagic vacuole formation // inferred from electronic annotation /// 0006914 // autophagy // inferred from electronic annotation /// 0019941 // modification-dependent protein catabolic process // inferred from electronic annotation	0005737 // cytoplasm // inferred from electronic annotation /// 0005776 // autophagic vacuole // inferred from direct assay /// 0005776 // autophagic vacuole // inferred from electronic annotation /// 0005829 // cytosol // inferred from direct assay /// 0005874 // microtubule // inferred from electronic annotation /// 0012505 // endomembrane system // inferred from electronic annotation /// 00160…	0005515 // protein binding // inferred from physical interaction /// 0005515 // protein binding // inferred from electronic annotation /// 0005543 // phospholipid binding // inferred from direct assay /// 0008429 // phosphatidylethanolamine binding // inferred from direct assay	chr20:32610186-32611810 (+) // 93.11 // q11.22
MAP1LC3A	84557	227219_x_at	-2.12313	-1.86259	0000045 // autophagic vacuole formation // inferred from sequence or structural similarity /// 0000045 // autophagic vacuole formation // inferred from electronic annotation /// 0006914 // autophagy // inferred from electronic annotation /// 0019941 // modification-dependent protein catabolic process // inferred from electronic annotation	0005737 // cytoplasm // inferred from electronic annotation /// 0005776 // autophagic vacuole // inferred from direct assay /// 0005776 // autophagic vacuole // inferred from electronic annotation /// 0005829 // cytosol // inferred from direct assay /// 0005874 // microtubule // inferred from electronic annotation /// 0012505 // endomembrane system // inferred from electronic annotation /// 00160…	0005515 // protein binding // inferred from physical interaction /// 0005515 // protein binding // inferred from electronic annotation /// 0005543 // phospholipid binding // inferred from direct assay /// 0008429 // phosphatidylethanolamine binding // inferred from direct assay	chr20:32610186-32611810 (+) // 95.04 // q11.22
MAP1LC3A	84557	232011_s_at	-0.290896	-0.257498	0000045 // autophagic vacuole formation // inferred from sequence or structural similarity /// 0000045 // autophagic vacuole formation // inferred from electronic annotation /// 0006914 // autophagy // inferred from electronic annotation /// 0019941 // modification-dependent protein catabolic process // inferred from electronic annotation	0005737 // cytoplasm // inferred from electronic annotation /// 0005776 // autophagic vacuole // inferred from direct assay /// 0005776 // autophagic vacuole // inferred from electronic annotation /// 0005829 // cytosol // inferred from direct assay /// 0005874 // microtubule // inferred from electronic annotation /// 0012505 // endomembrane system // inferred from electronic annotation /// 00160…	0005515 // protein binding // inferred from physical interaction /// 0005515 // protein binding // inferred from electronic annotation /// 0005543 // phospholipid binding // inferred from direct assay /// 0008429 // phosphatidylethanolamine binding // inferred from direct assay	chr20:32601368-32611589 (+) // 76.06 // q11.22
MAP1LC3B	81631	208785_s_at	-1.77265	-1.48022	0006914 // autophagy // inferred from electronic annotation /// 0019941 // modification-dependent protein catabolic process // inferred from electronic annotation	0005622 // intracellular // inferred from direct assay /// 0005737 // cytoplasm // inferred from electronic annotation /// 0005776 // autophagic vacuole // inferred from sequence or structural similarity /// 0005874 // microtubule // inferred from electronic annotation /// 0012505 // endomembrane system // inferred from electronic annotation /// 0016020 // membrane // inferred from electronic ann…	0005515 // protein binding // inferred from physical interaction	chr16:85983442-85995881 (+) // 94.02 // q24.2
MAP1LC3B	81631	208786_s_at	-3.06299	-2.48373	0006914 // autophagy // inferred from electronic annotation /// 0019941 // modification-dependent protein catabolic process // inferred from electronic annotation	0005622 // intracellular // inferred from direct assay /// 0005737 // cytoplasm // inferred from electronic annotation /// 0005776 // autophagic vacuole // inferred from sequence or structural similarity /// 0005874 // microtubule // inferred from electronic annotation /// 0012505 // endomembrane system // inferred from electronic annotation /// 0016020 // membrane // inferred from electronic ann…	0005515 // protein binding // inferred from physical interaction	chr12:115498041-115498781 (+) // 37.53 // q24.22 /// chr16:85983442-85995666 (+) // 94.32 // q24.2
MAPK12	6300	206106_at	1.2188	1.1239	0006468 // protein amino acid phosphorylation // inferred from electronic annotation /// 0006975 // DNA damage induced protein phosphorylation // traceable author statement /// 0007049 // cell cycle // inferred from electronic annotation /// 0007050 // cell cycle arrest // traceable author statement /// 0007165 // signal transduction // traceable author statement /// 0007242 // intracellular sign…	0005737 // cytoplasm // inferred from electronic annotation /// 0005739 // mitochondrion // inferred from electronic annotation	0000166 // nucleotide binding // inferred from electronic annotation /// 0000287 // magnesium ion binding // inferred from direct assay /// 0000287 // magnesium ion binding // inferred from electronic annotation /// 0004672 // protein kinase activity // inferred from electronic annotation /// 0004674 // protein serine/threonine kinase activity // inferred from direct assay /// 0004674 // protein …	chr22:49033459-49042376 (-) // 91.52 // q13.33
MAPK13	5603	210058_at	-0.0500984	-0.0871683	0006468 // protein amino acid phosphorylation // inferred from electronic annotation /// 0006950 // response to stress // inferred from direct assay /// 0007049 // cell cycle // inferred from electronic annotation /// 0007243 // protein kinase cascade // inferred from direct assay /// 0007265 // Ras protein signal transduction // not recorded		0000166 // nucleotide binding // inferred from electronic annotation /// 0004672 // protein kinase activity // inferred from electronic annotation /// 0004674 // protein serine/threonine kinase activity // inferred from direct assay /// 0004674 // protein serine/threonine kinase activity // inferred from electronic annotation /// 0004707 // MAP kinase activity // inferred from electronic annotati…	chr6:36206296-36215805 (+) // 78.3 // p21.31
MAPK13	5603	210059_s_at	0.00466827	-0.233726	0006468 // protein amino acid phosphorylation // inferred from electronic annotation /// 0006950 // response to stress // inferred from direct assay /// 0007049 // cell cycle // inferred from electronic annotation /// 0007243 // protein kinase cascade // inferred from direct assay /// 0007265 // Ras protein signal transduction // not recorded		0000166 // nucleotide binding // inferred from electronic annotation /// 0004672 // protein kinase activity // inferred from electronic annotation /// 0004674 // protein serine/threonine kinase activity // inferred from direct assay /// 0004674 // protein serine/threonine kinase activity // inferred from electronic annotation /// 0004707 // MAP kinase activity // inferred from electronic annotati…	chr6:36206296-36215805 (+) // 78.3 // p21.31
MAPK14	1432	202530_at	0.146859	0.0118351	0006468 // protein amino acid phosphorylation // inferred from electronic annotation /// 0006928 // cell motion // traceable author statement /// 0006935 // chemotaxis // traceable author statement /// 0006950 // response to stress // inferred from direct assay /// 0007165 // signal transduction // traceable author statement /// 0007166 // cell surface receptor linked signal transduction // trace…	0005634 // nucleus // inferred from sequence or structural similarity /// 0005634 // nucleus // inferred from electronic annotation /// 0005654 // nucleoplasm // not recorded /// 0005737 // cytoplasm // inferred from sequence or structural similarity /// 0005737 // cytoplasm // inferred from electronic annotation /// 0005829 // cytosol // not recorded	0000166 // nucleotide binding // inferred from electronic annotation /// 0004672 // protein kinase activity // inferred from electronic annotation /// 0004674 // protein serine/threonine kinase activity // not recorded /// 0004674 // protein serine/threonine kinase activity // inferred from electronic annotation /// 0004707 // MAP kinase activity // inferred from electronic annotation /// 0004708…	chr6:36103550-36186513 (+) // 98.64 // p21.31
MAPK14	1432	210449_x_at	0.695567	0.426852	0006468 // protein amino acid phosphorylation // inferred from electronic annotation /// 0006928 // cell motion // traceable author statement /// 0006935 // chemotaxis // traceable author statement /// 0006950 // response to stress // inferred from direct assay /// 0007165 // signal transduction // traceable author statement /// 0007166 // cell surface receptor linked signal transduction // trace…	0005634 // nucleus // inferred from sequence or structural similarity /// 0005634 // nucleus // inferred from electronic annotation /// 0005654 // nucleoplasm // not recorded /// 0005737 // cytoplasm // inferred from sequence or structural similarity /// 0005737 // cytoplasm // inferred from electronic annotation /// 0005829 // cytosol // not recorded	0000166 // nucleotide binding // inferred from electronic annotation /// 0004672 // protein kinase activity // inferred from electronic annotation /// 0004674 // protein serine/threonine kinase activity // not recorded /// 0004674 // protein serine/threonine kinase activity // inferred from electronic annotation /// 0004707 // MAP kinase activity // inferred from electronic annotation /// 0004708…	chr6:36103897-36184239 (+) // 100.0 // p21.31
MAPK14	1432	211561_x_at	0.664781	0.37247	0006468 // protein amino acid phosphorylation // inferred from electronic annotation /// 0006928 // cell motion // traceable author statement /// 0006935 // chemotaxis // traceable author statement /// 0006950 // response to stress // inferred from direct assay /// 0007165 // signal transduction // traceable author statement /// 0007166 // cell surface receptor linked signal transduction // trace…	0005634 // nucleus // inferred from sequence or structural similarity /// 0005634 // nucleus // inferred from electronic annotation /// 0005654 // nucleoplasm // not recorded /// 0005737 // cytoplasm // inferred from sequence or structural similarity /// 0005737 // cytoplasm // inferred from electronic annotation /// 0005829 // cytosol // not recorded	0000166 // nucleotide binding // inferred from electronic annotation /// 0004672 // protein kinase activity // inferred from electronic annotation /// 0004674 // protein serine/threonine kinase activity // not recorded /// 0004674 // protein serine/threonine kinase activity // inferred from electronic annotation /// 0004707 // MAP kinase activity // inferred from electronic annotation /// 0004708…	chr6:36103894-36184364 (+) // 79.34 // p21.31
MAPK3	5595	212046_x_at	-0.181749	0.111715	0006468 // protein amino acid phosphorylation // inferred from direct assay /// 0006468 // protein amino acid phosphorylation // inferred from electronic annotation /// 0007049 // cell cycle // inferred from electronic annotation /// 0007265 // Ras protein signal transduction // not recorded /// 0044419 // interspecies interaction between organisms // inferred from electronic annotation	0005634 // nucleus // inferred from direct assay /// 0005654 // nucleoplasm // not recorded /// 0005730 // nucleolus // inferred from direct assay /// 0005829 // cytosol // not recorded /// 0005856 // cytoskeleton // inferred from direct assay	0000166 // nucleotide binding // inferred from electronic annotation /// 0004672 // protein kinase activity // inferred from electronic annotation /// 0004674 // protein serine/threonine kinase activity // not recorded /// 0004674 // protein serine/threonine kinase activity // inferred from electronic annotation /// 0004707 // MAP kinase activity // not recorded /// 0004707 // MAP kinase activity…	chr16:30032448-30042058 (-) // 94.16 // p11.2
MAPK6	5597	207121_s_at	-0.468294	-0.282136	0006468 // protein amino acid phosphorylation // traceable author statement /// 0006468 // protein amino acid phosphorylation // inferred from electronic annotation /// 0007049 // cell cycle // inferred from electronic annotation /// 0007165 // signal transduction // traceable author statement	0005737 // cytoplasm // inferred from electronic annotation	0000166 // nucleotide binding // inferred from electronic annotation /// 0004672 // protein kinase activity // inferred from electronic annotation /// 0004674 // protein serine/threonine kinase activity // traceable author statement /// 0004674 // protein serine/threonine kinase activity // inferred from electronic annotation /// 0004707 // MAP kinase activity // inferred from electronic annotati…	chr15:50125471-50145753 (+) // 96.33 // q21.2 /// chr8:54611712-54616679 (+) // 90.51 // q11.23 /// chr8:110551542-110553656 (+) // 50.71 // q23.1 /// chr13:41539852-41543714 (-) // 92.17 // q14.11
MAPK7	5598	35617_at	0.216739	0.134008	0006468 // protein amino acid phosphorylation // inferred from electronic annotation /// 0006915 // apoptosis // inferred from electronic annotation /// 0007049 // cell cycle // inferred from electronic annotation /// 0007165 // signal transduction // traceable author statement /// 0030154 // cell differentiation // inferred from electronic annotation /// 0045765 // regulation of angiogenesis // …	0005634 // nucleus // inferred from electronic annotation /// 0005654 // nucleoplasm // not recorded /// 0005737 // cytoplasm // inferred from electronic annotation	0000166 // nucleotide binding // inferred from electronic annotation /// 0004672 // protein kinase activity // inferred from electronic annotation /// 0004674 // protein serine/threonine kinase activity // not recorded /// 0004674 // protein serine/threonine kinase activity // inferred from electronic annotation /// 0004707 // MAP kinase activity // traceable author statement /// 0004707 // MAP k…	chr17:19221791-19227445 (+) // 86.55 // p11.2
MCL1	4170	200796_s_at	0.968837	0.504954	0001709 // cell fate determination // non-traceable author statement /// 0006915 // apoptosis // inferred from direct assay /// 0006915 // apoptosis // inferred from electronic annotation /// 0006916 // anti-apoptosis // traceable author statement /// 0007275 // multicellular organismal development // traceable author statement /// 0007275 // multicellular organismal development // inferred from …	0005634 // nucleus // inferred from electronic annotation /// 0005737 // cytoplasm // traceable author statement /// 0005737 // cytoplasm // inferred from electronic annotation /// 0005739 // mitochondrion // inferred from electronic annotation /// 0005739 // mitochondrion // inferred from direct assay /// 0005741 // mitochondrial outer membrane // traceable author statement /// 0016020 // membra…	0005515 // protein binding // inferred from direct assay /// 0005515 // protein binding // inferred from electronic annotation /// 0005515 // protein binding // inferred from physical interaction /// 0015266 // protein channel activity // traceable author statement /// 0046982 // protein heterodimerization activity // inferred from physical interaction	chr1:148813656-148818871 (-) // 98.7 // q21.2
MCL1	4170	200797_s_at	-0.482721	-0.584827	0001709 // cell fate determination // non-traceable author statement /// 0006915 // apoptosis // inferred from direct assay /// 0006915 // apoptosis // inferred from electronic annotation /// 0006916 // anti-apoptosis // traceable author statement /// 0007275 // multicellular organismal development // traceable author statement /// 0007275 // multicellular organismal development // inferred from …	0005634 // nucleus // inferred from electronic annotation /// 0005737 // cytoplasm // traceable author statement /// 0005737 // cytoplasm // inferred from electronic annotation /// 0005739 // mitochondrion // inferred from electronic annotation /// 0005739 // mitochondrion // inferred from direct assay /// 0005741 // mitochondrial outer membrane // traceable author statement /// 0016020 // membra…	0005515 // protein binding // inferred from direct assay /// 0005515 // protein binding // inferred from electronic annotation /// 0005515 // protein binding // inferred from physical interaction /// 0015266 // protein channel activity // traceable author statement /// 0046982 // protein heterodimerization activity // inferred from physical interaction	chr1:148813656-148818871 (-) // 98.7 // q21.2
MCL1	4170	200798_x_at	0.35233	-0.0325528	0001709 // cell fate determination // non-traceable author statement /// 0006915 // apoptosis // inferred from direct assay /// 0006915 // apoptosis // inferred from electronic annotation /// 0006916 // anti-apoptosis // traceable author statement /// 0007275 // multicellular organismal development // traceable author statement /// 0007275 // multicellular organismal development // inferred from …	0005634 // nucleus // inferred from electronic annotation /// 0005737 // cytoplasm // traceable author statement /// 0005737 // cytoplasm // inferred from electronic annotation /// 0005739 // mitochondrion // inferred from electronic annotation /// 0005739 // mitochondrion // inferred from direct assay /// 0005741 // mitochondrial outer membrane // traceable author statement /// 0016020 // membra…	0005515 // protein binding // inferred from direct assay /// 0005515 // protein binding // inferred from electronic annotation /// 0005515 // protein binding // inferred from physical interaction /// 0015266 // protein channel activity // traceable author statement /// 0046982 // protein heterodimerization activity // inferred from physical interaction	chr1:148815167-148818679 (-) // 99.01 // q21.2
MCL1	4170	214056_at	0.656178	-0.302999	0001709 // cell fate determination // non-traceable author statement /// 0006915 // apoptosis // inferred from direct assay /// 0006915 // apoptosis // inferred from electronic annotation /// 0006916 // anti-apoptosis // traceable author statement /// 0007275 // multicellular organismal development // traceable author statement /// 0007275 // multicellular organismal development // inferred from …	0005634 // nucleus // inferred from electronic annotation /// 0005737 // cytoplasm // traceable author statement /// 0005737 // cytoplasm // inferred from electronic annotation /// 0005739 // mitochondrion // inferred from electronic annotation /// 0005739 // mitochondrion // inferred from direct assay /// 0005741 // mitochondrial outer membrane // traceable author statement /// 0016020 // membra…	0005515 // protein binding // inferred from direct assay /// 0005515 // protein binding // inferred from electronic annotation /// 0005515 // protein binding // inferred from physical interaction /// 0015266 // protein channel activity // traceable author statement /// 0046982 // protein heterodimerization activity // inferred from physical interaction	chr1:148813590-148815653 (+) // 98.51 // q21.2
MCL1	4170	214057_at	-0.278302	-0.505399	0001709 // cell fate determination // non-traceable author statement /// 0006915 // apoptosis // inferred from direct assay /// 0006915 // apoptosis // inferred from electronic annotation /// 0006916 // anti-apoptosis // traceable author statement /// 0007275 // multicellular organismal development // traceable author statement /// 0007275 // multicellular organismal development // inferred from …	0005634 // nucleus // inferred from electronic annotation /// 0005737 // cytoplasm // traceable author statement /// 0005737 // cytoplasm // inferred from electronic annotation /// 0005739 // mitochondrion // inferred from electronic annotation /// 0005739 // mitochondrion // inferred from direct assay /// 0005741 // mitochondrial outer membrane // traceable author statement /// 0016020 // membra…	0005515 // protein binding // inferred from direct assay /// 0005515 // protein binding // inferred from electronic annotation /// 0005515 // protein binding // inferred from physical interaction /// 0015266 // protein channel activity // traceable author statement /// 0046982 // protein heterodimerization activity // inferred from physical interaction	chr1:148813590-148815653 (+) // 98.51 // q21.2
MDM2	4193	205386_s_at	0	0	0000122 // negative regulation of transcription from RNA polymerase II promoter // inferred from direct assay /// 0000122 // negative regulation of transcription from RNA polymerase II promoter // inferred from sequence or structural similarity /// 0006461 // protein complex assembly // inferred from direct assay /// 0007089 // traversing start control point of mitotic cell cycle // inferred from…	0005622 // intracellular // inferred from electronic annotation /// 0005626 // insoluble fraction // inferred from direct assay /// 0005634 // nucleus // inferred from electronic annotation /// 0005654 // nucleoplasm // not recorded /// 0005654 // nucleoplasm // inferred from direct assay /// 0005730 // nucleolus // inferred from direct assay /// 0005730 // nucleolus // inferred from electronic a…	0002039 // p53 binding // inferred from electronic annotation /// 0004842 // ubiquitin-protein ligase activity // inferred from direct assay /// 0004842 // ubiquitin-protein ligase activity // inferred from electronic annotation /// 0005515 // protein binding // inferred from electronic annotation /// 0005515 // protein binding // inferred from physical interaction /// 0008270 // zinc ion binding…	chr12:67488237-67520481 (+) // 87.73 // q15
MDM2	4193	225160_x_at	-0.436102	-0.466317	0000122 // negative regulation of transcription from RNA polymerase II promoter // inferred from direct assay /// 0000122 // negative regulation of transcription from RNA polymerase II promoter // inferred from sequence or structural similarity /// 0006461 // protein complex assembly // inferred from direct assay /// 0007089 // traversing start control point of mitotic cell cycle // inferred from…	0005622 // intracellular // inferred from electronic annotation /// 0005626 // insoluble fraction // inferred from direct assay /// 0005634 // nucleus // inferred from electronic annotation /// 0005654 // nucleoplasm // not recorded /// 0005654 // nucleoplasm // inferred from direct assay /// 0005730 // nucleolus // inferred from direct assay /// 0005730 // nucleolus // inferred from electronic a…	0002039 // p53 binding // inferred from electronic annotation /// 0004842 // ubiquitin-protein ligase activity // inferred from direct assay /// 0004842 // ubiquitin-protein ligase activity // inferred from electronic annotation /// 0005515 // protein binding // inferred from electronic annotation /// 0005515 // protein binding // inferred from physical interaction /// 0008270 // zinc ion binding…	chr12:67521013-67524318 (+) // 84.47 // q15
MDM2	4193	229711_s_at	-0.195285	-0.28748	0000122 // negative regulation of transcription from RNA polymerase II promoter // inferred from direct assay /// 0000122 // negative regulation of transcription from RNA polymerase II promoter // inferred from sequence or structural similarity /// 0006461 // protein complex assembly // inferred from direct assay /// 0007089 // traversing start control point of mitotic cell cycle // inferred from…	0005622 // intracellular // inferred from electronic annotation /// 0005626 // insoluble fraction // inferred from direct assay /// 0005634 // nucleus // inferred from electronic annotation /// 0005654 // nucleoplasm // not recorded /// 0005654 // nucleoplasm // inferred from direct assay /// 0005730 // nucleolus // inferred from direct assay /// 0005730 // nucleolus // inferred from electronic a…	0002039 // p53 binding // inferred from electronic annotation /// 0004842 // ubiquitin-protein ligase activity // inferred from direct assay /// 0004842 // ubiquitin-protein ligase activity // inferred from electronic annotation /// 0005515 // protein binding // inferred from electronic annotation /// 0005515 // protein binding // inferred from physical interaction /// 0008270 // zinc ion binding…	chr12:67522502-67524310 (+) // 94.67 // q15
MSH2	4436	209421_at	2.49788	2.31144	0001701 // in utero embryonic development // inferred from electronic annotation /// 0002204 // somatic recombination of immunoglobulin genes during immune response // inferred from electronic annotation /// 0006119 // oxidative phosphorylation // inferred from electronic annotation /// 0006164 // purine nucleotide biosynthetic process // inferred from electronic annotation /// 0006281 // DNA rep…	0005634 // nucleus // inferred from electronic annotation /// 0032301 // MutSalpha complex // inferred from direct assay /// 0032301 // MutSalpha complex // inferred from electronic annotation /// 0032302 // MutSbeta complex // inferred from direct assay /// 0032302 // MutSbeta complex // inferred from electronic annotation	0000166 // nucleotide binding // inferred from electronic annotation /// 0000287 // magnesium ion binding // inferred from direct assay /// 0000400 // four-way junction DNA binding // inferred from direct assay /// 0003677 // DNA binding // inferred from electronic annotation /// 0003677 // DNA binding // inferred from direct assay /// 0003684 // damaged DNA binding // inferred from electronic an…	chr2:47483766-47563666 (+) // 98.57 // p21
MYC	4609	202431_s_at	0.621891	0.203735	0001783 // B cell apoptosis // inferred from electronic annotation /// 0001836 // release of cytochrome c from mitochondria // inferred from electronic annotation /// 0006006 // glucose metabolic process // inferred from electronic annotation /// 0006309 // DNA fragmentation involved in apoptosis // inferred from electronic annotation /// 0006350 // transcription // inferred from electronic annot…	0005634 // nucleus // inferred from direct assay /// 0005634 // nucleus // inferred from electronic annotation /// 0005634 // nucleus // traceable author statement /// 0005737 // cytoplasm // inferred from electronic annotation /// 0005819 // spindle // inferred from electronic annotation /// 0016604 // nuclear body // inferred from electronic annotation	0003677 // DNA binding // inferred from electronic annotation /// 0003677 // DNA binding // traceable author statement /// 0003690 // double-stranded DNA binding // inferred from electronic annotation /// 0003700 // transcription factor activity // traceable author statement /// 0003700 // transcription factor activity // inferred from electronic annotation /// 0005515 // protein binding // infer…	chr8:128817511-128822629 (+) // 98.54 // q24.21
NFKB1	4790	209239_at	1.08937	0.669282	0006350 // transcription // inferred from electronic annotation /// 0006355 // regulation of transcription, DNA-dependent // inferred from electronic annotation /// 0006366 // transcription from RNA polymerase II promoter // traceable author statement /// 0006915 // apoptosis // inferred from electronic annotation /// 0006916 // anti-apoptosis // traceable author statement /// 0006954 // inflamma…	0005634 // nucleus // inferred from direct assay /// 0005634 // nucleus // inferred from electronic annotation /// 0005634 // nucleus // traceable author statement /// 0005654 // nucleoplasm // not recorded /// 0005737 // cytoplasm // inferred from direct assay /// 0005737 // cytoplasm // inferred from electronic annotation /// 0005829 // cytosol // not recorded /// 0033256 // I-kappaB/NF-kappaB …	0003677 // DNA binding // inferred from electronic annotation /// 0003700 // transcription factor activity // traceable author statement /// 0003700 // transcription factor activity // inferred from electronic annotation /// 0005515 // protein binding // inferred from physical interaction /// 0005515 // protein binding // inferred from electronic annotation /// 0010843 // promoter binding // infe…	chr4:103641811-103756903 (+) // 95.88 // q24
NFKB2	4791	207535_s_at	0.536731	0.890685	0002268 // follicular dendritic cell differentiation // inferred from electronic annotation /// 0002467 // germinal center formation // inferred from electronic annotation /// 0006350 // transcription // inferred from electronic annotation /// 0006355 // regulation of transcription, DNA-dependent // inferred from direct assay /// 0006355 // regulation of transcription, DNA-dependent // inferred f…	0005634 // nucleus // inferred from direct assay /// 0005634 // nucleus // inferred from electronic annotation /// 0005654 // nucleoplasm // not recorded /// 0005737 // cytoplasm // inferred from direct assay /// 0005737 // cytoplasm // inferred from electronic annotation /// 0005829 // cytosol // not recorded /// 0033257 // Bcl3/NF-kappaB2 complex // inferred from direct assay	0003677 // DNA binding // inferred from electronic annotation /// 0003700 // transcription factor activity // traceable author statement /// 0003700 // transcription factor activity // inferred from electronic annotation /// 0003713 // transcription coactivator activity // traceable author statement /// 0005515 // protein binding // inferred from physical interaction /// 0005515 // protein bindin…	chr10:104145452-104148962 (+) // 81.52 // q24.32
NFKBIA	4792	201502_s_at	0.694008	1.06375	0000060 // protein import into nucleus, translocation // inferred from electronic annotation /// 0006915 // apoptosis // traceable author statement /// 0007253 // cytoplasmic sequestering of NF-kappaB // inferred from mutant phenotype /// 0010552 // positive regulation of specific transcription from RNA polymerase II promoter // inferred from mutant phenotype /// 0010745 // negative regulation of…	0005634 // nucleus // inferred from direct assay /// 0005634 // nucleus // inferred from electronic annotation /// 0005737 // cytoplasm // inferred from direct assay /// 0005737 // cytoplasm // inferred from electronic annotation /// 0005829 // cytosol // not recorded /// 0005829 // cytosol // inferred from electronic annotation /// 0033256 // I-kappaB/NF-kappaB complex // traceable author statem…	0005515 // protein binding // inferred from physical interaction /// 0008134 // transcription factor binding // traceable author statement /// 0008139 // nuclear localization sequence binding // inferred from physical interaction /// 0031625 // ubiquitin protein ligase binding // inferred from physical interaction /// 0042802 // identical protein binding // inferred from physical interaction /// …	chr14:34940466-34943886 (-) // 87.8 // q13.2
P4HB	5034	1564494_s_at	-0.517977	-0.752101	0018401 // peptidyl-proline hydroxylation to 4-hydroxy-L-proline // inferred from direct assay /// 0045454 // cell redox homeostasis // inferred from electronic annotation	0005576 // extracellular region // non-traceable author statement /// 0005783 // endoplasmic reticulum // traceable author statement /// 0005783 // endoplasmic reticulum // inferred from electronic annotation /// 0005788 // endoplasmic reticulum lumen // inferred from electronic annotation /// 0005792 // microsome // inferred from electronic annotation /// 0005793 // ER-Golgi intermediate compart…	0003756 // protein disulfide isomerase activity // traceable author statement /// 0003756 // protein disulfide isomerase activity // inferred from electronic annotation /// 0004656 // procollagen-proline 4-dioxygenase activity // inferred from direct assay /// 0004656 // procollagen-proline 4-dioxygenase activity // traceable author statement /// 0005515 // protein binding // inferred from physic…	chr17_random:2360346-2377808 (-) // 63.31 // /// chr17:77394331-77411700 (-) // 63.31 // q25.3
P4HB	5034	200654_at	-0.560871	-0.568727	0018401 // peptidyl-proline hydroxylation to 4-hydroxy-L-proline // inferred from direct assay /// 0045454 // cell redox homeostasis // inferred from electronic annotation	0005576 // extracellular region // non-traceable author statement /// 0005783 // endoplasmic reticulum // traceable author statement /// 0005783 // endoplasmic reticulum // inferred from electronic annotation /// 0005788 // endoplasmic reticulum lumen // inferred from electronic annotation /// 0005792 // microsome // inferred from electronic annotation /// 0005793 // ER-Golgi intermediate compart…	0003756 // protein disulfide isomerase activity // traceable author statement /// 0003756 // protein disulfide isomerase activity // inferred from electronic annotation /// 0004656 // procollagen-proline 4-dioxygenase activity // inferred from direct assay /// 0004656 // procollagen-proline 4-dioxygenase activity // traceable author statement /// 0005515 // protein binding // inferred from physic…	chr17_random:2360340-2377807 (-) // 96.38 // /// chr17:77394325-77411699 (-) // 96.54 // q25.3
P4HB	5034	200656_s_at	-0.981568	-1.26308	0018401 // peptidyl-proline hydroxylation to 4-hydroxy-L-proline // inferred from direct assay /// 0045454 // cell redox homeostasis // inferred from electronic annotation	0005576 // extracellular region // non-traceable author statement /// 0005783 // endoplasmic reticulum // traceable author statement /// 0005783 // endoplasmic reticulum // inferred from electronic annotation /// 0005788 // endoplasmic reticulum lumen // inferred from electronic annotation /// 0005792 // microsome // inferred from electronic annotation /// 0005793 // ER-Golgi intermediate compart…	0003756 // protein disulfide isomerase activity // traceable author statement /// 0003756 // protein disulfide isomerase activity // inferred from electronic annotation /// 0004656 // procollagen-proline 4-dioxygenase activity // inferred from direct assay /// 0004656 // procollagen-proline 4-dioxygenase activity // traceable author statement /// 0005515 // protein binding // inferred from physic…	chr17_random:2360794-2377770 (-) // 97.96 // /// chr17:77394778-77411662 (-) // 98.21 // q25.3
PAAF1	80227	218957_s_at	0.29777	0.0378499	0044419 // interspecies interaction between organisms // inferred from electronic annotation	0005829 // cytosol // inferred from electronic annotation /// 0043234 // protein complex // inferred from electronic annotation	0005515 // protein binding // inferred from physical interaction	chr11:73265680-73316427 (+) // 100.0 // q13.4
PIK3C2A	5286	1553694_a_at	-0.335029	-0.547268	0006661 // phosphatidylinositol biosynthetic process // traceable author statement /// 0007154 // cell communication // inferred from electronic annotation /// 0046854 // phosphoinositide phosphorylation // inferred from electronic annotation /// 0048015 // phosphoinositide-mediated signaling // inferred from electronic annotation	0005634 // nucleus // inferred from electronic annotation /// 0005737 // cytoplasm // inferred from electronic annotation /// 0005794 // Golgi apparatus // inferred from electronic annotation /// 0005886 // plasma membrane // inferred from electronic annotation /// 0005942 // phosphoinositide 3-kinase complex // inferred from electronic annotation /// 0016020 // membrane // inferred from electron…	0004428 // inositol or phosphatidylinositol kinase activity // inferred from electronic annotation /// 0005488 // binding // inferred from electronic annotation /// 0005515 // protein binding // inferred from electronic annotation /// 0016301 // kinase activity // inferred from electronic annotation /// 0016303 // 1-phosphatidylinositol-3-kinase activity // traceable author statement /// 0016303 …	chr11:17067772-17147864 (-) // 99.18 // p15.1
PIK3C2A	5286	1569021_at	-0.297215	-0.302996	0006661 // phosphatidylinositol biosynthetic process // traceable author statement /// 0007154 // cell communication // inferred from electronic annotation /// 0046854 // phosphoinositide phosphorylation // inferred from electronic annotation /// 0048015 // phosphoinositide-mediated signaling // inferred from electronic annotation	0005634 // nucleus // inferred from electronic annotation /// 0005737 // cytoplasm // inferred from electronic annotation /// 0005794 // Golgi apparatus // inferred from electronic annotation /// 0005886 // plasma membrane // inferred from electronic annotation /// 0005942 // phosphoinositide 3-kinase complex // inferred from electronic annotation /// 0016020 // membrane // inferred from electron…	0004428 // inositol or phosphatidylinositol kinase activity // inferred from electronic annotation /// 0005488 // binding // inferred from electronic annotation /// 0005515 // protein binding // inferred from electronic annotation /// 0016301 // kinase activity // inferred from electronic annotation /// 0016303 // 1-phosphatidylinositol-3-kinase activity // traceable author statement /// 0016303 …	chr11:17126646-17186101 (-) // 93.3 // p15.1
PIK3C2A	5286	1569022_a_at	0.761717	-0.488967	0006661 // phosphatidylinositol biosynthetic process // traceable author statement /// 0007154 // cell communication // inferred from electronic annotation /// 0046854 // phosphoinositide phosphorylation // inferred from electronic annotation /// 0048015 // phosphoinositide-mediated signaling // inferred from electronic annotation	0005634 // nucleus // inferred from electronic annotation /// 0005737 // cytoplasm // inferred from electronic annotation /// 0005794 // Golgi apparatus // inferred from electronic annotation /// 0005886 // plasma membrane // inferred from electronic annotation /// 0005942 // phosphoinositide 3-kinase complex // inferred from electronic annotation /// 0016020 // membrane // inferred from electron…	0004428 // inositol or phosphatidylinositol kinase activity // inferred from electronic annotation /// 0005488 // binding // inferred from electronic annotation /// 0005515 // protein binding // inferred from electronic annotation /// 0016301 // kinase activity // inferred from electronic annotation /// 0016303 // 1-phosphatidylinositol-3-kinase activity // traceable author statement /// 0016303 …	chr11:17126646-17186101 (-) // 93.3 // p15.1
PIK3C2A	5286	213070_at	-0.499567	-0.808491	0006661 // phosphatidylinositol biosynthetic process // traceable author statement /// 0007154 // cell communication // inferred from electronic annotation /// 0046854 // phosphoinositide phosphorylation // inferred from electronic annotation /// 0048015 // phosphoinositide-mediated signaling // inferred from electronic annotation	0005634 // nucleus // inferred from electronic annotation /// 0005737 // cytoplasm // inferred from electronic annotation /// 0005794 // Golgi apparatus // inferred from electronic annotation /// 0005886 // plasma membrane // inferred from electronic annotation /// 0005942 // phosphoinositide 3-kinase complex // inferred from electronic annotation /// 0016020 // membrane // inferred from electron…	0004428 // inositol or phosphatidylinositol kinase activity // inferred from electronic annotation /// 0005488 // binding // inferred from electronic annotation /// 0005515 // protein binding // inferred from electronic annotation /// 0016301 // kinase activity // inferred from electronic annotation /// 0016303 // 1-phosphatidylinositol-3-kinase activity // traceable author statement /// 0016303 …	chr11:17064697-17066657 (-) // 84.8 // p15.1
PIK3C2A	5286	226094_at	-0.480393	-0.95963	0006661 // phosphatidylinositol biosynthetic process // traceable author statement /// 0007154 // cell communication // inferred from electronic annotation /// 0046854 // phosphoinositide phosphorylation // inferred from electronic annotation /// 0048015 // phosphoinositide-mediated signaling // inferred from electronic annotation	0005634 // nucleus // inferred from electronic annotation /// 0005737 // cytoplasm // inferred from electronic annotation /// 0005794 // Golgi apparatus // inferred from electronic annotation /// 0005886 // plasma membrane // inferred from electronic annotation /// 0005942 // phosphoinositide 3-kinase complex // inferred from electronic annotation /// 0016020 // membrane // inferred from electron…	0004428 // inositol or phosphatidylinositol kinase activity // inferred from electronic annotation /// 0005488 // binding // inferred from electronic annotation /// 0005515 // protein binding // inferred from electronic annotation /// 0016301 // kinase activity // inferred from electronic annotation /// 0016303 // 1-phosphatidylinositol-3-kinase activity // traceable author statement /// 0016303 …	chr11:17066643-17147864 (-) // 98.96 // p15.1
PIK3C2A	5286	235792_x_at	-0.71793	-1.03199	0006661 // phosphatidylinositol biosynthetic process // traceable author statement /// 0007154 // cell communication // inferred from electronic annotation /// 0046854 // phosphoinositide phosphorylation // inferred from electronic annotation /// 0048015 // phosphoinositide-mediated signaling // inferred from electronic annotation	0005634 // nucleus // inferred from electronic annotation /// 0005737 // cytoplasm // inferred from electronic annotation /// 0005794 // Golgi apparatus // inferred from electronic annotation /// 0005886 // plasma membrane // inferred from electronic annotation /// 0005942 // phosphoinositide 3-kinase complex // inferred from electronic annotation /// 0016020 // membrane // inferred from electron…	0004428 // inositol or phosphatidylinositol kinase activity // inferred from electronic annotation /// 0005488 // binding // inferred from electronic annotation /// 0005515 // protein binding // inferred from electronic annotation /// 0016301 // kinase activity // inferred from electronic annotation /// 0016303 // 1-phosphatidylinositol-3-kinase activity // traceable author statement /// 0016303 …	chr11:17066386-17066950 (-) // 50.27 // p15.1
PIK3C2A	5286	241905_at	-0.832859	-0.660834	0006661 // phosphatidylinositol biosynthetic process // traceable author statement /// 0007154 // cell communication // inferred from electronic annotation /// 0046854 // phosphoinositide phosphorylation // inferred from electronic annotation /// 0048015 // phosphoinositide-mediated signaling // inferred from electronic annotation	0005634 // nucleus // inferred from electronic annotation /// 0005737 // cytoplasm // inferred from electronic annotation /// 0005794 // Golgi apparatus // inferred from electronic annotation /// 0005886 // plasma membrane // inferred from electronic annotation /// 0005942 // phosphoinositide 3-kinase complex // inferred from electronic annotation /// 0016020 // membrane // inferred from electron…	0004428 // inositol or phosphatidylinositol kinase activity // inferred from electronic annotation /// 0005488 // binding // inferred from electronic annotation /// 0005515 // protein binding // inferred from electronic annotation /// 0016301 // kinase activity // inferred from electronic annotation /// 0016303 // 1-phosphatidylinositol-3-kinase activity // traceable author statement /// 0016303 …	chr11:17102596-17103402 (-) // 35.86 // p15.1
PIK3C3	5289	204297_at	-0.344651	-0.303374	0006468 // protein amino acid phosphorylation // inferred from electronic annotation /// 0046854 // phosphoinositide phosphorylation // inferred from electronic annotation /// 0048015 // phosphoinositide-mediated signaling // inferred from electronic annotation	0005829 // cytosol // not recorded /// 0005942 // phosphoinositide 3-kinase complex // inferred from electronic annotation	0000166 // nucleotide binding // inferred from electronic annotation /// 0004428 // inositol or phosphatidylinositol kinase activity // inferred from electronic annotation /// 0004672 // protein kinase activity // inferred from electronic annotation /// 0005488 // binding // inferred from electronic annotation /// 0005515 // protein binding // inferred from physical interaction /// 0005524 // ATP…	chr18:37789207-37915358 (+) // 97.46 // q12.3
PIK3CA	5290	204369_at	-1.09489	-1.31023	0006006 // glucose metabolic process // inferred from electronic annotation /// 0006468 // protein amino acid phosphorylation // inferred from electronic annotation /// 0006916 // anti-apoptosis // inferred from electronic annotation /// 0007165 // signal transduction // inferred from electronic annotation /// 0040014 // regulation of multicellular organism growth // inferred from electronic anno…	0005737 // cytoplasm // inferred from direct assay /// 0005739 // mitochondrion // inferred from direct assay /// 0005829 // cytosol // not recorded /// 0005942 // phosphoinositide 3-kinase complex // inferred from electronic annotation /// 0030027 // lamellipodium // inferred from electronic annotation	0004428 // inositol or phosphatidylinositol kinase activity // inferred from electronic annotation /// 0005488 // binding // inferred from electronic annotation /// 0005515 // protein binding // inferred from physical interaction /// 0016301 // kinase activity // inferred from electronic annotation /// 0016303 // 1-phosphatidylinositol-3-kinase activity // inferred from direct assay /// 0016303 /…	chr3:180399295-180435049 (+) // 97.81 // q26.32
PIK3CA	5290	231854_at	-0.18818	-0.209891	0006006 // glucose metabolic process // inferred from electronic annotation /// 0006468 // protein amino acid phosphorylation // inferred from electronic annotation /// 0006916 // anti-apoptosis // inferred from electronic annotation /// 0007165 // signal transduction // inferred from electronic annotation /// 0040014 // regulation of multicellular organism growth // inferred from electronic anno…	0005737 // cytoplasm // inferred from direct assay /// 0005739 // mitochondrion // inferred from direct assay /// 0005829 // cytosol // not recorded /// 0005942 // phosphoinositide 3-kinase complex // inferred from electronic annotation /// 0030027 // lamellipodium // inferred from electronic annotation	0004428 // inositol or phosphatidylinositol kinase activity // inferred from electronic annotation /// 0016303 // 1-phosphatidylinositol-3-kinase activity // inferred from direct assay /// 0016740 // transferase activity // inferred from electronic annotation /// 0016773 // phosphotransferase activity, alcohol group as acceptor // inferred from electronic annotation /// 0043560 // insulin recepto…	chr22:15436252-15437390 (+) // 38.56 // q11.1 /// chr3:180436232-180438971 (+) // 97.24 // q26.32
PIK3CA	5290	235980_at	-1.93636	-1.93509	0006006 // glucose metabolic process // inferred from electronic annotation /// 0006468 // protein amino acid phosphorylation // inferred from electronic annotation /// 0006916 // anti-apoptosis // inferred from electronic annotation /// 0007165 // signal transduction // inferred from electronic annotation /// 0040014 // regulation of multicellular organism growth // inferred from electronic anno…	0005737 // cytoplasm // inferred from direct assay /// 0005739 // mitochondrion // inferred from direct assay /// 0005829 // cytosol // not recorded /// 0005942 // phosphoinositide 3-kinase complex // inferred from electronic annotation /// 0030027 // lamellipodium // inferred from electronic annotation	0004428 // inositol or phosphatidylinositol kinase activity // inferred from electronic annotation /// 0016303 // 1-phosphatidylinositol-3-kinase activity // inferred from direct assay /// 0016740 // transferase activity // inferred from electronic annotation /// 0016773 // phosphotransferase activity, alcohol group as acceptor // inferred from electronic annotation /// 0043560 // insulin recepto…	chr22:15437837-15438527 (+) // 94.4 // q11.1 /// chr3:180439418-180440110 (+) // 90.34 // q26.32
PIK3CB	5291	212688_at	-1.09623	-1.10384	0000187 // activation of MAPK activity // traceable author statement /// 0001952 // regulation of cell-matrix adhesion // inferred from electronic annotation /// 0006874 // cellular calcium ion homeostasis // inferred from electronic annotation /// 0006935 // chemotaxis // traceable author statement /// 0007156 // homophilic cell adhesion // inferred from electronic annotation /// 0007165 // sign…	0005829 // cytosol // not recorded /// 0005942 // phosphoinositide 3-kinase complex // inferred from electronic annotation	0004428 // inositol or phosphatidylinositol kinase activity // inferred from electronic annotation /// 0005488 // binding // inferred from electronic annotation /// 0016301 // kinase activity // inferred from electronic annotation /// 0016303 // 1-phosphatidylinositol-3-kinase activity // traceable author statement /// 0016303 // 1-phosphatidylinositol-3-kinase activity // inferred from electroni…	chr3:139855551-139998099 (-) // 98.52 // q22.3
PIK3CB	5291	217620_s_at	-0.600063	-0.424564	0000187 // activation of MAPK activity // traceable author statement /// 0001952 // regulation of cell-matrix adhesion // inferred from electronic annotation /// 0006874 // cellular calcium ion homeostasis // inferred from electronic annotation /// 0006935 // chemotaxis // traceable author statement /// 0007156 // homophilic cell adhesion // inferred from electronic annotation /// 0007165 // sign…	0005829 // cytosol // not recorded /// 0005942 // phosphoinositide 3-kinase complex // inferred from electronic annotation	0004428 // inositol or phosphatidylinositol kinase activity // inferred from electronic annotation /// 0005488 // binding // inferred from electronic annotation /// 0016301 // kinase activity // inferred from electronic annotation /// 0016303 // 1-phosphatidylinositol-3-kinase activity // traceable author statement /// 0016303 // 1-phosphatidylinositol-3-kinase activity // inferred from electroni…	chr3:139954412-139957513 (-) // 85.71 // q22.3
PIK3CD	5293	203879_at	0	0.26139	0006468 // protein amino acid phosphorylation // non-traceable author statement /// 0007165 // signal transduction // non-traceable author statement /// 0007165 // signal transduction // inferred from electronic annotation /// 0046854 // phosphoinositide phosphorylation // inferred from electronic annotation /// 0048015 // phosphoinositide-mediated signaling // inferred from electronic annotation	0005942 // phosphoinositide 3-kinase complex // non-traceable author statement /// 0005942 // phosphoinositide 3-kinase complex // inferred from electronic annotation	0004428 // inositol or phosphatidylinositol kinase activity // inferred from electronic annotation /// 0005488 // binding // inferred from electronic annotation /// 0005515 // protein binding // inferred from physical interaction /// 0016301 // kinase activity // inferred from electronic annotation /// 0016303 // 1-phosphatidylinositol-3-kinase activity // non-traceable author statement /// 00163…	chr1:9634389-9711561 (+) // 91.84 // p36.22
PMAIP1	5366	204285_s_at	-2.17533	-0.92121	0001836 // release of cytochrome c from mitochondria // inferred from direct assay /// 0006915 // apoptosis // inferred from electronic annotation /// 0006915 // apoptosis // inferred from mutant phenotype /// 0006917 // induction of apoptosis // inferred from direct assay /// 0006919 // activation of caspase activity // inferred from direct assay /// 0006921 // cell structure disassembly during …	0005739 // mitochondrion // inferred from direct assay /// 0005739 // mitochondrion // inferred from electronic annotation	0005515 // protein binding // inferred from physical interaction	chr18:55718171-55722517 (+) // 98.22 // q21.32
PMAIP1	5366	204286_s_at	-2.13874	-0.88684	0001836 // release of cytochrome c from mitochondria // inferred from direct assay /// 0006915 // apoptosis // inferred from electronic annotation /// 0006915 // apoptosis // inferred from mutant phenotype /// 0006917 // induction of apoptosis // inferred from direct assay /// 0006919 // activation of caspase activity // inferred from direct assay /// 0006921 // cell structure disassembly during …	0005739 // mitochondrion // inferred from direct assay /// 0005739 // mitochondrion // inferred from electronic annotation	0005515 // protein binding // inferred from physical interaction	chr18:55718216-55722517 (+) // 99.84 // q21.32
POMP	51371	217769_s_at	0.375498	0.388955	0006955 // immune response // inferred from electronic annotation	0005634 // nucleus // inferred from electronic annotation /// 0005737 // cytoplasm // inferred from electronic annotation /// 0005829 // cytosol // inferred from electronic annotation /// 0043234 // protein complex // inferred from electronic annotation		chr13:28131240-28150335 (+) // 95.11 // q12.3
POMP	51371	222402_at	0.597344	0.437305	0006955 // immune response // inferred from electronic annotation	0005634 // nucleus // inferred from electronic annotation /// 0005737 // cytoplasm // inferred from electronic annotation /// 0005829 // cytosol // inferred from electronic annotation /// 0043234 // protein complex // inferred from electronic annotation		chr13:28131277-28150996 (+) // 98.71 // q12.3
PSMA1	5682	201676_x_at	0.450691	0.29765	0006511 // ubiquitin-dependent protein catabolic process // inferred from electronic annotation /// 0031145 // anaphase-promoting complex-dependent proteasomal ubiquitin-dependent protein catabolic process // not recorded /// 0051436 // negative regulation of ubiquitin-protein ligase activity during mitotic cell cycle // not recorded /// 0051437 // positive regulation of ubiquitin-protein ligase …	0000502 // proteasome complex // traceable author statement /// 0005634 // nucleus // traceable author statement /// 0005634 // nucleus // inferred from electronic annotation /// 0005737 // cytoplasm // inferred from electronic annotation /// 0005829 // cytosol // inferred from electronic annotation /// 0005839 // proteasome core complex // inferred from electronic annotation /// 0005844 // polys…	0003723 // RNA binding // traceable author statement /// 0004175 // endopeptidase activity // inferred from electronic annotation /// 0004298 // threonine-type endopeptidase activity // inferred from electronic annotation /// 0005515 // protein binding // inferred from physical interaction /// 0005515 // protein binding // inferred from electronic annotation /// 0008233 // peptidase activity // i…	chr11:14482998-14498524 (-) // 97.03 // p15.2
PSMA1	5682	210759_s_at	0.678155	0.527364	0006511 // ubiquitin-dependent protein catabolic process // inferred from electronic annotation /// 0031145 // anaphase-promoting complex-dependent proteasomal ubiquitin-dependent protein catabolic process // not recorded /// 0051436 // negative regulation of ubiquitin-protein ligase activity during mitotic cell cycle // not recorded /// 0051437 // positive regulation of ubiquitin-protein ligase …	0000502 // proteasome complex // traceable author statement /// 0005634 // nucleus // traceable author statement /// 0005634 // nucleus // inferred from electronic annotation /// 0005737 // cytoplasm // inferred from electronic annotation /// 0005829 // cytosol // inferred from electronic annotation /// 0005839 // proteasome core complex // inferred from electronic annotation /// 0005844 // polys…	0003723 // RNA binding // traceable author statement /// 0004175 // endopeptidase activity // inferred from electronic annotation /// 0004298 // threonine-type endopeptidase activity // inferred from electronic annotation /// 0005515 // protein binding // inferred from physical interaction /// 0005515 // protein binding // inferred from electronic annotation /// 0008233 // peptidase activity // i…	chr11:14483185-14621739 (-) // 99.68 // p15.2
PSMA1	5682	211746_x_at	0.485171	0.353919	0006511 // ubiquitin-dependent protein catabolic process // inferred from electronic annotation /// 0031145 // anaphase-promoting complex-dependent proteasomal ubiquitin-dependent protein catabolic process // not recorded /// 0051436 // negative regulation of ubiquitin-protein ligase activity during mitotic cell cycle // not recorded /// 0051437 // positive regulation of ubiquitin-protein ligase …	0000502 // proteasome complex // traceable author statement /// 0005634 // nucleus // traceable author statement /// 0005634 // nucleus // inferred from electronic annotation /// 0005737 // cytoplasm // inferred from electronic annotation /// 0005829 // cytosol // inferred from electronic annotation /// 0005839 // proteasome core complex // inferred from electronic annotation /// 0005844 // polys…	0003723 // RNA binding // traceable author statement /// 0004175 // endopeptidase activity // inferred from electronic annotation /// 0004298 // threonine-type endopeptidase activity // inferred from electronic annotation /// 0005515 // protein binding // inferred from physical interaction /// 0005515 // protein binding // inferred from electronic annotation /// 0008233 // peptidase activity // i…	chr11:14483000-14498502 (-) // 97.53 // p15.2
PSMA2	5683	201316_at	1.00196	1.10635	0006511 // ubiquitin-dependent protein catabolic process // inferred from electronic annotation /// 0031145 // anaphase-promoting complex-dependent proteasomal ubiquitin-dependent protein catabolic process // not recorded /// 0051436 // negative regulation of ubiquitin-protein ligase activity during mitotic cell cycle // not recorded /// 0051437 // positive regulation of ubiquitin-protein ligase …	0000502 // proteasome complex // traceable author statement /// 0005634 // nucleus // inferred from electronic annotation /// 0005737 // cytoplasm // inferred from electronic annotation /// 0005829 // cytosol // inferred from electronic annotation /// 0005839 // proteasome core complex // inferred from electronic annotation /// 0043234 // protein complex // inferred from electronic annotation	0004175 // endopeptidase activity // inferred from electronic annotation /// 0004298 // threonine-type endopeptidase activity // inferred from electronic annotation /// 0005515 // protein binding // inferred from physical interaction /// 0008233 // peptidase activity // inferred from electronic annotation /// 0016787 // hydrolase activity // inferred from electronic annotation	chr7:42922988-42938326 (-) // 97.9 // p14.1
PSMA2	5683	201317_s_at	0.951837	0.927514	0006511 // ubiquitin-dependent protein catabolic process // inferred from electronic annotation /// 0031145 // anaphase-promoting complex-dependent proteasomal ubiquitin-dependent protein catabolic process // not recorded /// 0051436 // negative regulation of ubiquitin-protein ligase activity during mitotic cell cycle // not recorded /// 0051437 // positive regulation of ubiquitin-protein ligase …	0000502 // proteasome complex // traceable author statement /// 0005634 // nucleus // inferred from electronic annotation /// 0005737 // cytoplasm // inferred from electronic annotation /// 0005829 // cytosol // inferred from electronic annotation /// 0005839 // proteasome core complex // inferred from electronic annotation /// 0043234 // protein complex // inferred from electronic annotation	0004175 // endopeptidase activity // inferred from electronic annotation /// 0004298 // threonine-type endopeptidase activity // inferred from electronic annotation /// 0005515 // protein binding // inferred from physical interaction /// 0008233 // peptidase activity // inferred from electronic annotation /// 0016787 // hydrolase activity // inferred from electronic annotation	chr2:202752262-202753435 (+) // 94.11 // q33.1 /// chr7:42923536-42938282 (-) // 100.0 // p14.1
PSMA3	5684	201532_at	1.5498	1.52374	0006511 // ubiquitin-dependent protein catabolic process // inferred from electronic annotation /// 0031145 // anaphase-promoting complex-dependent proteasomal ubiquitin-dependent protein catabolic process // not recorded /// 0051436 // negative regulation of ubiquitin-protein ligase activity during mitotic cell cycle // not recorded /// 0051437 // positive regulation of ubiquitin-protein ligase …	0000502 // proteasome complex // traceable author statement /// 0005634 // nucleus // traceable author statement /// 0005634 // nucleus // inferred from electronic annotation /// 0005737 // cytoplasm // traceable author statement /// 0005737 // cytoplasm // inferred from electronic annotation /// 0005829 // cytosol // inferred from electronic annotation /// 0005839 // proteasome core complex // i…	0004175 // endopeptidase activity // inferred from electronic annotation /// 0004298 // threonine-type endopeptidase activity // inferred from electronic annotation /// 0005515 // protein binding // inferred from physical interaction /// 0005515 // protein binding // inferred from electronic annotation /// 0008233 // peptidase activity // inferred from electronic annotation /// 0016787 // hydrola…	chr14:57784219-57808431 (+) // 97.02 // q23.1
PSMA4	5685	203396_at	0.57783	0.483216	0006511 // ubiquitin-dependent protein catabolic process // inferred from electronic annotation /// 0031145 // anaphase-promoting complex-dependent proteasomal ubiquitin-dependent protein catabolic process // not recorded /// 0051436 // negative regulation of ubiquitin-protein ligase activity during mitotic cell cycle // not recorded /// 0051437 // positive regulation of ubiquitin-protein ligase …	0000502 // proteasome complex // traceable author statement /// 0005634 // nucleus // inferred from electronic annotation /// 0005737 // cytoplasm // inferred from electronic annotation /// 0005829 // cytosol // inferred from electronic annotation /// 0005839 // proteasome core complex // inferred from electronic annotation /// 0043234 // protein complex // inferred from electronic annotation	0004175 // endopeptidase activity // inferred from electronic annotation /// 0004298 // threonine-type endopeptidase activity // inferred from electronic annotation /// 0005515 // protein binding // inferred from physical interaction /// 0008233 // peptidase activity // inferred from electronic annotation /// 0016787 // hydrolase activity // inferred from electronic annotation /// 0042802 // iden…	chr15:76619900-76628570 (+) // 99.54 // q25.1
PSMA5	5686	201274_at	1.00601	0.930315	0006511 // ubiquitin-dependent protein catabolic process // inferred from electronic annotation /// 0031145 // anaphase-promoting complex-dependent proteasomal ubiquitin-dependent protein catabolic process // not recorded /// 0051436 // negative regulation of ubiquitin-protein ligase activity during mitotic cell cycle // not recorded /// 0051437 // positive regulation of ubiquitin-protein ligase …	0000502 // proteasome complex // traceable author statement /// 0005634 // nucleus // inferred from electronic annotation /// 0005737 // cytoplasm // inferred from electronic annotation /// 0005829 // cytosol // inferred from electronic annotation /// 0005839 // proteasome core complex // inferred from electronic annotation /// 0043234 // protein complex // inferred from electronic annotation	0004175 // endopeptidase activity // inferred from electronic annotation /// 0004298 // threonine-type endopeptidase activity // inferred from electronic annotation /// 0005515 // protein binding // inferred from physical interaction /// 0008233 // peptidase activity // inferred from electronic annotation /// 0016787 // hydrolase activity // inferred from electronic annotation	chr1:109745995-109770496 (-) // 94.58 // p13.3
PSMA7	5688	201114_x_at	0.451555	0.385223	0006511 // ubiquitin-dependent protein catabolic process // inferred from electronic annotation /// 0031145 // anaphase-promoting complex-dependent proteasomal ubiquitin-dependent protein catabolic process // not recorded /// 0051436 // negative regulation of ubiquitin-protein ligase activity during mitotic cell cycle // not recorded /// 0051437 // positive regulation of ubiquitin-protein ligase …	0000502 // proteasome complex // traceable author statement /// 0005634 // nucleus // inferred from electronic annotation /// 0005737 // cytoplasm // inferred from electronic annotation /// 0005829 // cytosol // inferred from electronic annotation /// 0005839 // proteasome core complex // inferred from electronic annotation /// 0043234 // protein complex // inferred from electronic annotation	0004175 // endopeptidase activity // inferred from electronic annotation /// 0004298 // threonine-type endopeptidase activity // inferred from electronic annotation /// 0005515 // protein binding // inferred from physical interaction /// 0008233 // peptidase activity // inferred from electronic annotation /// 0016787 // hydrolase activity // inferred from electronic annotation /// 0042802 // iden…	chr20:60145185-60151767 (-) // 92.5 // q13.33
PSMA7	5688	216088_s_at	0.785699	0.60668	0006511 // ubiquitin-dependent protein catabolic process // inferred from electronic annotation /// 0031145 // anaphase-promoting complex-dependent proteasomal ubiquitin-dependent protein catabolic process // not recorded /// 0051436 // negative regulation of ubiquitin-protein ligase activity during mitotic cell cycle // not recorded /// 0051437 // positive regulation of ubiquitin-protein ligase …	0000502 // proteasome complex // traceable author statement /// 0005634 // nucleus // inferred from electronic annotation /// 0005737 // cytoplasm // inferred from electronic annotation /// 0005829 // cytosol // inferred from electronic annotation /// 0005839 // proteasome core complex // inferred from electronic annotation /// 0043234 // protein complex // inferred from electronic annotation	0004175 // endopeptidase activity // inferred from electronic annotation /// 0004298 // threonine-type endopeptidase activity // inferred from electronic annotation /// 0005515 // protein binding // inferred from physical interaction /// 0008233 // peptidase activity // inferred from electronic annotation /// 0016787 // hydrolase activity // inferred from electronic annotation /// 0042802 // iden…	chr20:60145307-60151047 (-) // 94.7 // q13.33
PSMB1	5689	200876_s_at	0.127009	0.422687	0006511 // ubiquitin-dependent protein catabolic process // inferred from electronic annotation /// 0031145 // anaphase-promoting complex-dependent proteasomal ubiquitin-dependent protein catabolic process // not recorded /// 0051436 // negative regulation of ubiquitin-protein ligase activity during mitotic cell cycle // not recorded /// 0051437 // positive regulation of ubiquitin-protein ligase …	0000502 // proteasome complex // traceable author statement /// 0005634 // nucleus // inferred from electronic annotation /// 0005737 // cytoplasm // inferred from electronic annotation /// 0005829 // cytosol // inferred from electronic annotation /// 0005839 // proteasome core complex // inferred from electronic annotation /// 0043234 // protein complex // inferred from electronic annotation	0004175 // endopeptidase activity // inferred from electronic annotation /// 0004298 // threonine-type endopeptidase activity // inferred from electronic annotation /// 0005515 // protein binding // inferred from physical interaction /// 0008233 // peptidase activity // inferred from electronic annotation /// 0016787 // hydrolase activity // inferred from electronic annotation	chr6:170686151-170704267 (-) // 99.51 // q27
PSMB1	5689	214288_s_at	-0.000472977	0.32033	0006511 // ubiquitin-dependent protein catabolic process // inferred from electronic annotation /// 0031145 // anaphase-promoting complex-dependent proteasomal ubiquitin-dependent protein catabolic process // not recorded /// 0051436 // negative regulation of ubiquitin-protein ligase activity during mitotic cell cycle // not recorded /// 0051437 // positive regulation of ubiquitin-protein ligase …	0000502 // proteasome complex // traceable author statement /// 0005634 // nucleus // inferred from electronic annotation /// 0005737 // cytoplasm // inferred from electronic annotation /// 0005829 // cytosol // inferred from electronic annotation /// 0005839 // proteasome core complex // inferred from electronic annotation /// 0043234 // protein complex // inferred from electronic annotation	0004175 // endopeptidase activity // inferred from electronic annotation /// 0004298 // threonine-type endopeptidase activity // inferred from electronic annotation /// 0005515 // protein binding // inferred from physical interaction /// 0008233 // peptidase activity // inferred from electronic annotation /// 0016787 // hydrolase activity // inferred from electronic annotation	chr6:170686129-170686550 (-) // 100.0 // q27
PSMB1	5689	214289_at	-0.0287845	0.16865	0006511 // ubiquitin-dependent protein catabolic process // inferred from electronic annotation /// 0031145 // anaphase-promoting complex-dependent proteasomal ubiquitin-dependent protein catabolic process // not recorded /// 0051436 // negative regulation of ubiquitin-protein ligase activity during mitotic cell cycle // not recorded /// 0051437 // positive regulation of ubiquitin-protein ligase …	0000502 // proteasome complex // traceable author statement /// 0005634 // nucleus // inferred from electronic annotation /// 0005737 // cytoplasm // inferred from electronic annotation /// 0005829 // cytosol // inferred from electronic annotation /// 0005839 // proteasome core complex // inferred from electronic annotation /// 0043234 // protein complex // inferred from electronic annotation	0004175 // endopeptidase activity // inferred from electronic annotation /// 0004298 // threonine-type endopeptidase activity // inferred from electronic annotation /// 0005515 // protein binding // inferred from physical interaction /// 0008233 // peptidase activity // inferred from electronic annotation /// 0016787 // hydrolase activity // inferred from electronic annotation	chr6:170686129-170686550 (-) // 100.0 // q27
PSMB10	5699	202659_at	0.64876	1.3536	0006508 // proteolysis // inferred from electronic annotation /// 0006511 // ubiquitin-dependent protein catabolic process // inferred from electronic annotation /// 0006959 // humoral immune response // traceable author statement /// 0031145 // anaphase-promoting complex-dependent proteasomal ubiquitin-dependent protein catabolic process // not recorded /// 0051436 // negative regulation of ubiq…	0000502 // proteasome complex // traceable author statement /// 0005634 // nucleus // inferred from electronic annotation /// 0005737 // cytoplasm // inferred from electronic annotation /// 0005829 // cytosol // inferred from electronic annotation /// 0005839 // proteasome core complex // inferred from electronic annotation /// 0043234 // protein complex // inferred from electronic annotation	0003824 // catalytic activity // inferred from electronic annotation /// 0004175 // endopeptidase activity // inferred from electronic annotation /// 0004252 // serine-type endopeptidase activity // inferred from electronic annotation /// 0004298 // threonine-type endopeptidase activity // inferred from electronic annotation /// 0008233 // peptidase activity // inferred from electronic annotation…	chr16:66525909-66528241 (-) // 96.59 // q22.1
PSMB2	5690	200039_s_at	1.45728	1.38384	0006511 // ubiquitin-dependent protein catabolic process // inferred from electronic annotation /// 0031145 // anaphase-promoting complex-dependent proteasomal ubiquitin-dependent protein catabolic process // not recorded /// 0051436 // negative regulation of ubiquitin-protein ligase activity during mitotic cell cycle // not recorded /// 0051437 // positive regulation of ubiquitin-protein ligase …	0000502 // proteasome complex // traceable author statement /// 0005634 // nucleus // inferred from electronic annotation /// 0005737 // cytoplasm // inferred from electronic annotation /// 0005829 // cytosol // inferred from electronic annotation /// 0005839 // proteasome core complex // inferred from electronic annotation /// 0043234 // protein complex // inferred from electronic annotation	0004175 // endopeptidase activity // inferred from electronic annotation /// 0004298 // threonine-type endopeptidase activity // inferred from electronic annotation /// 0008233 // peptidase activity // inferred from electronic annotation /// 0016787 // hydrolase activity // inferred from electronic annotation	chr1:35841327-35879650 (-) // 100.0 // p34.3
PSMB2	5690	201404_x_at	0.373901	0.316879	0006511 // ubiquitin-dependent protein catabolic process // inferred from electronic annotation /// 0031145 // anaphase-promoting complex-dependent proteasomal ubiquitin-dependent protein catabolic process // not recorded /// 0051436 // negative regulation of ubiquitin-protein ligase activity during mitotic cell cycle // not recorded /// 0051437 // positive regulation of ubiquitin-protein ligase …	0000502 // proteasome complex // traceable author statement /// 0005634 // nucleus // inferred from electronic annotation /// 0005737 // cytoplasm // inferred from electronic annotation /// 0005829 // cytosol // inferred from electronic annotation /// 0005839 // proteasome core complex // inferred from electronic annotation /// 0043234 // protein complex // inferred from electronic annotation	0004175 // endopeptidase activity // inferred from electronic annotation /// 0004298 // threonine-type endopeptidase activity // inferred from electronic annotation /// 0008233 // peptidase activity // inferred from electronic annotation /// 0016787 // hydrolase activity // inferred from electronic annotation	chr1:35840326-35879678 (-) // 61.59 // p34.3
PSMB3	5691	201400_at	1.00466	0.979449	0006511 // ubiquitin-dependent protein catabolic process // inferred from electronic annotation /// 0031145 // anaphase-promoting complex-dependent proteasomal ubiquitin-dependent protein catabolic process // not recorded /// 0051436 // negative regulation of ubiquitin-protein ligase activity during mitotic cell cycle // not recorded /// 0051437 // positive regulation of ubiquitin-protein ligase …	0000502 // proteasome complex // traceable author statement /// 0005634 // nucleus // inferred from electronic annotation /// 0005737 // cytoplasm // inferred from electronic annotation /// 0005829 // cytosol // inferred from electronic annotation /// 0005839 // proteasome core complex // inferred from electronic annotation /// 0043234 // protein complex // inferred from electronic annotation	0004175 // endopeptidase activity // inferred from electronic annotation /// 0004298 // threonine-type endopeptidase activity // inferred from electronic annotation /// 0005515 // protein binding // inferred from physical interaction /// 0008233 // peptidase activity // inferred from electronic annotation /// 0016787 // hydrolase activity // inferred from electronic annotation	chr17:34162588-34174003 (+) // 99.86 // q12
PSMB4	5692	202243_s_at	1.36921	1.38966	0006511 // ubiquitin-dependent protein catabolic process // inferred from electronic annotation /// 0031145 // anaphase-promoting complex-dependent proteasomal ubiquitin-dependent protein catabolic process // not recorded /// 0051436 // negative regulation of ubiquitin-protein ligase activity during mitotic cell cycle // not recorded /// 0051437 // positive regulation of ubiquitin-protein ligase …	0000502 // proteasome complex // traceable author statement /// 0005634 // nucleus // traceable author statement /// 0005634 // nucleus // inferred from electronic annotation /// 0005737 // cytoplasm // inferred from electronic annotation /// 0005737 // cytoplasm // inferred from direct assay /// 0005813 // centrosome // inferred from direct assay /// 0005829 // cytosol // inferred from electroni…	0004175 // endopeptidase activity // inferred from electronic annotation /// 0004298 // threonine-type endopeptidase activity // inferred from electronic annotation /// 0008233 // peptidase activity // inferred from electronic annotation /// 0016787 // hydrolase activity // inferred from electronic annotation	chr1:149638664-149641036 (+) // 99.89 // q21.3
PSMB4	5692	202244_at	1.08955	1.09202	0006511 // ubiquitin-dependent protein catabolic process // inferred from electronic annotation /// 0031145 // anaphase-promoting complex-dependent proteasomal ubiquitin-dependent protein catabolic process // not recorded /// 0051436 // negative regulation of ubiquitin-protein ligase activity during mitotic cell cycle // not recorded /// 0051437 // positive regulation of ubiquitin-protein ligase …	0000502 // proteasome complex // traceable author statement /// 0005634 // nucleus // traceable author statement /// 0005634 // nucleus // inferred from electronic annotation /// 0005737 // cytoplasm // inferred from electronic annotation /// 0005737 // cytoplasm // inferred from direct assay /// 0005813 // centrosome // inferred from direct assay /// 0005829 // cytosol // inferred from electroni…	0004175 // endopeptidase activity // inferred from electronic annotation /// 0004298 // threonine-type endopeptidase activity // inferred from electronic annotation /// 0008233 // peptidase activity // inferred from electronic annotation /// 0016787 // hydrolase activity // inferred from electronic annotation	chr1:149638664-149641036 (+) // 99.89 // q21.3
PSMB4	5692	228204_at	1.68413	1.08182	0006511 // ubiquitin-dependent protein catabolic process // inferred from electronic annotation /// 0031145 // anaphase-promoting complex-dependent proteasomal ubiquitin-dependent protein catabolic process // not recorded /// 0051436 // negative regulation of ubiquitin-protein ligase activity during mitotic cell cycle // not recorded /// 0051437 // positive regulation of ubiquitin-protein ligase …	0000502 // proteasome complex // traceable author statement /// 0005634 // nucleus // traceable author statement /// 0005634 // nucleus // inferred from electronic annotation /// 0005737 // cytoplasm // inferred from electronic annotation /// 0005737 // cytoplasm // inferred from direct assay /// 0005813 // centrosome // inferred from direct assay /// 0005829 // cytosol // inferred from electroni…	0004175 // endopeptidase activity // inferred from electronic annotation /// 0004298 // threonine-type endopeptidase activity // inferred from electronic annotation /// 0008233 // peptidase activity // inferred from electronic annotation /// 0016787 // hydrolase activity // inferred from electronic annotation	chr1:149638664-149640392 (-) // 90.74 // q21.3
PSMB5	5693	208799_at	1.68781	1.69376	0006511 // ubiquitin-dependent protein catabolic process // inferred from electronic annotation /// 0031145 // anaphase-promoting complex-dependent proteasomal ubiquitin-dependent protein catabolic process // not recorded /// 0051436 // negative regulation of ubiquitin-protein ligase activity during mitotic cell cycle // not recorded /// 0051437 // positive regulation of ubiquitin-protein ligase …	0000502 // proteasome complex // traceable author statement /// 0005634 // nucleus // inferred from electronic annotation /// 0005737 // cytoplasm // inferred from electronic annotation /// 0005829 // cytosol // inferred from electronic annotation /// 0005839 // proteasome core complex // inferred from electronic annotation /// 0043234 // protein complex // inferred from electronic annotation	0004175 // endopeptidase activity // inferred from electronic annotation /// 0004298 // threonine-type endopeptidase activity // inferred from electronic annotation /// 0005515 // protein binding // inferred from physical interaction /// 0008233 // peptidase activity // inferred from electronic annotation /// 0016787 // hydrolase activity // inferred from electronic annotation	chr14:22564906-22573917 (-) // 96.74 // q11.2
PSMB6	5694	208827_at	1.18547	1.22539	0006511 // ubiquitin-dependent protein catabolic process // non-traceable author statement /// 0006511 // ubiquitin-dependent protein catabolic process // inferred from electronic annotation /// 0031145 // anaphase-promoting complex-dependent proteasomal ubiquitin-dependent protein catabolic process // not recorded /// 0051436 // negative regulation of ubiquitin-protein ligase activity during mit…	0005634 // nucleus // inferred from electronic annotation /// 0005737 // cytoplasm // inferred from electronic annotation /// 0005829 // cytosol // inferred from electronic annotation /// 0005839 // proteasome core complex // non-traceable author statement /// 0005839 // proteasome core complex // inferred from electronic annotation /// 0043234 // protein complex // inferred from electronic annot…	0004175 // endopeptidase activity // inferred from electronic annotation /// 0004175 // endopeptidase activity // non-traceable author statement /// 0004298 // threonine-type endopeptidase activity // inferred from electronic annotation /// 0008233 // peptidase activity // inferred from electronic annotation /// 0016787 // hydrolase activity // inferred from electronic annotation	chr17:4646428-4648746 (+) // 95.74 // p13.2
PSMB7	5695	200786_at	0.689248	0.811923	0006511 // ubiquitin-dependent protein catabolic process // inferred from electronic annotation /// 0031145 // anaphase-promoting complex-dependent proteasomal ubiquitin-dependent protein catabolic process // not recorded /// 0051436 // negative regulation of ubiquitin-protein ligase activity during mitotic cell cycle // not recorded /// 0051437 // positive regulation of ubiquitin-protein ligase …	0000502 // proteasome complex // traceable author statement /// 0005634 // nucleus // inferred from electronic annotation /// 0005737 // cytoplasm // inferred from electronic annotation /// 0005829 // cytosol // inferred from electronic annotation /// 0005839 // proteasome core complex // inferred from electronic annotation /// 0043234 // protein complex // inferred from electronic annotation	0004175 // endopeptidase activity // inferred from electronic annotation /// 0004298 // threonine-type endopeptidase activity // inferred from electronic annotation /// 0008233 // peptidase activity // inferred from electronic annotation /// 0016301 // kinase activity // inferred from electronic annotation /// 0016787 // hydrolase activity // inferred from electronic annotation	chr9:126155565-126217539 (-) // 100.0 // q33.3
PSMB7	5695	244801_at	-1.20185	-0.0340514	0006511 // ubiquitin-dependent protein catabolic process // inferred from electronic annotation /// 0031145 // anaphase-promoting complex-dependent proteasomal ubiquitin-dependent protein catabolic process // not recorded /// 0051436 // negative regulation of ubiquitin-protein ligase activity during mitotic cell cycle // not recorded /// 0051437 // positive regulation of ubiquitin-protein ligase …	0000502 // proteasome complex // traceable author statement /// 0005634 // nucleus // inferred from electronic annotation /// 0005737 // cytoplasm // inferred from electronic annotation /// 0005829 // cytosol // inferred from electronic annotation /// 0005839 // proteasome core complex // inferred from electronic annotation /// 0043234 // protein complex // inferred from electronic annotation	0004175 // endopeptidase activity // inferred from electronic annotation /// 0004298 // threonine-type endopeptidase activity // inferred from electronic annotation /// 0008233 // peptidase activity // inferred from electronic annotation /// 0016301 // kinase activity // inferred from electronic annotation /// 0016787 // hydrolase activity // inferred from electronic annotation	chr9:126185233-126185651 (-) // 99.76 // q33.3
PSMB8	5696	209040_s_at	-0.528066	1.09673	0006511 // ubiquitin-dependent protein catabolic process // inferred from electronic annotation /// 0006955 // immune response // inferred from electronic annotation /// 0019882 // antigen processing and presentation // inferred from electronic annotation /// 0031145 // anaphase-promoting complex-dependent proteasomal ubiquitin-dependent protein catabolic process // not recorded /// 0051436 // ne…	0000502 // proteasome complex // traceable author statement /// 0005634 // nucleus // inferred from electronic annotation /// 0005737 // cytoplasm // inferred from electronic annotation /// 0005829 // cytosol // inferred from electronic annotation /// 0005839 // proteasome core complex // inferred from electronic annotation /// 0042825 // TAP complex // inferred from electronic annotation /// 004…	0000166 // nucleotide binding // inferred from electronic annotation /// 0004175 // endopeptidase activity // inferred from electronic annotation /// 0004298 // threonine-type endopeptidase activity // inferred from electronic annotation /// 0005515 // protein binding // inferred from physical interaction /// 0005524 // ATP binding // inferred from electronic annotation /// 0008233 // peptidase a…	chr6:32916602-32919779 (-) // 98.97 // p21.32 /// chr6_cox_hap1:4189479-4192656 (-) // 98.97 // /// chr6_qbl_hap2:3994678-3997855 (-) // 98.97 //
PSMB9	5698	204279_at	-0.200177	2.09686	0005975 // carbohydrate metabolic process // inferred from electronic annotation /// 0005977 // glycogen metabolic process // inferred from electronic annotation /// 0006511 // ubiquitin-dependent protein catabolic process // inferred from electronic annotation /// 0006955 // immune response // inferred from electronic annotation /// 0009966 // regulation of signal transduction // inferred from e…	0000502 // proteasome complex // traceable author statement /// 0005634 // nucleus // inferred from electronic annotation /// 0005737 // cytoplasm // inferred from electronic annotation /// 0005829 // cytosol // inferred from electronic annotation /// 0005839 // proteasome core complex // inferred from electronic annotation /// 0042825 // TAP complex // inferred from electronic annotation /// 004…	0000166 // nucleotide binding // inferred from electronic annotation /// 0004175 // endopeptidase activity // inferred from electronic annotation /// 0004298 // threonine-type endopeptidase activity // inferred from electronic annotation /// 0004864 // phosphoprotein phosphatase inhibitor activity // inferred from electronic annotation /// 0005524 // ATP binding // inferred from electronic annota…	chr6:32929939-32935305 (+) // 99.86 // p21.32 /// chr6_cox_hap1:4202816-4208182 (+) // 99.86 // /// chr6_qbl_hap2:4008015-4013382 (+) // 99.86 //
PSMC1	5700	204219_s_at	1.44786	1.3524	0030163 // protein catabolic process // inferred from electronic annotation /// 0031145 // anaphase-promoting complex-dependent proteasomal ubiquitin-dependent protein catabolic process // not recorded /// 0051436 // negative regulation of ubiquitin-protein ligase activity during mitotic cell cycle // not recorded /// 0051437 // positive regulation of ubiquitin-protein ligase activity during mito…	0000502 // proteasome complex // non-traceable author statement /// 0005634 // nucleus // inferred from electronic annotation /// 0005634 // nucleus // inferred from direct assay /// 0005730 // nucleolus // inferred from direct assay /// 0005737 // cytoplasm // inferred from electronic annotation /// 0005737 // cytoplasm // inferred from direct assay /// 0005829 // cytosol // inferred from electr…	0000166 // nucleotide binding // inferred from electronic annotation /// 0005515 // protein binding // inferred from physical interaction /// 0005524 // ATP binding // inferred from electronic annotation /// 0008233 // peptidase activity // inferred from electronic annotation /// 0016787 // hydrolase activity // inferred from electronic annotation /// 0016887 // ATPase activity // traceable autho…	chr12:18736951-18738519 (+) // 93.87 // p12.3 /// chr14:89792646-89808719 (+) // 99.06 // q32.11 /// chr2:17429819-17431381 (+) // 90.99 // p24.2 /// chr3:68767525-68769083 (+) // 97.0 // p14.1 /// chr6:4647674-4649229 (+) // 91.49 // p25.1 /// chr7:136049112-136050694 (+) // 91.87 // q33 /// chr5:55606659-55608257 (-) // 92.25 // q11.2
PSMC2	5701	201067_at	-0.214899	-0.0850372	0006511 // ubiquitin-dependent protein catabolic process // inferred from direct assay /// 0030163 // protein catabolic process // inferred from electronic annotation /// 0031145 // anaphase-promoting complex-dependent proteasomal ubiquitin-dependent protein catabolic process // not recorded /// 0044419 // interspecies interaction between organisms // inferred from electronic annotation /// 00514…	0000502 // proteasome complex // inferred from direct assay /// 0005634 // nucleus // inferred from electronic annotation /// 0005737 // cytoplasm // traceable author statement /// 0005737 // cytoplasm // inferred from electronic annotation /// 0005829 // cytosol // inferred from electronic annotation /// 0043234 // protein complex // inferred from electronic annotation	0000166 // nucleotide binding // inferred from electronic annotation /// 0005515 // protein binding // inferred from physical interaction /// 0005515 // protein binding // inferred from electronic annotation /// 0005524 // ATP binding // inferred from electronic annotation /// 0008233 // peptidase activity // inferred from electronic annotation /// 0016787 // hydrolase activity // inferred from e…	chr7:102775307-102796642 (+) // 93.34 // q22.1
PSMC2	5701	201068_s_at	0.85203	0.749369	0006511 // ubiquitin-dependent protein catabolic process // inferred from direct assay /// 0030163 // protein catabolic process // inferred from electronic annotation /// 0031145 // anaphase-promoting complex-dependent proteasomal ubiquitin-dependent protein catabolic process // not recorded /// 0044419 // interspecies interaction between organisms // inferred from electronic annotation /// 00514…	0000502 // proteasome complex // inferred from direct assay /// 0005634 // nucleus // inferred from electronic annotation /// 0005737 // cytoplasm // traceable author statement /// 0005737 // cytoplasm // inferred from electronic annotation /// 0005829 // cytosol // inferred from electronic annotation /// 0043234 // protein complex // inferred from electronic annotation	0000166 // nucleotide binding // inferred from electronic annotation /// 0005515 // protein binding // inferred from physical interaction /// 0005515 // protein binding // inferred from electronic annotation /// 0005524 // ATP binding // inferred from electronic annotation /// 0008233 // peptidase activity // inferred from electronic annotation /// 0016787 // hydrolase activity // inferred from e…	chr3:133376885-133378340 (+) // 91.2 // q22.1 /// chr7:102775344-102795831 (+) // 97.77 // q22.1
PSMC2	5701	238020_at	-0.122891	-0.00998837	0006511 // ubiquitin-dependent protein catabolic process // inferred from direct assay /// 0030163 // protein catabolic process // inferred from electronic annotation /// 0031145 // anaphase-promoting complex-dependent proteasomal ubiquitin-dependent protein catabolic process // not recorded /// 0044419 // interspecies interaction between organisms // inferred from electronic annotation /// 00514…	0000502 // proteasome complex // inferred from direct assay /// 0005634 // nucleus // inferred from electronic annotation /// 0005737 // cytoplasm // traceable author statement /// 0005737 // cytoplasm // inferred from electronic annotation /// 0005829 // cytosol // inferred from electronic annotation /// 0043234 // protein complex // inferred from electronic annotation	0000166 // nucleotide binding // inferred from electronic annotation /// 0005515 // protein binding // inferred from physical interaction /// 0005515 // protein binding // inferred from electronic annotation /// 0005524 // ATP binding // inferred from electronic annotation /// 0008233 // peptidase activity // inferred from electronic annotation /// 0016787 // hydrolase activity // inferred from e…	chr7:102796570-102797078 (+) // 95.31 // q22.1
PSMC3	5702	201267_s_at	0.85466	0.700027	0001824 // blastocyst development // inferred from electronic annotation /// 0030163 // protein catabolic process // inferred from electronic annotation /// 0031145 // anaphase-promoting complex-dependent proteasomal ubiquitin-dependent protein catabolic process // not recorded /// 0044419 // interspecies interaction between organisms // inferred from electronic annotation /// 0051436 // negative…	0000502 // proteasome complex // traceable author statement /// 0005634 // nucleus // traceable author statement /// 0005634 // nucleus // inferred from electronic annotation /// 0005634 // nucleus // inferred from direct assay /// 0005737 // cytoplasm // inferred from electronic annotation /// 0005737 // cytoplasm // inferred from direct assay /// 0005829 // cytosol // inferred from electronic a…	0000166 // nucleotide binding // inferred from electronic annotation /// 0003713 // transcription coactivator activity // traceable author statement /// 0003714 // transcription corepressor activity // traceable author statement /// 0005515 // protein binding // inferred from physical interaction /// 0005524 // ATP binding // inferred from electronic annotation /// 0016787 // hydrolase activity /…	chr11:47396901-47404584 (-) // 94.66 // p11.2
PSMC3IP	29893	205956_x_at	1.54605	1.45138	0006310 // DNA recombination // inferred from electronic annotation /// 0007126 // meiosis // inferred from electronic annotation	0005634 // nucleus // inferred from electronic annotation	0003677 // DNA binding // inferred from electronic annotation /// 0005515 // protein binding // non-traceable author statement	chr17:37977860-37983274 (-) // 89.9 // q21.31
PSMC3IP	29893	213951_s_at	1.3901	1.47729	0006310 // DNA recombination // inferred from electronic annotation /// 0007126 // meiosis // inferred from electronic annotation	0005634 // nucleus // inferred from electronic annotation	0003677 // DNA binding // inferred from electronic annotation /// 0005515 // protein binding // non-traceable author statement	chr17:37977853-37978340 (-) // 88.47 // q21.31
PSMC4	5704	201252_at	0.720051	0.390556	0001824 // blastocyst development // inferred from electronic annotation /// 0006508 // proteolysis // traceable author statement /// 0030163 // protein catabolic process // inferred from electronic annotation /// 0031145 // anaphase-promoting complex-dependent proteasomal ubiquitin-dependent protein catabolic process // not recorded /// 0051436 // negative regulation of ubiquitin-protein ligase …	0000502 // proteasome complex // traceable author statement /// 0005634 // nucleus // inferred from electronic annotation /// 0005634 // nucleus // inferred from direct assay /// 0005737 // cytoplasm // inferred from electronic annotation /// 0005737 // cytoplasm // inferred from direct assay /// 0005829 // cytosol // inferred from electronic annotation /// 0043234 // protein complex // inferred …	0000166 // nucleotide binding // inferred from electronic annotation /// 0005515 // protein binding // inferred from physical interaction /// 0005524 // ATP binding // inferred from electronic annotation /// 0016787 // hydrolase activity // inferred from electronic annotation /// 0016887 // ATPase activity // traceable author statement /// 0017111 // nucleoside-triphosphatase activity // inferred…	chr19:45168937-45179187 (+) // 98.46 // q13.2
PSMC5	5705	209503_s_at	1.15411	1.14467	0006366 // transcription from RNA polymerase II promoter // traceable author statement /// 0016481 // negative regulation of transcription // inferred from electronic annotation /// 0030163 // protein catabolic process // inferred from electronic annotation /// 0031145 // anaphase-promoting complex-dependent proteasomal ubiquitin-dependent protein catabolic process // not recorded /// 0043069 // …	0000502 // proteasome complex // inferred from direct assay /// 0005634 // nucleus // inferred from direct assay /// 0005634 // nucleus // inferred from electronic annotation /// 0005737 // cytoplasm // inferred from direct assay /// 0005737 // cytoplasm // inferred from electronic annotation /// 0005829 // cytosol // inferred from electronic annotation /// 0043234 // protein complex // inferred …	0000166 // nucleotide binding // inferred from electronic annotation /// 0003712 // transcription cofactor activity // traceable author statement /// 0005102 // receptor binding // inferred from electronic annotation /// 0005515 // protein binding // inferred from electronic annotation /// 0005515 // protein binding // inferred from physical interaction /// 0005524 // ATP binding // inferred from…	chr17:59258832-59263111 (+) // 79.92 // q23.3
PSMC6	5706	201699_at	1.12557	1.07796	0006511 // ubiquitin-dependent protein catabolic process // inferred by curator /// 0030163 // protein catabolic process // inferred from electronic annotation /// 0031145 // anaphase-promoting complex-dependent proteasomal ubiquitin-dependent protein catabolic process // not recorded /// 0051436 // negative regulation of ubiquitin-protein ligase activity during mitotic cell cycle // not recorded…	0000502 // proteasome complex // inferred from direct assay /// 0005634 // nucleus // inferred from direct assay /// 0005634 // nucleus // inferred from electronic annotation /// 0005737 // cytoplasm // inferred from electronic annotation /// 0005829 // cytosol // inferred from electronic annotation /// 0043234 // protein complex // inferred from electronic annotation	0000166 // nucleotide binding // inferred from electronic annotation /// 0005515 // protein binding // inferred from physical interaction /// 0005524 // ATP binding // inferred from electronic annotation /// 0008233 // peptidase activity // inferred from electronic annotation /// 0016787 // hydrolase activity // inferred from electronic annotation /// 0016887 // ATPase activity // traceable autho…	chr12:67153777-67155336 (+) // 93.97 // q15 /// chr14:52243671-52264459 (+) // 99.87 // q22.1 /// chr8:57124793-57126329 (-) // 96.79 // q12.1
PSMD1	5707	201198_s_at	1.5906	1.40173	0031145 // anaphase-promoting complex-dependent proteasomal ubiquitin-dependent protein catabolic process // not recorded /// 0042176 // regulation of protein catabolic process // inferred from electronic annotation /// 0051436 // negative regulation of ubiquitin-protein ligase activity during mitotic cell cycle // not recorded /// 0051437 // positive regulation of ubiquitin-protein ligase activi…	0000502 // proteasome complex // traceable author statement /// 0000502 // proteasome complex // inferred from electronic annotation /// 0005829 // cytosol // inferred from electronic annotation /// 0005838 // proteasome regulatory particle // traceable author statement /// 0043234 // protein complex // inferred from electronic annotation	0005488 // binding // inferred from electronic annotation /// 0005515 // protein binding // inferred from physical interaction /// 0030234 // enzyme regulator activity // inferred from electronic annotation	chr2:231629830-231745785 (+) // 96.94 // q37.1
PSMD1	5707	201199_s_at	1.38482	1.30016	0031145 // anaphase-promoting complex-dependent proteasomal ubiquitin-dependent protein catabolic process // not recorded /// 0042176 // regulation of protein catabolic process // inferred from electronic annotation /// 0051436 // negative regulation of ubiquitin-protein ligase activity during mitotic cell cycle // not recorded /// 0051437 // positive regulation of ubiquitin-protein ligase activi…	0000502 // proteasome complex // traceable author statement /// 0000502 // proteasome complex // inferred from electronic annotation /// 0005829 // cytosol // inferred from electronic annotation /// 0005838 // proteasome regulatory particle // traceable author statement /// 0043234 // protein complex // inferred from electronic annotation	0005488 // binding // inferred from electronic annotation /// 0005515 // protein binding // inferred from physical interaction /// 0030234 // enzyme regulator activity // inferred from electronic annotation	chr2:231629900-231745717 (+) // 98.17 // q37.1
PSMD10	5716	1554577_a_at	0.713805	0.739381	0031145 // anaphase-promoting complex-dependent proteasomal ubiquitin-dependent protein catabolic process // not recorded /// 0051436 // negative regulation of ubiquitin-protein ligase activity during mitotic cell cycle // not recorded /// 0051437 // positive regulation of ubiquitin-protein ligase activity during mitotic cell cycle // not recorded	0000502 // proteasome complex // traceable author statement /// 0005737 // cytoplasm // inferred from direct assay /// 0005829 // cytosol // inferred from electronic annotation /// 0005838 // proteasome regulatory particle // traceable author statement /// 0005856 // cytoskeleton // inferred from direct assay /// 0043234 // protein complex // inferred from electronic annotation	0005515 // protein binding // inferred from physical interaction	chrX:107214715-107221428 (-) // 100.0 // q22.3
PSMD10	5716	219485_s_at	0.401792	0.440366	0031145 // anaphase-promoting complex-dependent proteasomal ubiquitin-dependent protein catabolic process // not recorded /// 0051436 // negative regulation of ubiquitin-protein ligase activity during mitotic cell cycle // not recorded /// 0051437 // positive regulation of ubiquitin-protein ligase activity during mitotic cell cycle // not recorded	0000502 // proteasome complex // traceable author statement /// 0005737 // cytoplasm // inferred from direct assay /// 0005829 // cytosol // inferred from electronic annotation /// 0005838 // proteasome regulatory particle // traceable author statement /// 0005856 // cytoskeleton // inferred from direct assay /// 0043234 // protein complex // inferred from electronic annotation	0005515 // protein binding // inferred from physical interaction	chrX:107214094-107221504 (-) // 100.0 // q22.3
PSMD11	5717	208776_at	-0.11719	0.467695	0031145 // anaphase-promoting complex-dependent proteasomal ubiquitin-dependent protein catabolic process // not recorded /// 0051436 // negative regulation of ubiquitin-protein ligase activity during mitotic cell cycle // not recorded /// 0051437 // positive regulation of ubiquitin-protein ligase activity during mitotic cell cycle // not recorded	0000502 // proteasome complex // traceable author statement /// 0005829 // cytosol // inferred from electronic annotation /// 0043234 // protein complex // inferred from electronic annotation	0005515 // protein binding // inferred from physical interaction	chr17:27795614-27834450 (+) // 86.38 // q11.2
PSMD11	5717	208777_s_at	1.20281	1.06523	0031145 // anaphase-promoting complex-dependent proteasomal ubiquitin-dependent protein catabolic process // not recorded /// 0051436 // negative regulation of ubiquitin-protein ligase activity during mitotic cell cycle // not recorded /// 0051437 // positive regulation of ubiquitin-protein ligase activity during mitotic cell cycle // not recorded	0000502 // proteasome complex // traceable author statement /// 0005829 // cytosol // inferred from electronic annotation /// 0043234 // protein complex // inferred from electronic annotation	0005515 // protein binding // inferred from physical interaction	chr17:27795614-27832024 (+) // 95.66 // q11.2
PSMD12	5718	202352_s_at	1.27177	1.13449	0031145 // anaphase-promoting complex-dependent proteasomal ubiquitin-dependent protein catabolic process // not recorded /// 0051436 // negative regulation of ubiquitin-protein ligase activity during mitotic cell cycle // not recorded /// 0051437 // positive regulation of ubiquitin-protein ligase activity during mitotic cell cycle // not recorded	0005829 // cytosol // inferred from electronic annotation /// 0005838 // proteasome regulatory particle // traceable author statement /// 0043234 // protein complex // inferred from electronic annotation	0005515 // protein binding // inferred from physical interaction	chr17:62764494-62793171 (-) // 97.67 // q24.2
PSMD12	5718	202353_s_at	-0.158475	-0.164509	0031145 // anaphase-promoting complex-dependent proteasomal ubiquitin-dependent protein catabolic process // not recorded /// 0051436 // negative regulation of ubiquitin-protein ligase activity during mitotic cell cycle // not recorded /// 0051437 // positive regulation of ubiquitin-protein ligase activity during mitotic cell cycle // not recorded	0005829 // cytosol // inferred from electronic annotation /// 0005838 // proteasome regulatory particle // traceable author statement /// 0043234 // protein complex // inferred from electronic annotation	0005515 // protein binding // inferred from physical interaction	chr17:62764494-62793140 (-) // 98.45 // q24.2
PSMD13	5719	201232_s_at	0.816332	0.533365	0007127 // meiosis I // inferred from electronic annotation /// 0031145 // anaphase-promoting complex-dependent proteasomal ubiquitin-dependent protein catabolic process // not recorded /// 0051436 // negative regulation of ubiquitin-protein ligase activity during mitotic cell cycle // not recorded /// 0051437 // positive regulation of ubiquitin-protein ligase activity during mitotic cell cycle /…	0000502 // proteasome complex // traceable author statement /// 0005829 // cytosol // inferred from electronic annotation /// 0005838 // proteasome regulatory particle // traceable author statement /// 0005838 // proteasome regulatory particle // inferred from electronic annotation /// 0043234 // protein complex // inferred from electronic annotation	0005515 // protein binding // inferred from physical interaction	chr11:226980-242981 (+) // 99.81 // p15.5
PSMD13	5719	201233_at	0.971557	0.627919	0007127 // meiosis I // inferred from electronic annotation /// 0031145 // anaphase-promoting complex-dependent proteasomal ubiquitin-dependent protein catabolic process // not recorded /// 0051436 // negative regulation of ubiquitin-protein ligase activity during mitotic cell cycle // not recorded /// 0051437 // positive regulation of ubiquitin-protein ligase activity during mitotic cell cycle /…	0000502 // proteasome complex // traceable author statement /// 0005829 // cytosol // inferred from electronic annotation /// 0005838 // proteasome regulatory particle // traceable author statement /// 0005838 // proteasome regulatory particle // inferred from electronic annotation /// 0043234 // protein complex // inferred from electronic annotation	0005515 // protein binding // inferred from physical interaction	chr11:226980-242981 (+) // 99.81 // p15.5
PSMD14	10213	212296_at	0.60122	0.596902	0006511 // ubiquitin-dependent protein catabolic process // traceable author statement /// 0031145 // anaphase-promoting complex-dependent proteasomal ubiquitin-dependent protein catabolic process // not recorded /// 0051436 // negative regulation of ubiquitin-protein ligase activity during mitotic cell cycle // not recorded /// 0051437 // positive regulation of ubiquitin-protein ligase activity …	0000502 // proteasome complex // traceable author statement /// 0005634 // nucleus // inferred from direct assay /// 0005730 // nucleolus // inferred from direct assay /// 0005737 // cytoplasm // inferred from direct assay /// 0005829 // cytosol // inferred from electronic annotation /// 0043234 // protein complex // inferred from electronic annotation	0005515 // protein binding // inferred from physical interaction	chr2:161872988-161976474 (+) // 98.05 // q24.2
PSMD2	5708	200830_at	-0.614753	-0.842241	0031145 // anaphase-promoting complex-dependent proteasomal ubiquitin-dependent protein catabolic process // not recorded /// 0042176 // regulation of protein catabolic process // inferred from electronic annotation /// 0051436 // negative regulation of ubiquitin-protein ligase activity during mitotic cell cycle // not recorded /// 0051437 // positive regulation of ubiquitin-protein ligase activi…	0000502 // proteasome complex // traceable author statement /// 0000502 // proteasome complex // inferred from electronic annotation /// 0005829 // cytosol // inferred from electronic annotation /// 0005838 // proteasome regulatory particle // traceable author statement /// 0043234 // protein complex // inferred from electronic annotation	0005488 // binding // inferred from electronic annotation /// 0005515 // protein binding // inferred from physical interaction /// 0030234 // enzyme regulator activity // inferred from electronic annotation	chr3:185499809-185509530 (+) // 97.45 // q27.1 /// chr1:238372432-238375222 (-) // 91.8 // q43
PSMD3	5709	201388_at	0.359642	0.310145	0031145 // anaphase-promoting complex-dependent proteasomal ubiquitin-dependent protein catabolic process // not recorded /// 0042176 // regulation of protein catabolic process // inferred from electronic annotation /// 0051436 // negative regulation of ubiquitin-protein ligase activity during mitotic cell cycle // not recorded /// 0051437 // positive regulation of ubiquitin-protein ligase activi…	0000502 // proteasome complex // traceable author statement /// 0000502 // proteasome complex // inferred from electronic annotation /// 0005829 // cytosol // inferred from electronic annotation /// 0043234 // protein complex // inferred from electronic annotation	0005515 // protein binding // inferred from physical interaction /// 0030234 // enzyme regulator activity // inferred from electronic annotation	chr17:35390607-35407732 (+) // 96.28 // q12
PSMD4	5710	200882_s_at	0.852261	0.893901	0031145 // anaphase-promoting complex-dependent proteasomal ubiquitin-dependent protein catabolic process // not recorded /// 0051436 // negative regulation of ubiquitin-protein ligase activity during mitotic cell cycle // not recorded /// 0051437 // positive regulation of ubiquitin-protein ligase activity during mitotic cell cycle // not recorded	0000502 // proteasome complex // traceable author statement /// 0005829 // cytosol // inferred from electronic annotation /// 0043234 // protein complex // inferred from electronic annotation	0005515 // protein binding // inferred from physical interaction	chr1:149493820-149506560 (+) // 100.0 // q21.2 /// chr10:95708442-95709663 (-) // 90.56 // q23.33
PSMD4	5710	210460_s_at	0.893722	0.86871	0031145 // anaphase-promoting complex-dependent proteasomal ubiquitin-dependent protein catabolic process // not recorded /// 0051436 // negative regulation of ubiquitin-protein ligase activity during mitotic cell cycle // not recorded /// 0051437 // positive regulation of ubiquitin-protein ligase activity during mitotic cell cycle // not recorded	0000502 // proteasome complex // traceable author statement /// 0005829 // cytosol // inferred from electronic annotation /// 0043234 // protein complex // inferred from electronic annotation	0005515 // protein binding // inferred from physical interaction	chr1:149493868-149506332 (+) // 99.84 // q21.2
PSMD4	5710	211609_x_at	0.872263	0.914577	0031145 // anaphase-promoting complex-dependent proteasomal ubiquitin-dependent protein catabolic process // not recorded /// 0051436 // negative regulation of ubiquitin-protein ligase activity during mitotic cell cycle // not recorded /// 0051437 // positive regulation of ubiquitin-protein ligase activity during mitotic cell cycle // not recorded	0000502 // proteasome complex // traceable author statement /// 0005829 // cytosol // inferred from electronic annotation /// 0043234 // protein complex // inferred from electronic annotation	0005515 // protein binding // inferred from physical interaction	chr1:149493856-149506489 (+) // 90.53 // q21.2 /// chr10:95708508-95709663 (-) // 84.44 // q23.33
PSMD5	5711	203447_at	0.0193114	-0.119432	0031145 // anaphase-promoting complex-dependent proteasomal ubiquitin-dependent protein catabolic process // not recorded /// 0051436 // negative regulation of ubiquitin-protein ligase activity during mitotic cell cycle // not recorded /// 0051437 // positive regulation of ubiquitin-protein ligase activity during mitotic cell cycle // not recorded	0000502 // proteasome complex // traceable author statement /// 0005634 // nucleus // inferred from direct assay /// 0005737 // cytoplasm // inferred from direct assay /// 0005829 // cytosol // inferred from electronic annotation /// 0043234 // protein complex // inferred from electronic annotation	0005488 // binding // inferred from electronic annotation	chr9:122618151-122645011 (-) // 82.04 // q33.2
PSMD6	9861	202753_at	0.861848	0.764498	0006508 // proteolysis // non-traceable author statement /// 0031145 // anaphase-promoting complex-dependent proteasomal ubiquitin-dependent protein catabolic process // not recorded /// 0051436 // negative regulation of ubiquitin-protein ligase activity during mitotic cell cycle // not recorded /// 0051437 // positive regulation of ubiquitin-protein ligase activity during mitotic cell cycle // n…	0000502 // proteasome complex // non-traceable author statement /// 0005829 // cytosol // inferred from electronic annotation /// 0043234 // protein complex // inferred from electronic annotation	0005515 // protein binding // inferred from physical interaction /// 0016887 // ATPase activity // non-traceable author statement	chr3:63971270-63984160 (-) // 99.92 // p14.1
PSMD7	5713	201705_at	0.754695	0.853305	0031145 // anaphase-promoting complex-dependent proteasomal ubiquitin-dependent protein catabolic process // not recorded /// 0051436 // negative regulation of ubiquitin-protein ligase activity during mitotic cell cycle // not recorded /// 0051437 // positive regulation of ubiquitin-protein ligase activity during mitotic cell cycle // not recorded	0000502 // proteasome complex // traceable author statement /// 0005829 // cytosol // inferred from electronic annotation /// 0005838 // proteasome regulatory particle // traceable author statement /// 0043234 // protein complex // inferred from electronic annotation	0005515 // protein binding // inferred from physical interaction	chr16:72888234-72897673 (+) // 90.7 // q22.3
PSMD7	5713	238738_at	0.543055	0.885976	0031145 // anaphase-promoting complex-dependent proteasomal ubiquitin-dependent protein catabolic process // not recorded /// 0051436 // negative regulation of ubiquitin-protein ligase activity during mitotic cell cycle // not recorded /// 0051437 // positive regulation of ubiquitin-protein ligase activity during mitotic cell cycle // not recorded	0000502 // proteasome complex // traceable author statement /// 0005829 // cytosol // inferred from electronic annotation /// 0005838 // proteasome regulatory particle // traceable author statement /// 0043234 // protein complex // inferred from electronic annotation	0005515 // protein binding // inferred from physical interaction	chr16:72888459-72889555 (+) // 84.92 // q22.3
PSMD7	5713	244515_at	-0.318275	0.320636	0031145 // anaphase-promoting complex-dependent proteasomal ubiquitin-dependent protein catabolic process // not recorded /// 0051436 // negative regulation of ubiquitin-protein ligase activity during mitotic cell cycle // not recorded /// 0051437 // positive regulation of ubiquitin-protein ligase activity during mitotic cell cycle // not recorded	0000502 // proteasome complex // traceable author statement /// 0005829 // cytosol // inferred from electronic annotation /// 0005838 // proteasome regulatory particle // traceable author statement /// 0043234 // protein complex // inferred from electronic annotation	0005515 // protein binding // inferred from physical interaction	chr16:72889596-72890100 (+) // 78.17 // q22.3
PSMD8	5714	200820_at	-0.0935264	-0.431691	0006508 // proteolysis // inferred from electronic annotation /// 0031145 // anaphase-promoting complex-dependent proteasomal ubiquitin-dependent protein catabolic process // not recorded /// 0051436 // negative regulation of ubiquitin-protein ligase activity during mitotic cell cycle // not recorded /// 0051437 // positive regulation of ubiquitin-protein ligase activity during mitotic cell cycle…	0000502 // proteasome complex // traceable author statement /// 0005634 // nucleus // inferred from direct assay /// 0005730 // nucleolus // inferred from direct assay /// 0005737 // cytoplasm // inferred from direct assay /// 0005829 // cytosol // inferred from electronic annotation /// 0005838 // proteasome regulatory particle // traceable author statement /// 0005838 // proteasome regulatory p…	0005515 // protein binding // inferred from physical interaction	chr19:43557290-43565954 (+) // 100.0 // q13.2
PSMD9	5715	207805_s_at	-0.0226598	0.0112305	0006511 // ubiquitin-dependent protein catabolic process // non-traceable author statement /// 0031145 // anaphase-promoting complex-dependent proteasomal ubiquitin-dependent protein catabolic process // not recorded /// 0032024 // positive regulation of insulin secretion // inferred from sequence or structural similarity /// 0045941 // positive regulation of transcription // inferred from sequen…	0005634 // nucleus // inferred from sequence or structural similarity /// 0005829 // cytosol // inferred from electronic annotation /// 0005838 // proteasome regulatory particle // non-traceable author statement /// 0043234 // protein complex // inferred from electronic annotation	0003713 // transcription coactivator activity // inferred from sequence or structural similarity /// 0005515 // protein binding // inferred from electronic annotation /// 0043425 // bHLH transcription factor binding // inferred from sequence or structural similarity	chr12:120811020-120838932 (+) // 92.54 // q24.31
PSME1	5720	200814_at	0.812201	0.992157	0019884 // antigen processing and presentation of exogenous antigen // inferred from electronic annotation /// 0031145 // anaphase-promoting complex-dependent proteasomal ubiquitin-dependent protein catabolic process // not recorded /// 0051436 // negative regulation of ubiquitin-protein ligase activity during mitotic cell cycle // not recorded /// 0051437 // positive regulation of ubiquitin-prot…	0000502 // proteasome complex // traceable author statement /// 0005634 // nucleus // inferred from direct assay /// 0005730 // nucleolus // inferred from direct assay /// 0005737 // cytoplasm // traceable author statement /// 0005737 // cytoplasm // inferred from direct assay /// 0005829 // cytosol // inferred from electronic annotation /// 0008537 // proteasome activator complex // inferred fro…	0005515 // protein binding // inferred from electronic annotation /// 0008538 // proteasome activator activity // inferred from electronic annotation	chr14:23675219-23678008 (+) // 100.0 // q12
PSME2	5721	201762_s_at	0.617973	0.871722	0031145 // anaphase-promoting complex-dependent proteasomal ubiquitin-dependent protein catabolic process // not recorded /// 0051436 // negative regulation of ubiquitin-protein ligase activity during mitotic cell cycle // not recorded /// 0051437 // positive regulation of ubiquitin-protein ligase activity during mitotic cell cycle // not recorded	0000502 // proteasome complex // traceable author statement /// 0005829 // cytosol // inferred from electronic annotation /// 0008537 // proteasome activator complex // inferred from electronic annotation /// 0043234 // protein complex // inferred from electronic annotation	0008538 // proteasome activator activity // inferred from electronic annotation	chr13:48243232-48244007 (+) // 90.1 // q14.2 /// chr5:97574832-97575624 (+) // 91.55 // q21.1 /// chr14:23682414-23685694 (-) // 99.52 // q12
PSME3	10197	200987_x_at	1.21516	0.971086	0031145 // anaphase-promoting complex-dependent proteasomal ubiquitin-dependent protein catabolic process // not recorded /// 0051436 // negative regulation of ubiquitin-protein ligase activity during mitotic cell cycle // not recorded /// 0051437 // positive regulation of ubiquitin-protein ligase activity during mitotic cell cycle // not recorded	0000502 // proteasome complex // traceable author statement /// 0005829 // cytosol // inferred from electronic annotation /// 0008537 // proteasome activator complex // inferred from electronic annotation /// 0043234 // protein complex // inferred from electronic annotation	0005515 // protein binding // inferred from physical interaction /// 0008538 // proteasome activator activity // inferred from electronic annotation /// 0042802 // identical protein binding // inferred from physical interaction	chr17:38238941-38249303 (+) // 95.3 // q21.31
PSME3	10197	200988_s_at	0.49704	0.0496259	0031145 // anaphase-promoting complex-dependent proteasomal ubiquitin-dependent protein catabolic process // not recorded /// 0051436 // negative regulation of ubiquitin-protein ligase activity during mitotic cell cycle // not recorded /// 0051437 // positive regulation of ubiquitin-protein ligase activity during mitotic cell cycle // not recorded	0000502 // proteasome complex // traceable author statement /// 0005829 // cytosol // inferred from electronic annotation /// 0008537 // proteasome activator complex // inferred from electronic annotation /// 0043234 // protein complex // inferred from electronic annotation	0005515 // protein binding // inferred from physical interaction /// 0008538 // proteasome activator activity // inferred from electronic annotation /// 0042802 // identical protein binding // inferred from physical interaction	chr17:38239013-38249049 (+) // 97.72 // q21.31
PSME3	10197	209852_x_at	0.160945	0.0768266	0031145 // anaphase-promoting complex-dependent proteasomal ubiquitin-dependent protein catabolic process // not recorded /// 0051436 // negative regulation of ubiquitin-protein ligase activity during mitotic cell cycle // not recorded /// 0051437 // positive regulation of ubiquitin-protein ligase activity during mitotic cell cycle // not recorded	0000502 // proteasome complex // traceable author statement /// 0005829 // cytosol // inferred from electronic annotation /// 0008537 // proteasome activator complex // inferred from electronic annotation /// 0043234 // protein complex // inferred from electronic annotation	0005515 // protein binding // inferred from physical interaction /// 0008538 // proteasome activator activity // inferred from electronic annotation /// 0042802 // identical protein binding // inferred from physical interaction	chr17:38238957-38248790 (+) // 94.83 // q21.31
PSME3	10197	209853_s_at	1.12028	0.822858	0031145 // anaphase-promoting complex-dependent proteasomal ubiquitin-dependent protein catabolic process // not recorded /// 0051436 // negative regulation of ubiquitin-protein ligase activity during mitotic cell cycle // not recorded /// 0051437 // positive regulation of ubiquitin-protein ligase activity during mitotic cell cycle // not recorded	0000502 // proteasome complex // traceable author statement /// 0005829 // cytosol // inferred from electronic annotation /// 0008537 // proteasome activator complex // inferred from electronic annotation /// 0043234 // protein complex // inferred from electronic annotation	0005515 // protein binding // inferred from physical interaction /// 0008538 // proteasome activator activity // inferred from electronic annotation /// 0042802 // identical protein binding // inferred from physical interaction	chr17:38238978-38247278 (+) // 90.6 // q21.31
PSME4	23198	212219_at	0.820252	0.807681	0007275 // multicellular organismal development // inferred from electronic annotation /// 0007283 // spermatogenesis // inferred from electronic annotation /// 0030154 // cell differentiation // inferred from electronic annotation	0005634 // nucleus // inferred from electronic annotation /// 0005829 // cytosol // inferred from electronic annotation /// 0016607 // nuclear speck // inferred from electronic annotation /// 0043234 // protein complex // inferred from electronic annotation	0005488 // binding // inferred from electronic annotation	chr2:53944709-54051291 (-) // 97.97 // p16.2
PSME4	23198	212220_at	0.734738	0.410604	0007275 // multicellular organismal development // inferred from electronic annotation /// 0007283 // spermatogenesis // inferred from electronic annotation /// 0030154 // cell differentiation // inferred from electronic annotation	0005634 // nucleus // inferred from electronic annotation /// 0005829 // cytosol // inferred from electronic annotation /// 0016607 // nuclear speck // inferred from electronic annotation /// 0043234 // protein complex // inferred from electronic annotation	0005488 // binding // inferred from electronic annotation	chr2:53944709-54051291 (-) // 97.97 // p16.2
PSME4	23198	212222_at	-0.529031	-0.31902	0007275 // multicellular organismal development // inferred from electronic annotation /// 0007283 // spermatogenesis // inferred from electronic annotation /// 0030154 // cell differentiation // inferred from electronic annotation	0005634 // nucleus // inferred from electronic annotation /// 0005829 // cytosol // inferred from electronic annotation /// 0016607 // nuclear speck // inferred from electronic annotation /// 0043234 // protein complex // inferred from electronic annotation	0005488 // binding // inferred from electronic annotation	chr2:53944709-54051291 (-) // 97.97 // p16.2
PSME4	23198	237180_at	-1.13623	-0.0605298	0007275 // multicellular organismal development // inferred from electronic annotation /// 0007283 // spermatogenesis // inferred from electronic annotation /// 0030154 // cell differentiation // inferred from electronic annotation	0005634 // nucleus // inferred from electronic annotation /// 0005829 // cytosol // inferred from electronic annotation /// 0016607 // nuclear speck // inferred from electronic annotation /// 0043234 // protein complex // inferred from electronic annotation	0005488 // binding // inferred from electronic annotation	chr2:54050344-54050754 (-) // 98.09 // p16.2
PSMF1	9491	201052_s_at	0.291805	0.236904	0006511 // ubiquitin-dependent protein catabolic process // non-traceable author statement /// 0031145 // anaphase-promoting complex-dependent proteasomal ubiquitin-dependent protein catabolic process // not recorded /// 0051436 // negative regulation of ubiquitin-protein ligase activity during mitotic cell cycle // not recorded /// 0051437 // positive regulation of ubiquitin-protein ligase activ…	0005829 // cytosol // inferred from electronic annotation /// 0005839 // proteasome core complex // non-traceable author statement /// 0043234 // protein complex // inferred from electronic annotation	0005515 // protein binding // inferred from physical interaction /// 0008539 // proteasome inhibitor activity // non-traceable author statement	chr20:1047269-1096171 (+) // 84.41 // p13
PSMF1	9491	201053_s_at	-0.317612	-0.329204	0006511 // ubiquitin-dependent protein catabolic process // non-traceable author statement /// 0031145 // anaphase-promoting complex-dependent proteasomal ubiquitin-dependent protein catabolic process // not recorded /// 0051436 // negative regulation of ubiquitin-protein ligase activity during mitotic cell cycle // not recorded /// 0051437 // positive regulation of ubiquitin-protein ligase activ…	0005829 // cytosol // inferred from electronic annotation /// 0005839 // proteasome core complex // non-traceable author statement /// 0043234 // protein complex // inferred from electronic annotation	0005515 // protein binding // inferred from physical interaction /// 0008539 // proteasome inhibitor activity // non-traceable author statement	chr20:1047303-1095955 (+) // 88.83 // p13
PSMF1	9491	235993_at	0.00140947	0.105433	0006511 // ubiquitin-dependent protein catabolic process // non-traceable author statement /// 0031145 // anaphase-promoting complex-dependent proteasomal ubiquitin-dependent protein catabolic process // not recorded /// 0051436 // negative regulation of ubiquitin-protein ligase activity during mitotic cell cycle // not recorded /// 0051437 // positive regulation of ubiquitin-protein ligase activ…	0005829 // cytosol // inferred from electronic annotation /// 0005839 // proteasome core complex // non-traceable author statement /// 0043234 // protein complex // inferred from electronic annotation	0005515 // protein binding // inferred from physical interaction /// 0008539 // proteasome inhibitor activity // non-traceable author statement	chr20:1096976-1097602 (+) // 99.52 // p13
PSMF1	9491	236012_at	0.292875	-0.204114	0006511 // ubiquitin-dependent protein catabolic process // non-traceable author statement /// 0031145 // anaphase-promoting complex-dependent proteasomal ubiquitin-dependent protein catabolic process // not recorded /// 0051436 // negative regulation of ubiquitin-protein ligase activity during mitotic cell cycle // not recorded /// 0051437 // positive regulation of ubiquitin-protein ligase activ…	0005829 // cytosol // inferred from electronic annotation /// 0005839 // proteasome core complex // non-traceable author statement /// 0043234 // protein complex // inferred from electronic annotation	0005515 // protein binding // inferred from physical interaction /// 0008539 // proteasome inhibitor activity // non-traceable author statement	chr20:1096596-1097014 (+) // 70.21 // p13
PSMG1	8624	203405_at	1.53078	1.36199	0043248 // proteasome assembly // inferred from direct assay /// 0043248 // proteasome assembly // inferred from electronic annotation	0005737 // cytoplasm // inferred from direct assay /// 0005737 // cytoplasm // inferred from electronic annotation /// 0005783 // endoplasmic reticulum // inferred from direct assay /// 0005783 // endoplasmic reticulum // inferred from electronic annotation	0005515 // protein binding // inferred from physical interaction /// 0005515 // protein binding // inferred from electronic annotation	chr21:39469257-39477245 (-) // 94.44 // q22.2
PSMG1	8624	238890_at	-2.38807	-1.6666	0043248 // proteasome assembly // inferred from direct assay /// 0043248 // proteasome assembly // inferred from electronic annotation	0005737 // cytoplasm // inferred from direct assay /// 0005737 // cytoplasm // inferred from electronic annotation /// 0005783 // endoplasmic reticulum // inferred from direct assay /// 0005783 // endoplasmic reticulum // inferred from electronic annotation	0005515 // protein binding // inferred from physical interaction /// 0005515 // protein binding // inferred from electronic annotation	chr21:39477971-39478695 (-) // 94.39 // q22.2
PSMG2	56984	218467_at	0.73911	0.726521	0006915 // apoptosis // inferred from electronic annotation /// 0007094 // mitotic cell cycle spindle assembly checkpoint // inferred from electronic annotation /// 0042981 // regulation of apoptosis // inferred from electronic annotation /// 0043248 // proteasome assembly // inferred from direct assay /// 0051726 // regulation of cell cycle // inferred from electronic annotation	0005634 // nucleus // inferred from sequence or structural similarity /// 0005634 // nucleus // inferred from electronic annotation	0005515 // protein binding // inferred from physical interaction	chr18:12693048-12715737 (+) // 96.14 // p11.21
PSMG3	84262	223363_at	0.0562768	0.284087				chr7:1573497-1575734 (-) // 89.04 // p22.3
PSMG4	389362	228217_s_at	0.599869	0.489372				chr6:3204202-3213299 (+) // 99.11 // p25.2
PSMG4	389362	242055_at	-0.00601945	0.0274398				chr6:3235235-3235693 (-) // 96.42 // p25.2
PTEN	5728	204053_x_at	0.57462	0.231043	0000079 // regulation of cyclin-dependent protein kinase activity // traceable author statement /// 0001525 // angiogenesis // inferred from electronic annotation /// 0006470 // protein amino acid dephosphorylation // inferred from direct assay /// 0006470 // protein amino acid dephosphorylation // traceable author statement /// 0006470 // protein amino acid dephosphorylation // inferred from ele…	0005634 // nucleus // inferred from direct assay /// 0005737 // cytoplasm // inferred from direct assay /// 0005737 // cytoplasm // traceable author statement /// 0005737 // cytoplasm // inferred from electronic annotation /// 0005829 // cytosol // not recorded	0000287 // magnesium ion binding // inferred from electronic annotation /// 0004438 // phosphatidylinositol-3-phosphatase activity // inferred from direct assay /// 0004721 // phosphoprotein phosphatase activity // inferred from electronic annotation /// 0004722 // protein serine/threonine phosphatase activity // inferred from direct assay /// 0004725 // protein tyrosine phosphatase activity // i…	chr10:89613415-89715263 (+) // 92.05 // q23.31 /// chr9:33665383-33667446 (-) // 87.84 // p13.3
PTEN	5728	204054_at	-0.16563	-0.411248	0000079 // regulation of cyclin-dependent protein kinase activity // traceable author statement /// 0001525 // angiogenesis // inferred from electronic annotation /// 0006470 // protein amino acid dephosphorylation // inferred from direct assay /// 0006470 // protein amino acid dephosphorylation // traceable author statement /// 0006470 // protein amino acid dephosphorylation // inferred from ele…	0005634 // nucleus // inferred from direct assay /// 0005737 // cytoplasm // inferred from direct assay /// 0005737 // cytoplasm // traceable author statement /// 0005737 // cytoplasm // inferred from electronic annotation /// 0005829 // cytosol // not recorded	0000287 // magnesium ion binding // inferred from electronic annotation /// 0004438 // phosphatidylinositol-3-phosphatase activity // inferred from direct assay /// 0004721 // phosphoprotein phosphatase activity // inferred from electronic annotation /// 0004722 // protein serine/threonine phosphatase activity // inferred from direct assay /// 0004725 // protein tyrosine phosphatase activity // i…	chr10:89613174-89716111 (+) // 93.29 // q23.31 /// chr9:33664540-33667497 (-) // 85.63 // p13.3
PTEN	5728	211711_s_at	0.26754	0.0868383	0000079 // regulation of cyclin-dependent protein kinase activity // traceable author statement /// 0001525 // angiogenesis // inferred from electronic annotation /// 0006470 // protein amino acid dephosphorylation // inferred from direct assay /// 0006470 // protein amino acid dephosphorylation // traceable author statement /// 0006470 // protein amino acid dephosphorylation // inferred from ele…	0005634 // nucleus // inferred from direct assay /// 0005737 // cytoplasm // inferred from direct assay /// 0005737 // cytoplasm // traceable author statement /// 0005737 // cytoplasm // inferred from electronic annotation /// 0005829 // cytosol // not recorded	0000287 // magnesium ion binding // inferred from electronic annotation /// 0004438 // phosphatidylinositol-3-phosphatase activity // inferred from direct assay /// 0004721 // phosphoprotein phosphatase activity // inferred from electronic annotation /// 0004722 // protein serine/threonine phosphatase activity // inferred from direct assay /// 0004725 // protein tyrosine phosphatase activity // i…	chr10:89613369-89715495 (+) // 93.03 // q23.31 /// chr9:33665153-33667492 (-) // 89.14 // p13.3
PTEN	5728	225363_at	-0.869875	-0.793068	0000079 // regulation of cyclin-dependent protein kinase activity // traceable author statement /// 0001525 // angiogenesis // inferred from electronic annotation /// 0006470 // protein amino acid dephosphorylation // inferred from direct assay /// 0006470 // protein amino acid dephosphorylation // traceable author statement /// 0006470 // protein amino acid dephosphorylation // inferred from ele…	0005634 // nucleus // inferred from direct assay /// 0005737 // cytoplasm // inferred from direct assay /// 0005737 // cytoplasm // traceable author statement /// 0005737 // cytoplasm // inferred from electronic annotation /// 0005829 // cytosol // not recorded	0000287 // magnesium ion binding // inferred from electronic annotation /// 0004438 // phosphatidylinositol-3-phosphatase activity // inferred from direct assay /// 0004721 // phosphoprotein phosphatase activity // inferred from electronic annotation /// 0004722 // protein serine/threonine phosphatase activity // inferred from direct assay /// 0004725 // protein tyrosine phosphatase activity // i…	chr10:89716399-89718512 (+) // 94.51 // q23.31
PTEN	5728	233254_x_at	-2.12972	-1.20777	0000079 // regulation of cyclin-dependent protein kinase activity // traceable author statement /// 0001525 // angiogenesis // inferred from electronic annotation /// 0006470 // protein amino acid dephosphorylation // inferred from direct assay /// 0006470 // protein amino acid dephosphorylation // traceable author statement /// 0006470 // protein amino acid dephosphorylation // inferred from ele…	0005634 // nucleus // inferred from direct assay /// 0005737 // cytoplasm // inferred from direct assay /// 0005737 // cytoplasm // traceable author statement /// 0005737 // cytoplasm // inferred from electronic annotation /// 0005829 // cytosol // not recorded	0000287 // magnesium ion binding // inferred from electronic annotation /// 0004438 // phosphatidylinositol-3-phosphatase activity // inferred from direct assay /// 0004721 // phosphoprotein phosphatase activity // inferred from electronic annotation /// 0004722 // protein serine/threonine phosphatase activity // inferred from direct assay /// 0004725 // protein tyrosine phosphatase activity // i…	chr10:89697714-89698674 (+) // 11.49 // q23.31
PTEN	5728	233314_at	-1.16716	-0.6521	0000079 // regulation of cyclin-dependent protein kinase activity // traceable author statement /// 0001525 // angiogenesis // inferred from electronic annotation /// 0006470 // protein amino acid dephosphorylation // inferred from direct assay /// 0006470 // protein amino acid dephosphorylation // traceable author statement /// 0006470 // protein amino acid dephosphorylation // inferred from ele…	0005634 // nucleus // inferred from direct assay /// 0005737 // cytoplasm // inferred from direct assay /// 0005737 // cytoplasm // traceable author statement /// 0005737 // cytoplasm // inferred from electronic annotation /// 0005829 // cytosol // not recorded	0000287 // magnesium ion binding // inferred from electronic annotation /// 0004438 // phosphatidylinositol-3-phosphatase activity // inferred from direct assay /// 0004721 // phosphoprotein phosphatase activity // inferred from electronic annotation /// 0004722 // protein serine/threonine phosphatase activity // inferred from direct assay /// 0004725 // protein tyrosine phosphatase activity // i…	chr10:89696904-89700552 (+) // 29.42 // q23.31
RAD23B	5887	201222_s_at	0.200575	0.0749203	0000718 // nucleotide-excision repair, DNA damage removal // not recorded /// 0006281 // DNA repair // inferred from electronic annotation /// 0006289 // nucleotide-excision repair // inferred from electronic annotation /// 0006289 // nucleotide-excision repair // traceable author statement /// 0006464 // protein modification process // inferred from electronic annotation /// 0006974 // response …	0005634 // nucleus // traceable author statement /// 0005634 // nucleus // inferred from electronic annotation /// 0005654 // nucleoplasm // not recorded /// 0005737 // cytoplasm // inferred from electronic annotation /// 0005829 // cytosol // inferred from electronic annotation /// 0043234 // protein complex // inferred from electronic annotation	0003684 // damaged DNA binding // inferred from electronic annotation /// 0003697 // single-stranded DNA binding // traceable author statement /// 0005515 // protein binding // inferred from physical interaction	chr9:109085301-109133406 (+) // 95.78 // q31.2
RAD23B	5887	201223_s_at	-0.202464	-0.129492	0000718 // nucleotide-excision repair, DNA damage removal // not recorded /// 0006281 // DNA repair // inferred from electronic annotation /// 0006289 // nucleotide-excision repair // inferred from electronic annotation /// 0006289 // nucleotide-excision repair // traceable author statement /// 0006464 // protein modification process // inferred from electronic annotation /// 0006974 // response …	0005634 // nucleus // traceable author statement /// 0005634 // nucleus // inferred from electronic annotation /// 0005654 // nucleoplasm // not recorded /// 0005737 // cytoplasm // inferred from electronic annotation /// 0005829 // cytosol // inferred from electronic annotation /// 0043234 // protein complex // inferred from electronic annotation	0003684 // damaged DNA binding // inferred from electronic annotation /// 0003697 // single-stranded DNA binding // traceable author statement /// 0005515 // protein binding // inferred from physical interaction	chr9:109085417-109133120 (+) // 99.97 // q31.2
RAD23B	5887	223598_at	-0.324862	0.183829	0000718 // nucleotide-excision repair, DNA damage removal // not recorded /// 0006281 // DNA repair // inferred from electronic annotation /// 0006289 // nucleotide-excision repair // inferred from electronic annotation /// 0006289 // nucleotide-excision repair // traceable author statement /// 0006412 // translation // inferred from electronic annotation /// 0006413 // translational initiation /…	0005634 // nucleus // traceable author statement /// 0005634 // nucleus // inferred from electronic annotation /// 0005654 // nucleoplasm // not recorded /// 0005737 // cytoplasm // inferred from electronic annotation /// 0005829 // cytosol // inferred from electronic annotation /// 0043234 // protein complex // inferred from electronic annotation	0003684 // damaged DNA binding // inferred from electronic annotation /// 0003697 // single-stranded DNA binding // traceable author statement /// 0003743 // translation initiation factor activity // inferred from electronic annotation /// 0005515 // protein binding // inferred from physical interaction	chr9:109133504-109134294 (+) // 32.24 // q31.2 /// chr3:172092913-172108326 (-) // 60.91 // q26.2
RAF1	5894	1557675_at	-0.397054	0.132781	0006468 // protein amino acid phosphorylation // traceable author statement /// 0006468 // protein amino acid phosphorylation // inferred from electronic annotation /// 0006915 // apoptosis // traceable author statement /// 0006915 // apoptosis // inferred from electronic annotation /// 0007010 // cytoskeleton organization // inferred from electronic annotation /// 0007165 // signal transduction …	0005741 // mitochondrial outer membrane // traceable author statement /// 0005829 // cytosol // not recorded /// 0005886 // plasma membrane // not recorded	0000166 // nucleotide binding // inferred from electronic annotation /// 0004672 // protein kinase activity // inferred from electronic annotation /// 0004672 // protein kinase activity // traceable author statement /// 0004674 // protein serine/threonine kinase activity // inferred from electronic annotation /// 0005057 // receptor signaling protein activity // inferred from electronic annotatio…	chr3:12604484-12606279 (-) // 13.7 // p25.1
RAF1	5894	201244_s_at	0.00307804	-0.00907182	0006468 // protein amino acid phosphorylation // traceable author statement /// 0006468 // protein amino acid phosphorylation // inferred from electronic annotation /// 0006915 // apoptosis // traceable author statement /// 0006915 // apoptosis // inferred from electronic annotation /// 0007010 // cytoskeleton organization // inferred from electronic annotation /// 0007165 // signal transduction …	0005741 // mitochondrial outer membrane // traceable author statement /// 0005829 // cytosol // not recorded /// 0005886 // plasma membrane // not recorded	0000166 // nucleotide binding // inferred from electronic annotation /// 0004672 // protein kinase activity // inferred from electronic annotation /// 0004672 // protein kinase activity // traceable author statement /// 0004674 // protein serine/threonine kinase activity // inferred from electronic annotation /// 0005057 // receptor signaling protein activity // inferred from electronic annotatio…	chr3:12600107-12680414 (-) // 98.42 // p25.1
RPS27A	6233	200017_at	-0.0141511	0.0157342	0006412 // translation // inferred from electronic annotation /// 0006412 // translation // inferred by curator /// 0006414 // translational elongation // not recorded /// 0006464 // protein modification process // inferred from electronic annotation /// 0007049 // cell cycle // traceable author statement /// 0007411 // axon guidance // traceable author statement /// 0016567 // protein ubiquitina…	0005622 // intracellular // inferred from electronic annotation /// 0005634 // nucleus // inferred by curator /// 0005634 // nucleus // inferred from electronic annotation /// 0005737 // cytoplasm // inferred from electronic annotation /// 0005829 // cytosol // not recorded /// 0005840 // ribosome // inferred from electronic annotation /// 0015935 // small ribosomal subunit // inferred from direc…	0003735 // structural constituent of ribosome // inferred from direct assay /// 0003735 // structural constituent of ribosome // inferred from electronic annotation /// 0005515 // protein binding // inferred from electronic annotation /// 0005515 // protein binding // inferred from physical interaction /// 0008270 // zinc ion binding // inferred from electronic annotation /// 0030528 // transcrip…	chr1:190951897-190952436 (+) // 93.89 // q31.2 /// chr17:10102765-10103304 (+) // 93.7 // p13.1 /// chr2:55313327-55316248 (+) // 99.63 // p16.1 /// chr20:17445460-17445986 (+) // 90.0 // p12.1 /// chr6:114009357-114009893 (+) // 94.81 // q22.1 /// chr7:156677784-156678317 (+) // 93.33 // q36.3 /// chr16:59646819-59647343 (-) // 95.37 // q21
RPS27A	6233	242214_at	-0.741272	-0.596041	0006412 // translation // inferred from electronic annotation /// 0006412 // translation // inferred by curator /// 0006414 // translational elongation // not recorded /// 0006464 // protein modification process // inferred from electronic annotation /// 0007049 // cell cycle // traceable author statement /// 0007411 // axon guidance // traceable author statement /// 0016567 // protein ubiquitina…	0005622 // intracellular // inferred from electronic annotation /// 0005634 // nucleus // inferred by curator /// 0005634 // nucleus // inferred from electronic annotation /// 0005737 // cytoplasm // inferred from electronic annotation /// 0005829 // cytosol // not recorded /// 0005840 // ribosome // inferred from electronic annotation /// 0015935 // small ribosomal subunit // inferred from direc…	0003735 // structural constituent of ribosome // inferred from direct assay /// 0003735 // structural constituent of ribosome // inferred from electronic annotation /// 0005515 // protein binding // inferred from electronic annotation /// 0005515 // protein binding // inferred from physical interaction /// 0008270 // zinc ion binding // inferred from electronic annotation /// 0030528 // transcrip…	chr2:55316223-55316667 (+) // 61.24 // p16.1
RPS27A	6233	244624_at	-0.293029	-0.48477	0006414 // translational elongation // not recorded	0005622 // intracellular // inferred from electronic annotation /// 0005829 // cytosol // not recorded /// 0005840 // ribosome // inferred from electronic annotation /// 0022627 // cytosolic small ribosomal subunit // inferred from direct assay	0003735 // structural constituent of ribosome // inferred from direct assay /// 0005515 // protein binding // inferred from electronic annotation /// 0008270 // zinc ion binding // inferred from electronic annotation /// 0046872 // metal ion binding // inferred from electronic annotation	chr2:55313354-55313806 (+) // 82.33 // p16.1
SIAH1	6477	202980_s_at	-0.775949	-0.630774	0006508 // proteolysis // traceable author statement /// 0006511 // ubiquitin-dependent protein catabolic process // inferred from electronic annotation /// 0006915 // apoptosis // traceable author statement /// 0006915 // apoptosis // inferred from electronic annotation /// 0007049 // cell cycle // inferred from electronic annotation /// 0007275 // multicellular organismal development // inferre…	0005634 // nucleus // inferred from electronic annotation /// 0005737 // cytoplasm // traceable author statement /// 0005737 // cytoplasm // inferred from electronic annotation	0004842 // ubiquitin-protein ligase activity // inferred from electronic annotation /// 0005515 // protein binding // inferred from electronic annotation /// 0005515 // protein binding // inferred from physical interaction /// 0008022 // protein C-terminus binding // inferred from physical interaction /// 0008270 // zinc ion binding // inferred from direct assay /// 0008270 // zinc ion binding //…	chr16:46951942-46953845 (-) // 83.81 // q12.1
SIAH1	6477	202981_x_at	-0.886681	-0.748152	0006508 // proteolysis // traceable author statement /// 0006511 // ubiquitin-dependent protein catabolic process // inferred from electronic annotation /// 0006915 // apoptosis // traceable author statement /// 0006915 // apoptosis // inferred from electronic annotation /// 0007049 // cell cycle // inferred from electronic annotation /// 0007275 // multicellular organismal development // inferre…	0005634 // nucleus // inferred from electronic annotation /// 0005737 // cytoplasm // traceable author statement /// 0005737 // cytoplasm // inferred from electronic annotation	0004842 // ubiquitin-protein ligase activity // inferred from electronic annotation /// 0005515 // protein binding // inferred from electronic annotation /// 0005515 // protein binding // inferred from physical interaction /// 0008022 // protein C-terminus binding // inferred from physical interaction /// 0008270 // zinc ion binding // inferred from direct assay /// 0008270 // zinc ion binding //…	chr16:46951971-46976800 (-) // 91.31 // q12.1
SIAH1	6477	232365_at	-2.57477	-1.56771	0006508 // proteolysis // traceable author statement /// 0006511 // ubiquitin-dependent protein catabolic process // inferred from electronic annotation /// 0006915 // apoptosis // traceable author statement /// 0006915 // apoptosis // inferred from electronic annotation /// 0007049 // cell cycle // inferred from electronic annotation /// 0007275 // multicellular organismal development // inferre…	0005634 // nucleus // inferred from electronic annotation /// 0005737 // cytoplasm // traceable author statement /// 0005737 // cytoplasm // inferred from electronic annotation	0004842 // ubiquitin-protein ligase activity // inferred from electronic annotation /// 0005515 // protein binding // inferred from electronic annotation /// 0005515 // protein binding // inferred from physical interaction /// 0008022 // protein C-terminus binding // inferred from physical interaction /// 0008270 // zinc ion binding // inferred from direct assay /// 0008270 // zinc ion binding //…	chr16:46955377-46957297 (-) // 85.65 // q12.1
TAP1	6890	202307_s_at	-1.68273	-0.779039	0006810 // transport // inferred from electronic annotation /// 0006857 // oligopeptide transport // inferred from electronic annotation /// 0006952 // defense response // inferred from electronic annotation /// 0006952 // defense response // traceable author statement /// 0006955 // immune response // inferred from electronic annotation /// 0015031 // protein transport // inferred from electroni…	0005624 // membrane fraction // traceable author statement /// 0005783 // endoplasmic reticulum // inferred from electronic annotation /// 0005789 // endoplasmic reticulum membrane // inferred from electronic annotation /// 0005887 // integral to plasma membrane // traceable author statement /// 0016020 // membrane // inferred from electronic annotation /// 0016021 // integral to membrane // non-…	0000166 // nucleotide binding // inferred from electronic annotation /// 0005215 // transporter activity // inferred from electronic annotation /// 0005215 // transporter activity // traceable author statement /// 0005515 // protein binding // inferred from physical interaction /// 0005515 // protein binding // inferred from electronic annotation /// 0005524 // ATP binding // inferred from electr…	chr6:32920964-32929601 (-) // 99.96 // p21.32 /// chr6_cox_hap1:4193841-4202478 (-) // 99.96 // /// chr6_qbl_hap2:3999040-4007677 (-) // 99.96 //
TAP2	6891	204769_s_at	-0.77795	-0.48359	0001916 // positive regulation of T cell mediated cytotoxicity // inferred from electronic annotation /// 0002237 // response to molecule of bacterial origin // inferred from electronic annotation /// 0002481 // antigen processing and presentation of exogenous protein antigen via MHC class Ib, TAP-dependent // inferred from electronic annotation /// 0006461 // protein complex assembly // non-trac…	0005624 // membrane fraction // traceable author statement /// 0005634 // nucleus // inferred from direct assay /// 0005783 // endoplasmic reticulum // inferred from electronic annotation /// 0005783 // endoplasmic reticulum // inferred from direct assay /// 0005788 // endoplasmic reticulum lumen // inferred from mutant phenotype /// 0005788 // endoplasmic reticulum lumen // inferred from sequenc…	0000166 // nucleotide binding // inferred from electronic annotation /// 0004409 // homoaconitate hydratase activity // non-traceable author statement /// 0005215 // transporter activity // inferred from direct assay /// 0005215 // transporter activity // inferred from electronic annotation /// 0005515 // protein binding // inferred from electronic annotation /// 0005515 // protein binding // inf…	chr6:32904275-32914499 (-) // 96.83 // p21.32 /// chr6_cox_hap1:4177153-4187376 (-) // 96.83 // /// chr6_qbl_hap2:3982350-3992576 (-) // 96.83 //
TAP2	6891	204770_at	-1.15659	-1.42423	0001916 // positive regulation of T cell mediated cytotoxicity // inferred from electronic annotation /// 0002237 // response to molecule of bacterial origin // inferred from electronic annotation /// 0002481 // antigen processing and presentation of exogenous protein antigen via MHC class Ib, TAP-dependent // inferred from electronic annotation /// 0006461 // protein complex assembly // non-trac…	0005624 // membrane fraction // traceable author statement /// 0005634 // nucleus // inferred from direct assay /// 0005783 // endoplasmic reticulum // inferred from electronic annotation /// 0005783 // endoplasmic reticulum // inferred from direct assay /// 0005788 // endoplasmic reticulum lumen // inferred from mutant phenotype /// 0005788 // endoplasmic reticulum lumen // inferred from sequenc…	0000166 // nucleotide binding // inferred from electronic annotation /// 0004409 // homoaconitate hydratase activity // non-traceable author statement /// 0005215 // transporter activity // inferred from direct assay /// 0005215 // transporter activity // inferred from electronic annotation /// 0005515 // protein binding // inferred from electronic annotation /// 0005515 // protein binding // inf…	chr6:32903109-32914499 (-) // 78.46 // p21.32 /// chr6_cox_hap1:4175987-4187376 (-) // 86.72 // /// chr6_qbl_hap2:3981184-3992576 (-) // 78.46 //
TAP2	6891	225973_at	-2.41594	-1.42204	0001916 // positive regulation of T cell mediated cytotoxicity // inferred from electronic annotation /// 0002237 // response to molecule of bacterial origin // inferred from electronic annotation /// 0002481 // antigen processing and presentation of exogenous protein antigen via MHC class Ib, TAP-dependent // inferred from electronic annotation /// 0006461 // protein complex assembly // non-trac…	0005624 // membrane fraction // traceable author statement /// 0005634 // nucleus // inferred from direct assay /// 0005783 // endoplasmic reticulum // inferred from electronic annotation /// 0005783 // endoplasmic reticulum // inferred from direct assay /// 0005788 // endoplasmic reticulum lumen // inferred from mutant phenotype /// 0005788 // endoplasmic reticulum lumen // inferred from sequenc…	0000166 // nucleotide binding // inferred from electronic annotation /// 0004409 // homoaconitate hydratase activity // non-traceable author statement /// 0005215 // transporter activity // inferred from direct assay /// 0005215 // transporter activity // inferred from electronic annotation /// 0005515 // protein binding // inferred from electronic annotation /// 0005515 // protein binding // inf…	chr6:32900871-32902728 (-) // 56.82 // p21.32 /// chr6_cox_hap1:4173749-4175606 (-) // 62.57 // /// chr6_qbl_hap2:3978946-3980803 (-) // 59.88 //
TP53	7157	201746_at	0.356225	-0.0132742	0000060 // protein import into nucleus, translocation // inferred from electronic annotation /// 0000122 // negative regulation of transcription from RNA polymerase II promoter // inferred from electronic annotation /// 0001701 // in utero embryonic development // inferred from electronic annotation /// 0001836 // release of cytochrome c from mitochondria // inferred from electronic annotation //…	0005626 // insoluble fraction // inferred from direct assay /// 0005634 // nucleus // inferred from direct assay /// 0005634 // nucleus // inferred from electronic annotation /// 0005654 // nucleoplasm // inferred from direct assay /// 0005657 // replication fork // inferred from electronic annotation /// 0005730 // nucleolus // inferred from direct assay /// 0005737 // cytoplasm // inferred from…	0000739 // DNA strand annealing activity // inferred from direct assay /// 0003677 // DNA binding // inferred from electronic annotation /// 0003677 // DNA binding // inferred from mutant phenotype /// 0003682 // chromatin binding // inferred from direct assay /// 0003700 // transcription factor activity // inferred from direct assay /// 0003700 // transcription factor activity // inferred from e…	chr17:7512463-7531642 (-) // 83.76 // p13.1
TP53	7157	211300_s_at	0.721403	0.930305	0000060 // protein import into nucleus, translocation // inferred from electronic annotation /// 0000122 // negative regulation of transcription from RNA polymerase II promoter // inferred from electronic annotation /// 0001701 // in utero embryonic development // inferred from electronic annotation /// 0001836 // release of cytochrome c from mitochondria // inferred from electronic annotation //…	0005626 // insoluble fraction // inferred from direct assay /// 0005634 // nucleus // inferred from direct assay /// 0005634 // nucleus // inferred from electronic annotation /// 0005654 // nucleoplasm // inferred from direct assay /// 0005657 // replication fork // inferred from electronic annotation /// 0005730 // nucleolus // inferred from direct assay /// 0005737 // cytoplasm // inferred from…	0000739 // DNA strand annealing activity // inferred from direct assay /// 0003677 // DNA binding // inferred from electronic annotation /// 0003677 // DNA binding // inferred from mutant phenotype /// 0003682 // chromatin binding // inferred from direct assay /// 0003700 // transcription factor activity // inferred from direct assay /// 0003700 // transcription factor activity // inferred from e…	chr17:7513288-7531530 (-) // 95.57 // p13.1
TXN	7295	208864_s_at	0.656516	0.708907	0006810 // transport // inferred from electronic annotation /// 0006928 // cell motion // traceable author statement /// 0007165 // signal transduction // traceable author statement /// 0007267 // cell-cell signaling // traceable author statement /// 0008283 // cell proliferation // traceable author statement /// 0022900 // electron transport chain // inferred from electronic annotation /// 00454…	0005737 // cytoplasm // inferred from electronic annotation /// 0005739 // mitochondrion // inferred from electronic annotation /// 0005829 // cytosol // not recorded	0005515 // protein binding // inferred from physical interaction	chr17:4422239-4422607 (+) // 92.72 // p13.2 /// chr10:121432587-121433280 (-) // 92.45 // q26.11 /// chr9:112046216-112058546 (-) // 98.38 // q31.3
TXN	7295	216609_at	1.10769	0.632706	0006810 // transport // inferred from electronic annotation /// 0006928 // cell motion // traceable author statement /// 0007165 // signal transduction // traceable author statement /// 0007267 // cell-cell signaling // traceable author statement /// 0008283 // cell proliferation // traceable author statement /// 0022900 // electron transport chain // inferred from electronic annotation /// 00454…	0005737 // cytoplasm // inferred from electronic annotation /// 0005739 // mitochondrion // inferred from electronic annotation /// 0005829 // cytosol // not recorded	0005515 // protein binding // inferred from physical interaction	chr10:121432629-121433267 (+) // 92.94 // q26.11 /// chr4:78099033-78099335 (+) // 90.2 // q21.1 /// chr9:112046258-112053565 (+) // 92.16 // q31.3 /// chr17:4422252-4422565 (-) // 92.94 // p13.2
TXN2	25828	209077_at	0.792671	0.764467	0006662 // glycerol ether metabolic process // inferred from electronic annotation /// 0006810 // transport // inferred from electronic annotation /// 0022900 // electron transport chain // inferred from electronic annotation /// 0045454 // cell redox homeostasis // inferred from electronic annotation	0005730 // nucleolus // inferred from direct assay /// 0005737 // cytoplasm // inferred from direct assay /// 0005739 // mitochondrion // inferred from electronic annotation /// 0005739 // mitochondrion // inferred from direct assay	0009055 // electron carrier activity // inferred from electronic annotation /// 0015035 // protein disulfide oxidoreductase activity // inferred from electronic annotation	chr22:35193033-35207903 (-) // 85.18 // q12.3
TXN2	25828	209078_s_at	1.02032	1.11646	0006662 // glycerol ether metabolic process // inferred from electronic annotation /// 0006810 // transport // inferred from electronic annotation /// 0022900 // electron transport chain // inferred from electronic annotation /// 0045454 // cell redox homeostasis // inferred from electronic annotation	0005730 // nucleolus // inferred from direct assay /// 0005737 // cytoplasm // inferred from direct assay /// 0005739 // mitochondrion // inferred from electronic annotation /// 0005739 // mitochondrion // inferred from direct assay	0009055 // electron carrier activity // inferred from electronic annotation /// 0015035 // protein disulfide oxidoreductase activity // inferred from electronic annotation	chr22:35193707-35206830 (-) // 99.83 // q12.3
UBE2I	7329	1558088_a_at	0.0300465	0.0117779	0006464 // protein modification process // traceable author statement /// 0006511 // ubiquitin-dependent protein catabolic process // traceable author statement /// 0007049 // cell cycle // inferred from electronic annotation /// 0007059 // chromosome segregation // inferred from electronic annotation /// 0007067 // mitosis // inferred from electronic annotation /// 0019941 // modification-depend…	0000795 // synaptonemal complex // traceable author statement /// 0005634 // nucleus // inferred from electronic annotation /// 0005634 // nucleus // inferred from direct assay /// 0016605 // PML body // inferred from direct assay	0005515 // protein binding // inferred from physical interaction /// 0005515 // protein binding // inferred from electronic annotation /// 0016566 // specific transcriptional repressor activity // inferred from direct assay /// 0016874 // ligase activity // inferred from electronic annotation /// 0019787 // small conjugating protein ligase activity // inferred from electronic annotation /// 00433…	chr16:1304019-1307127 (+) // 66.34 // p13.3
UBE2I	7329	208760_at	-0.863814	-0.687748	0006464 // protein modification process // traceable author statement /// 0006511 // ubiquitin-dependent protein catabolic process // traceable author statement /// 0007049 // cell cycle // inferred from electronic annotation /// 0007059 // chromosome segregation // inferred from electronic annotation /// 0007067 // mitosis // inferred from electronic annotation /// 0019941 // modification-depend…	0000795 // synaptonemal complex // traceable author statement /// 0005634 // nucleus // inferred from electronic annotation /// 0005634 // nucleus // inferred from direct assay /// 0016605 // PML body // inferred from direct assay	0005515 // protein binding // inferred from physical interaction /// 0005515 // protein binding // inferred from electronic annotation /// 0016566 // specific transcriptional repressor activity // inferred from direct assay /// 0016874 // ligase activity // inferred from electronic annotation /// 0019787 // small conjugating protein ligase activity // inferred from electronic annotation /// 00433…	chr16:1301872-1317019 (+) // 96.0 // p13.3
UBE2I	7329	213535_s_at	0.121283	0.0632047	0006464 // protein modification process // traceable author statement /// 0006511 // ubiquitin-dependent protein catabolic process // traceable author statement /// 0007049 // cell cycle // inferred from electronic annotation /// 0007059 // chromosome segregation // inferred from electronic annotation /// 0007067 // mitosis // inferred from electronic annotation /// 0019941 // modification-depend…	0000795 // synaptonemal complex // traceable author statement /// 0005634 // nucleus // inferred from electronic annotation /// 0005634 // nucleus // inferred from direct assay /// 0016605 // PML body // inferred from direct assay	0005515 // protein binding // inferred from physical interaction /// 0005515 // protein binding // inferred from electronic annotation /// 0016566 // specific transcriptional repressor activity // inferred from direct assay /// 0016874 // ligase activity // inferred from electronic annotation /// 0019787 // small conjugating protein ligase activity // inferred from electronic annotation /// 00433…	chr16:1304019-1315353 (+) // 98.49 // p13.3
UBE2I	7329	213536_s_at	0.767563	0.439786	0006464 // protein modification process // traceable author statement /// 0006511 // ubiquitin-dependent protein catabolic process // traceable author statement /// 0007049 // cell cycle // inferred from electronic annotation /// 0007059 // chromosome segregation // inferred from electronic annotation /// 0007067 // mitosis // inferred from electronic annotation /// 0019941 // modification-depend…	0000795 // synaptonemal complex // traceable author statement /// 0005634 // nucleus // inferred from electronic annotation /// 0005634 // nucleus // inferred from direct assay /// 0016605 // PML body // inferred from direct assay	0005515 // protein binding // inferred from physical interaction /// 0005515 // protein binding // inferred from electronic annotation /// 0016566 // specific transcriptional repressor activity // inferred from direct assay /// 0016874 // ligase activity // inferred from electronic annotation /// 0019787 // small conjugating protein ligase activity // inferred from electronic annotation /// 00433…	chr16:1304019-1315353 (-) // 98.49 // p13.3
UBE2I	7329	233360_at	-0.211999	0.0299421	0006464 // protein modification process // traceable author statement /// 0006511 // ubiquitin-dependent protein catabolic process // traceable author statement /// 0007049 // cell cycle // inferred from electronic annotation /// 0007059 // chromosome segregation // inferred from electronic annotation /// 0007067 // mitosis // inferred from electronic annotation /// 0019941 // modification-depend…	0000795 // synaptonemal complex // traceable author statement /// 0005634 // nucleus // inferred from electronic annotation /// 0005634 // nucleus // inferred from direct assay /// 0016605 // PML body // inferred from direct assay	0005515 // protein binding // inferred from physical interaction /// 0005515 // protein binding // inferred from electronic annotation /// 0016566 // specific transcriptional repressor activity // inferred from direct assay /// 0016874 // ligase activity // inferred from electronic annotation /// 0019787 // small conjugating protein ligase activity // inferred from electronic annotation /// 00433…	chr16:1309256-1312415 (+) // 75.23 // p13.3
UBE3A	7337	211285_s_at	-1.01203	-0.873042	0006464 // protein modification process // inferred from electronic annotation /// 0006508 // proteolysis // traceable author statement /// 0006511 // ubiquitin-dependent protein catabolic process // traceable author statement /// 0006511 // ubiquitin-dependent protein catabolic process // inferred from electronic annotation /// 0007420 // brain development // traceable author statement /// 00199…	0005622 // intracellular // inferred from electronic annotation /// 0005634 // nucleus // inferred from electronic annotation /// 0005829 // cytosol // inferred from electronic annotation /// 0043234 // protein complex // inferred from electronic annotation	0004842 // ubiquitin-protein ligase activity // inferred from electronic annotation /// 0005515 // protein binding // inferred from physical interaction /// 0005515 // protein binding // inferred from electronic annotation /// 0016874 // ligase activity // inferred from electronic annotation /// 0016881 // acid-amino acid ligase activity // inferred from electronic annotation	chr15:23135353-23208213 (-) // 97.05 // q11.2
UBE3A	7337	211575_s_at	-0.716517	-0.776271	0006464 // protein modification process // inferred from electronic annotation /// 0006508 // proteolysis // traceable author statement /// 0006511 // ubiquitin-dependent protein catabolic process // traceable author statement /// 0006511 // ubiquitin-dependent protein catabolic process // inferred from electronic annotation /// 0007420 // brain development // traceable author statement /// 00199…	0005622 // intracellular // inferred from electronic annotation /// 0005634 // nucleus // inferred from electronic annotation /// 0005829 // cytosol // inferred from electronic annotation /// 0043234 // protein complex // inferred from electronic annotation	0004842 // ubiquitin-protein ligase activity // inferred from electronic annotation /// 0005515 // protein binding // inferred from physical interaction /// 0005515 // protein binding // inferred from electronic annotation /// 0016874 // ligase activity // inferred from electronic annotation /// 0016881 // acid-amino acid ligase activity // inferred from electronic annotation	chr2:218798884-218822876 (+) // 58.48 // q35
UBE3A	7337	213128_s_at	-0.651451	-0.641593	0006464 // protein modification process // inferred from electronic annotation /// 0006508 // proteolysis // traceable author statement /// 0006511 // ubiquitin-dependent protein catabolic process // traceable author statement /// 0006511 // ubiquitin-dependent protein catabolic process // inferred from electronic annotation /// 0007420 // brain development // traceable author statement /// 00199…	0005622 // intracellular // inferred from electronic annotation /// 0005634 // nucleus // inferred from electronic annotation /// 0005829 // cytosol // inferred from electronic annotation /// 0043234 // protein complex // inferred from electronic annotation	0004842 // ubiquitin-protein ligase activity // inferred from electronic annotation /// 0005515 // protein binding // inferred from physical interaction /// 0005515 // protein binding // inferred from electronic annotation /// 0016874 // ligase activity // inferred from electronic annotation /// 0016881 // acid-amino acid ligase activity // inferred from electronic annotation	chr15:23133424-23134876 (-) // 93.46 // q11.2
UBE3A	7337	213291_s_at	-0.681149	-0.570782	0006464 // protein modification process // inferred from electronic annotation /// 0006508 // proteolysis // traceable author statement /// 0006511 // ubiquitin-dependent protein catabolic process // traceable author statement /// 0006511 // ubiquitin-dependent protein catabolic process // inferred from electronic annotation /// 0007420 // brain development // traceable author statement /// 00199…	0005622 // intracellular // inferred from electronic annotation /// 0005634 // nucleus // inferred from electronic annotation /// 0005829 // cytosol // inferred from electronic annotation /// 0043234 // protein complex // inferred from electronic annotation	0004842 // ubiquitin-protein ligase activity // inferred from electronic annotation /// 0005515 // protein binding // inferred from physical interaction /// 0005515 // protein binding // inferred from electronic annotation /// 0016874 // ligase activity // inferred from electronic annotation /// 0016881 // acid-amino acid ligase activity // inferred from electronic annotation	chr15:23133486-23134774 (-) // 94.57 // q11.2
UBQLN1	29979	222989_s_at	0.535236	0.389844	0001666 // response to hypoxia // inferred from mutant phenotype /// 0006464 // protein modification process // inferred from electronic annotation /// 0031396 // regulation of protein ubiquitination // inferred from direct assay	0005634 // nucleus // inferred from electronic annotation /// 0005737 // cytoplasm // inferred from direct assay /// 0005737 // cytoplasm // inferred from mutant phenotype /// 0005737 // cytoplasm // inferred from electronic annotation /// 0005783 // endoplasmic reticulum // inferred from direct assay /// 0005829 // cytosol // inferred from electronic annotation /// 0043234 // protein complex // …	0005515 // protein binding // inferred from physical interaction /// 0019900 // kinase binding // inferred from physical interaction	chr9:85464702-85512752 (-) // 99.17 // q21.32
UBQLN1	29979	222990_at	-0.508036	-0.295353	0001666 // response to hypoxia // inferred from mutant phenotype /// 0006464 // protein modification process // inferred from electronic annotation /// 0031396 // regulation of protein ubiquitination // inferred from direct assay	0005634 // nucleus // inferred from electronic annotation /// 0005737 // cytoplasm // inferred from direct assay /// 0005737 // cytoplasm // inferred from mutant phenotype /// 0005737 // cytoplasm // inferred from electronic annotation /// 0005783 // endoplasmic reticulum // inferred from direct assay /// 0005829 // cytosol // inferred from electronic annotation /// 0043234 // protein complex // …	0005515 // protein binding // inferred from physical interaction /// 0019900 // kinase binding // inferred from physical interaction	chr9:85464702-85512752 (-) // 99.17 // q21.32
UBQLN1	29979	222991_s_at	0.319234	0.151891	0001666 // response to hypoxia // inferred from mutant phenotype /// 0006464 // protein modification process // inferred from electronic annotation /// 0031396 // regulation of protein ubiquitination // inferred from direct assay	0005634 // nucleus // inferred from electronic annotation /// 0005737 // cytoplasm // inferred from direct assay /// 0005737 // cytoplasm // inferred from mutant phenotype /// 0005737 // cytoplasm // inferred from electronic annotation /// 0005783 // endoplasmic reticulum // inferred from direct assay /// 0005829 // cytosol // inferred from electronic annotation /// 0043234 // protein complex // …	0005515 // protein binding // inferred from physical interaction /// 0019900 // kinase binding // inferred from physical interaction	chr9:85465612-85512692 (-) // 99.23 // q21.32
UBQLN2	29978	215884_s_at	0.285352	0.152392	0006464 // protein modification process // inferred from electronic annotation	0005634 // nucleus // inferred from electronic annotation /// 0005737 // cytoplasm // inferred from electronic annotation /// 0005737 // cytoplasm // inferred from direct assay /// 0005886 // plasma membrane // inferred from direct assay	0005488 // binding // inferred from electronic annotation	chrX:56607964-56610077 (+) // 92.93 // p11.1
UCHL5	51377	219960_s_at	0.840677	0.560892	0006511 // ubiquitin-dependent protein catabolic process // inferred from electronic annotation /// 0019941 // modification-dependent protein catabolic process // inferred from electronic annotation	0005622 // intracellular // inferred from electronic annotation /// 0005829 // cytosol // inferred from electronic annotation /// 0043234 // protein complex // inferred from electronic annotation	0004221 // ubiquitin thiolesterase activity // inferred from electronic annotation /// 0005515 // protein binding // inferred from physical interaction /// 0008233 // peptidase activity // inferred from electronic annotation /// 0008234 // cysteine-type peptidase activity // inferred from electronic annotation /// 0016787 // hydrolase activity // inferred from electronic annotation	chr1:191251522-191295144 (-) // 98.38 // q31.2
UCHL5	51377	220083_x_at	1.01882	0.785532	0006511 // ubiquitin-dependent protein catabolic process // inferred from electronic annotation /// 0019941 // modification-dependent protein catabolic process // inferred from electronic annotation	0005622 // intracellular // inferred from electronic annotation /// 0005829 // cytosol // inferred from electronic annotation /// 0043234 // protein complex // inferred from electronic annotation	0004221 // ubiquitin thiolesterase activity // inferred from electronic annotation /// 0005515 // protein binding // inferred from physical interaction /// 0008233 // peptidase activity // inferred from electronic annotation /// 0008234 // cysteine-type peptidase activity // inferred from electronic annotation /// 0016787 // hydrolase activity // inferred from electronic annotation	chr1:191254357-191295027 (-) // 99.74 // q31.2
VEGFA	7422	210512_s_at	-3.11024	-2.66831	0001525 // angiogenesis // inferred from direct assay /// 0001525 // angiogenesis // inferred from electronic annotation /// 0001541 // ovarian follicle development // inferred from electronic annotation /// 0001568 // blood vessel development // inferred from electronic annotation /// 0001569 // patterning of blood vessels // inferred from electronic annotation /// 0001570 // vasculogenesis // t…	0005576 // extracellular region // not recorded /// 0005576 // extracellular region // inferred from electronic annotation /// 0005578 // proteinaceous extracellular matrix // non-traceable author statement /// 0005604 // basement membrane // inferred from electronic annotation /// 0005615 // extracellular space // inferred from direct assay /// 0005615 // extracellular space // inferred from ele…	0001968 // fibronectin binding // inferred from direct assay /// 0005125 // cytokine activity // inferred from sequence or structural similarity /// 0005161 // platelet-derived growth factor receptor binding // inferred from physical interaction /// 0005515 // protein binding // inferred from electronic annotation /// 0005515 // protein binding // inferred from physical interaction /// 0008083 //…	chr6:43846253-43862154 (+) // 91.54 // p21.1
VEGFA	7422	210513_s_at	-3.3244	-3.02505	0001525 // angiogenesis // inferred from direct assay /// 0001525 // angiogenesis // inferred from electronic annotation /// 0001541 // ovarian follicle development // inferred from electronic annotation /// 0001568 // blood vessel development // inferred from electronic annotation /// 0001569 // patterning of blood vessels // inferred from electronic annotation /// 0001570 // vasculogenesis // t…	0005576 // extracellular region // not recorded /// 0005576 // extracellular region // inferred from electronic annotation /// 0005578 // proteinaceous extracellular matrix // non-traceable author statement /// 0005604 // basement membrane // inferred from electronic annotation /// 0005615 // extracellular space // inferred from direct assay /// 0005615 // extracellular space // inferred from ele…	0001968 // fibronectin binding // inferred from direct assay /// 0005125 // cytokine activity // inferred from sequence or structural similarity /// 0005161 // platelet-derived growth factor receptor binding // inferred from physical interaction /// 0005515 // protein binding // inferred from electronic annotation /// 0005515 // protein binding // inferred from physical interaction /// 0008083 //…	chr6:43846961-43857767 (+) // 95.93 // p21.1
VEGFA	7422	211527_x_at	-3.12248	-3.0969	0001525 // angiogenesis // inferred from direct assay /// 0001525 // angiogenesis // inferred from electronic annotation /// 0001541 // ovarian follicle development // inferred from electronic annotation /// 0001568 // blood vessel development // inferred from electronic annotation /// 0001569 // patterning of blood vessels // inferred from electronic annotation /// 0001570 // vasculogenesis // t…	0005576 // extracellular region // not recorded /// 0005576 // extracellular region // inferred from electronic annotation /// 0005578 // proteinaceous extracellular matrix // non-traceable author statement /// 0005604 // basement membrane // inferred from electronic annotation /// 0005615 // extracellular space // inferred from direct assay /// 0005615 // extracellular space // inferred from ele…	0001968 // fibronectin binding // inferred from direct assay /// 0005125 // cytokine activity // inferred from sequence or structural similarity /// 0005161 // platelet-derived growth factor receptor binding // inferred from physical interaction /// 0005515 // protein binding // inferred from electronic annotation /// 0005515 // protein binding // inferred from physical interaction /// 0008083 //…	chr6:43846797-43860664 (+) // 96.23 // p21.1
VEGFA	7422	212171_x_at	-3.37987	-2.90224	0001525 // angiogenesis // inferred from direct assay /// 0001525 // angiogenesis // inferred from electronic annotation /// 0001541 // ovarian follicle development // inferred from electronic annotation /// 0001568 // blood vessel development // inferred from electronic annotation /// 0001569 // patterning of blood vessels // inferred from electronic annotation /// 0001570 // vasculogenesis // t…	0005576 // extracellular region // not recorded /// 0005576 // extracellular region // inferred from electronic annotation /// 0005578 // proteinaceous extracellular matrix // non-traceable author statement /// 0005604 // basement membrane // inferred from electronic annotation /// 0005615 // extracellular space // inferred from direct assay /// 0005615 // extracellular space // inferred from ele…	0001968 // fibronectin binding // inferred from direct assay /// 0005125 // cytokine activity // inferred from sequence or structural similarity /// 0005161 // platelet-derived growth factor receptor binding // inferred from physical interaction /// 0005515 // protein binding // inferred from electronic annotation /// 0005515 // protein binding // inferred from physical interaction /// 0008083 //…	chr6:43845923-43862202 (+) // 91.25 // p21.1
XBP1	7494	200670_at	-1.34505	-1.27669	0006350 // transcription // inferred from electronic annotation /// 0006355 // regulation of transcription, DNA-dependent // inferred from electronic annotation /// 0006955 // immune response // traceable author statement /// 0045449 // regulation of transcription // inferred from electronic annotation	0005634 // nucleus // inferred from electronic annotation /// 0005634 // nucleus // inferred from direct assay	0003677 // DNA binding // inferred from electronic annotation /// 0003677 // DNA binding // traceable author statement /// 0003700 // transcription factor activity // traceable author statement /// 0003700 // transcription factor activity // inferred from electronic annotation /// 0043565 // sequence-specific DNA binding // inferred from electronic annotation /// 0046983 // protein dimerization a…	chr22:27520547-27526524 (-) // 97.63 // q12.1
