# Supplementary material for: Molecular Mechanisms of Bortezomib Resistant Adenocarcinoma Cells
Source: PLoS One. 2011 Dec 22;6(12):e27996. doi: 10.1371/journal.pone.0027996 (PMC3245226; doi:10.1371/journal.pone.0027996)
Supplement: Table S3 — Genes Deleted in BR100 with a Two Fold or Greater Gene Expression Change. (XLSX) [file pone.0027996.s008.xlsx]

## Sheet: Table S3
Table S3 - Genes Deleted in BR100 with a Two Fold or Greater Gene Expression Change
Gene Symbol	Entrez Gene	Probe	gene expBR100 Fold Change (Log2)	Gene Ontology Biological Process	Gene Ontology Cellular Component	Gene Ontology Molecular Function	Alignments
DNAJC19	131118	225358_at	-1.32904	0006457 // protein folding // non-traceable author statement /// 0006810 // transport // inferred from electronic annotation /// 0007601 // visual perception // inferred from mutant phenotype /// 0015031 // protein transport // inferred from electronic annotation /// 0048806 // genitalia development // inferred from mutant phenotype /// 0065002 // intracellular protein transmembrane transport // …	0005739 // mitochondrion // inferred from direct assay /// 0005739 // mitochondrion // inferred from electronic annotation /// 0005743 // mitochondrial inner membrane // inferred from electronic annotation /// 0016020 // membrane // inferred from electronic annotation /// 0016021 // integral to membrane // non-traceable author statement /// 0016021 // integral to membrane // inferred from electro…	0031072 // heat shock protein binding // inferred from electronic annotation	chr14:44828885-44829432 (+) // 35.61 // q21.3 /// chr3:182184190-182190255 (-) // 87.45 // q26.33
PIK3CA	5290	235980_at	-1.93636	0006006 // glucose metabolic process // inferred from electronic annotation /// 0006468 // protein amino acid phosphorylation // inferred from electronic annotation /// 0006916 // anti-apoptosis // inferred from electronic annotation /// 0007165 // signal transduction // inferred from electronic annotation /// 0040014 // regulation of multicellular organism growth // inferred from electronic anno…	0005737 // cytoplasm // inferred from direct assay /// 0005739 // mitochondrion // inferred from direct assay /// 0005829 // cytosol // not recorded /// 0005942 // phosphoinositide 3-kinase complex // inferred from electronic annotation /// 0030027 // lamellipodium // inferred from electronic annotation	0004428 // inositol or phosphatidylinositol kinase activity // inferred from electronic annotation /// 0016303 // 1-phosphatidylinositol-3-kinase activity // inferred from direct assay /// 0016740 // transferase activity // inferred from electronic annotation /// 0016773 // phosphotransferase activity, alcohol group as acceptor // inferred from electronic annotation /// 0043560 // insulin recepto…	chr22:15437837-15438527 (+) // 94.4 // q11.1 /// chr3:180439418-180440110 (+) // 90.34 // q26.32
ACAD11	84129	225573_at	-1.45153	0008152 // metabolic process // inferred from electronic annotation /// 0045494 // photoreceptor cell maintenance // inferred from mutant phenotype /// 0048496 // maintenance of organ identity // inferred from mutant phenotype	0005634 // nucleus // inferred from direct assay /// 0005730 // nucleolus // inferred from direct assay /// 0005737 // cytoplasm // inferred from direct assay /// 0005777 // peroxisome // inferred from sequence or structural similarity /// 0005871 // kinesin complex // inferred from electronic annotation	0003777 // microtubule motor activity // inferred from electronic annotation /// 0003995 // acyl-CoA dehydrogenase activity // inferred from electronic annotation /// 0005488 // binding // inferred from electronic annotation /// 0005515 // protein binding // inferred from physical interaction /// 0009055 // electron carrier activity // inferred from electronic annotation /// 0016491 // oxidoreduc…	chr3:133759675-133861852 (-) // 89.57 // q22.1
NPHP3	27031	235410_at	-1.70126	0008152 // metabolic process // inferred from electronic annotation /// 0045494 // photoreceptor cell maintenance // inferred from mutant phenotype /// 0048496 // maintenance of organ identity // inferred from mutant phenotype	0005634 // nucleus // inferred from direct assay /// 0005730 // nucleolus // inferred from direct assay /// 0005737 // cytoplasm // inferred from direct assay /// 0005777 // peroxisome // inferred from sequence or structural similarity /// 0005871 // kinesin complex // inferred from electronic annotation	0003777 // microtubule motor activity // inferred from electronic annotation /// 0003995 // acyl-CoA dehydrogenase activity // inferred from electronic annotation /// 0005488 // binding // inferred from electronic annotation /// 0005515 // protein binding // inferred from physical interaction /// 0009055 // electron carrier activity // inferred from electronic annotation /// 0016491 // oxidoreduc…	chr3:133882142-133882697 (-) // 94.23 // q22.1
NPHP3	27031	235432_at	-1.31917	0008152 // metabolic process // inferred from electronic annotation /// 0045494 // photoreceptor cell maintenance // inferred from mutant phenotype /// 0048496 // maintenance of organ identity // inferred from mutant phenotype	0005634 // nucleus // inferred from direct assay /// 0005730 // nucleolus // inferred from direct assay /// 0005737 // cytoplasm // inferred from direct assay /// 0005777 // peroxisome // inferred from sequence or structural similarity /// 0005871 // kinesin complex // inferred from electronic annotation	0003777 // microtubule motor activity // inferred from electronic annotation /// 0003995 // acyl-CoA dehydrogenase activity // inferred from electronic annotation /// 0005488 // binding // inferred from electronic annotation /// 0005515 // protein binding // inferred from physical interaction /// 0009055 // electron carrier activity // inferred from electronic annotation /// 0016491 // oxidoreduc…	chr3:133882815-133884353 (-) // 64.84 // q22.1
SRPRB	58477	222532_at	-1.1394		0005783 // endoplasmic reticulum // inferred from electronic annotation /// 0005789 // endoplasmic reticulum membrane // inferred from electronic annotation /// 0016020 // membrane // inferred from electronic annotation /// 0016021 // integral to membrane // inferred from electronic annotation /// 0030529 // ribonucleoprotein complex // inferred from electronic annotation	0000166 // nucleotide binding // inferred from electronic annotation /// 0004872 // receptor activity // inferred from electronic annotation /// 0005515 // protein binding // inferred from physical interaction /// 0005525 // GTP binding // inferred from electronic annotation	chr3:135007345-135022219 (+) // 93.02 // q22.1
SRPRB	58477	218140_x_at	-1.47705		0005783 // endoplasmic reticulum // inferred from electronic annotation /// 0005789 // endoplasmic reticulum membrane // inferred from electronic annotation /// 0016020 // membrane // inferred from electronic annotation /// 0016021 // integral to membrane // inferred from electronic annotation /// 0030529 // ribonucleoprotein complex // inferred from electronic annotation	0000166 // nucleotide binding // inferred from electronic annotation /// 0004872 // receptor activity // inferred from electronic annotation /// 0005515 // protein binding // inferred from physical interaction /// 0005525 // GTP binding // inferred from electronic annotation	chr3:135021605-135022201 (+) // 90.0 // q22.1
SRPRB	58477	227737_at	-2.3539		0005783 // endoplasmic reticulum // inferred from electronic annotation /// 0005789 // endoplasmic reticulum membrane // inferred from electronic annotation /// 0016020 // membrane // inferred from electronic annotation /// 0016021 // integral to membrane // inferred from electronic annotation /// 0030529 // ribonucleoprotein complex // inferred from electronic annotation	0000166 // nucleotide binding // inferred from electronic annotation /// 0004872 // receptor activity // inferred from electronic annotation /// 0005515 // protein binding // inferred from physical interaction /// 0005525 // GTP binding // inferred from electronic annotation	chr3:135021649-135023025 (+) // 95.44 // q22.1
AMOTL2	51421	203002_at	-2.42537		0005923 // tight junction // inferred from electronic annotation	0005515 // protein binding // inferred from electronic annotation /// 0042802 // identical protein binding // inferred from electronic annotation	chr3:135557412-135572337 (-) // 99.04 // q22.1
TMEM22	80723	219569_s_at	-1.85178		0005794 // Golgi apparatus // inferred from direct assay /// 0016020 // membrane // inferred from electronic annotation /// 0016021 // integral to membrane // inferred from electronic annotation		chr3:138020667-138057419 (+) // 98.52 // q22.3
IL20RB	53833	228575_at	-6.43112		0016020 // membrane // inferred from electronic annotation /// 0016021 // integral to membrane // inferred from electronic annotation	0004872 // receptor activity // inferred from electronic annotation	chr3:138193554-138212611 (+) // 86.03 // q22.3
ARMC8	25852	203486_s_at	-1.06667			0005488 // binding // inferred from electronic annotation	chr3:139464981-139499916 (+) // 98.58 // q22.3
ARMC8	25852	203487_s_at	-1.26736			0005488 // binding // inferred from electronic annotation	chr3:139465042-139499904 (+) // 98.8 // q22.3
PIK3CB	5291	212688_at	-1.09623	0000187 // activation of MAPK activity // traceable author statement /// 0001952 // regulation of cell-matrix adhesion // inferred from electronic annotation /// 0006874 // cellular calcium ion homeostasis // inferred from electronic annotation /// 0006935 // chemotaxis // traceable author statement /// 0007156 // homophilic cell adhesion // inferred from electronic annotation /// 0007165 // sign…	0005829 // cytosol // not recorded /// 0005942 // phosphoinositide 3-kinase complex // inferred from electronic annotation	0004428 // inositol or phosphatidylinositol kinase activity // inferred from electronic annotation /// 0005488 // binding // inferred from electronic annotation /// 0016301 // kinase activity // inferred from electronic annotation /// 0016303 // 1-phosphatidylinositol-3-kinase activity // traceable author statement /// 0016303 // 1-phosphatidylinositol-3-kinase activity // inferred from electroni…	chr3:139855551-139998099 (-) // 98.52 // q22.3
SLC25A36	55186	201917_s_at	-2.84418	0006810 // transport // inferred from electronic annotation /// 0032355 // response to estradiol stimulus // inferred from direct assay	0005739 // mitochondrion // inferred from electronic annotation /// 0005743 // mitochondrial inner membrane // inferred from electronic annotation /// 0016020 // membrane // inferred from electronic annotation /// 0016021 // integral to membrane // inferred from electronic annotation	0005215 // transporter activity // inferred from electronic annotation /// 0005488 // binding // inferred from electronic annotation	chr3:142143350-142181473 (+) // 98.51 // q23
SLC25A36	55186	201918_at	-2.50712	0006810 // transport // inferred from electronic annotation /// 0032355 // response to estradiol stimulus // inferred from direct assay	0005739 // mitochondrion // inferred from electronic annotation /// 0005743 // mitochondrial inner membrane // inferred from electronic annotation /// 0016020 // membrane // inferred from electronic annotation /// 0016021 // integral to membrane // inferred from electronic annotation	0005215 // transporter activity // inferred from electronic annotation /// 0005488 // binding // inferred from electronic annotation	chr3:142143350-142181473 (+) // 98.51 // q23
SLC25A36	55186	201919_at	-2.62527	0006810 // transport // inferred from electronic annotation /// 0032355 // response to estradiol stimulus // inferred from direct assay	0005739 // mitochondrion // inferred from electronic annotation /// 0005743 // mitochondrial inner membrane // inferred from electronic annotation /// 0016020 // membrane // inferred from electronic annotation /// 0016021 // integral to membrane // inferred from electronic annotation	0005215 // transporter activity // inferred from electronic annotation /// 0005488 // binding // inferred from electronic annotation	chr3:142143350-142181473 (+) // 98.51 // q23
SLC25A36	55186	237741_at	-3.59472	0006810 // transport // inferred from electronic annotation /// 0032355 // response to estradiol stimulus // inferred from direct assay	0005739 // mitochondrion // inferred from electronic annotation /// 0005743 // mitochondrial inner membrane // inferred from electronic annotation /// 0016020 // membrane // inferred from electronic annotation /// 0016021 // integral to membrane // inferred from electronic annotation	0005215 // transporter activity // inferred from electronic annotation /// 0005488 // binding // inferred from electronic annotation	chr3:142169841-142170305 (+) // 91.54 // q23
ACPL2	92370	226925_at	-1.86792		0005576 // extracellular region // inferred from electronic annotation	0003993 // acid phosphatase activity // inferred from electronic annotation /// 0016787 // hydrolase activity // inferred from electronic annotation	chr3:142488922-142496174 (+) // 87.53 // q23
ZBTB38	253461	219221_at	-1.77543	0006350 // transcription // inferred from electronic annotation /// 0006355 // regulation of transcription, DNA-dependent // inferred from electronic annotation /// 0045944 // positive regulation of transcription from RNA polymerase II promoter // inferred from sequence or structural similarity /// 0045944 // positive regulation of transcription from RNA polymerase II promoter // inferred from el…	0005622 // intracellular // inferred from electronic annotation /// 0005634 // nucleus // inferred from sequence or structural similarity /// 0005634 // nucleus // inferred from electronic annotation	0003676 // nucleic acid binding // inferred from electronic annotation /// 0003677 // DNA binding // inferred from electronic annotation /// 0003700 // transcription factor activity // inferred from sequence or structural similarity /// 0003700 // transcription factor activity // inferred from electronic annotation /// 0005515 // protein binding // inferred from electronic annotation /// 0008270 …	chr3:142646252-142647615 (+) // 98.77 // q23
ZBTB38	253461	225512_at	-1.50698	0006350 // transcription // inferred from electronic annotation /// 0006355 // regulation of transcription, DNA-dependent // inferred from electronic annotation /// 0045944 // positive regulation of transcription from RNA polymerase II promoter // inferred from sequence or structural similarity /// 0045944 // positive regulation of transcription from RNA polymerase II promoter // inferred from el…	0005622 // intracellular // inferred from electronic annotation /// 0005634 // nucleus // inferred from sequence or structural similarity /// 0005634 // nucleus // inferred from electronic annotation	0003676 // nucleic acid binding // inferred from electronic annotation /// 0003677 // DNA binding // inferred from electronic annotation /// 0003700 // transcription factor activity // inferred from sequence or structural similarity /// 0003700 // transcription factor activity // inferred from electronic annotation /// 0005515 // protein binding // inferred from electronic annotation /// 0008270 …	chr3:142648027-142650440 (+) // 99.14 // q23
TFDP2	7029	226157_at	-2.551	0006350 // transcription // inferred from electronic annotation /// 0006355 // regulation of transcription, DNA-dependent // inferred from electronic annotation /// 0007049 // cell cycle // inferred from electronic annotation	0005634 // nucleus // inferred from electronic annotation /// 0005667 // transcription factor complex // inferred from electronic annotation	0003677 // DNA binding // inferred from electronic annotation /// 0003677 // DNA binding // traceable author statement /// 0003700 // transcription factor activity // non-traceable author statement /// 0003700 // transcription factor activity // inferred from electronic annotation /// 0003712 // transcription cofactor activity // traceable author statement	chr3:143145959-143148978 (-) // 75.94 // q23
TFDP2	7029	203589_s_at	-1.11206	0006350 // transcription // inferred from electronic annotation /// 0006355 // regulation of transcription, DNA-dependent // inferred from electronic annotation /// 0007049 // cell cycle // inferred from electronic annotation	0005634 // nucleus // inferred from electronic annotation /// 0005667 // transcription factor complex // inferred from electronic annotation	0003677 // DNA binding // inferred from electronic annotation /// 0003677 // DNA binding // traceable author statement /// 0003700 // transcription factor activity // non-traceable author statement /// 0003700 // transcription factor activity // inferred from electronic annotation /// 0003712 // transcription cofactor activity // traceable author statement	chr3:143153033-143230140 (-) // 98.71 // q23
XRN1	54464	225814_at	-1.89458	0006139 // nucleobase, nucleoside, nucleotide and nucleic acid metabolic process // inferred from electronic annotation /// 0007049 // cell cycle // inferred from electronic annotation /// 0045786 // negative regulation of cell cycle // inferred from electronic annotation	0005622 // intracellular // inferred from electronic annotation /// 0005737 // cytoplasm // inferred from electronic annotation	0003676 // nucleic acid binding // inferred from electronic annotation /// 0003677 // DNA binding // inferred from electronic annotation /// 0003723 // RNA binding // inferred from electronic annotation /// 0004518 // nuclease activity // inferred from electronic annotation /// 0004527 // exonuclease activity // inferred from electronic annotation /// 0005515 // protein binding // inferred from p…	chr3:143508141-143622590 (-) // 96.52 // q23
XRN1	54464	233632_s_at	-1.87789	0006139 // nucleobase, nucleoside, nucleotide and nucleic acid metabolic process // inferred from electronic annotation /// 0007049 // cell cycle // inferred from electronic annotation /// 0045786 // negative regulation of cell cycle // inferred from electronic annotation	0005622 // intracellular // inferred from electronic annotation /// 0005737 // cytoplasm // inferred from electronic annotation	0003676 // nucleic acid binding // inferred from electronic annotation /// 0003677 // DNA binding // inferred from electronic annotation /// 0003723 // RNA binding // inferred from electronic annotation /// 0004518 // nuclease activity // inferred from electronic annotation /// 0004527 // exonuclease activity // inferred from electronic annotation /// 0005515 // protein binding // inferred from p…	chr3:143508322-143511817 (-) // 93.16 // q23
SLC33A1	9197	203164_at	-2.38719	0006810 // transport // traceable author statement /// 0006810 // transport // inferred from electronic annotation /// 0008219 // cell death // inferred from electronic annotation	0005624 // membrane fraction // traceable author statement /// 0005783 // endoplasmic reticulum // inferred from electronic annotation /// 0005789 // endoplasmic reticulum membrane // traceable author statement /// 0005789 // endoplasmic reticulum membrane // inferred from electronic annotation /// 0005887 // integral to plasma membrane // traceable author statement /// 0016020 // membrane // inf…	0008521 // acetyl-CoA transporter activity // traceable author statement	chr3:157027002-157054912 (-) // 99.53 // q25.31
SLC33A1	9197	1554148_a_at	-2.16863	0006810 // transport // traceable author statement /// 0006810 // transport // inferred from electronic annotation /// 0008219 // cell death // inferred from electronic annotation	0005624 // membrane fraction // traceable author statement /// 0005783 // endoplasmic reticulum // inferred from electronic annotation /// 0005789 // endoplasmic reticulum membrane // traceable author statement /// 0005789 // endoplasmic reticulum membrane // inferred from electronic annotation /// 0005887 // integral to plasma membrane // traceable author statement /// 0016020 // membrane // inf…	0008521 // acetyl-CoA transporter activity // traceable author statement	chr3:157027010-157055071 (-) // 98.31 // q25.31
SLC33A1	9197	203165_s_at	-2.19436	0006810 // transport // traceable author statement /// 0006810 // transport // inferred from electronic annotation /// 0008219 // cell death // inferred from electronic annotation	0005624 // membrane fraction // traceable author statement /// 0005783 // endoplasmic reticulum // inferred from electronic annotation /// 0005789 // endoplasmic reticulum membrane // traceable author statement /// 0005789 // endoplasmic reticulum membrane // inferred from electronic annotation /// 0005887 // integral to plasma membrane // traceable author statement /// 0016020 // membrane // inf…	0008521 // acetyl-CoA transporter activity // traceable author statement	chr3:157028064-157054861 (-) // 99.96 // q25.31
SSR3	6747	222412_s_at	-1.80868	0006613 // cotranslational protein targeting to membrane // inferred from electronic annotation	0005783 // endoplasmic reticulum // inferred from electronic annotation /// 0005784 // translocon complex // inferred from electronic annotation /// 0005789 // endoplasmic reticulum membrane // inferred from electronic annotation /// 0005792 // microsome // traceable author statement /// 0016020 // membrane // inferred from electronic annotation /// 0016021 // integral to membrane // inferred fro…	0004872 // receptor activity // inferred from electronic annotation /// 0005048 // signal sequence binding // traceable author statement /// 0005515 // protein binding // inferred from physical interaction	chr3:157741002-157755640 (-) // 84.93 // q25.31
SSR3	6747	217790_s_at	-1.7996	0006613 // cotranslational protein targeting to membrane // inferred from electronic annotation	0005783 // endoplasmic reticulum // inferred from electronic annotation /// 0005784 // translocon complex // inferred from electronic annotation /// 0005789 // endoplasmic reticulum membrane // inferred from electronic annotation /// 0005792 // microsome // traceable author statement /// 0016020 // membrane // inferred from electronic annotation /// 0016021 // integral to membrane // inferred fro…	0004872 // receptor activity // inferred from electronic annotation /// 0005048 // signal sequence binding // traceable author statement /// 0005515 // protein binding // inferred from physical interaction	chr3:157741238-157755629 (-) // 92.13 // q25.31
SSR3	6747	237817_at	-1.22239	0006613 // cotranslational protein targeting to membrane // inferred from electronic annotation	0005783 // endoplasmic reticulum // inferred from electronic annotation /// 0005784 // translocon complex // inferred from electronic annotation /// 0005789 // endoplasmic reticulum membrane // inferred from electronic annotation /// 0005792 // microsome // traceable author statement /// 0016020 // membrane // inferred from electronic annotation /// 0016021 // integral to membrane // inferred fro…	0004872 // receptor activity // inferred from electronic annotation /// 0005048 // signal sequence binding // traceable author statement /// 0005515 // protein binding // inferred from physical interaction	chr3:157744244-157744716 (-) // 98.74 // q25.31
CCNL1	57018	220046_s_at	-1.70839	0006350 // transcription // inferred from electronic annotation /// 0006355 // regulation of transcription, DNA-dependent // inferred from electronic annotation	0005634 // nucleus // inferred from electronic annotation /// 0016607 // nuclear speck // inferred from electronic annotation		chr3:158348284-158360630 (-) // 98.46 // q25.32
CCNL1	57018	1555411_a_at	-1.69707	0006350 // transcription // inferred from electronic annotation /// 0006355 // regulation of transcription, DNA-dependent // inferred from electronic annotation	0005634 // nucleus // inferred from electronic annotation /// 0016607 // nuclear speck // inferred from electronic annotation		chr3:158348723-158360577 (-) // 98.52 // q25.32
CCNL1	57018	1555827_at	-2.41329	0006350 // transcription // inferred from electronic annotation /// 0006355 // regulation of transcription, DNA-dependent // inferred from electronic annotation	0005634 // nucleus // inferred from electronic annotation /// 0016607 // nuclear speck // inferred from electronic annotation		chr3:158348749-158360593 (-) // 86.01 // q25.32
MLF1	4291	204783_at	-2.31897	0002318 // myeloid progenitor cell differentiation // inferred from sequence or structural similarity /// 0006350 // transcription // inferred from sequence or structural similarity /// 0007049 // cell cycle // inferred from electronic annotation /// 0007050 // cell cycle arrest // inferred from direct assay /// 0007275 // multicellular organismal development // inferred from electronic annotatio…	0005634 // nucleus // inferred from sequence or structural similarity /// 0005634 // nucleus // inferred from electronic annotation /// 0005737 // cytoplasm // inferred from sequence or structural similarity /// 0005737 // cytoplasm // inferred from electronic annotation	0003677 // DNA binding // inferred from sequence or structural similarity /// 0003677 // DNA binding // inferred from electronic annotation /// 0005515 // protein binding // inferred from physical interaction /// 0019904 // protein domain specific binding // inferred from direct assay	chr3:159771670-159806946 (+) // 97.58 // q25.32
MLF1	4291	204784_s_at	-1.37102	0002318 // myeloid progenitor cell differentiation // inferred from sequence or structural similarity /// 0006350 // transcription // inferred from sequence or structural similarity /// 0007049 // cell cycle // inferred from electronic annotation /// 0007050 // cell cycle arrest // inferred from direct assay /// 0007275 // multicellular organismal development // inferred from electronic annotatio…	0005634 // nucleus // inferred from sequence or structural similarity /// 0005634 // nucleus // inferred from electronic annotation /// 0005737 // cytoplasm // inferred from sequence or structural similarity /// 0005737 // cytoplasm // inferred from electronic annotation	0003677 // DNA binding // inferred from sequence or structural similarity /// 0003677 // DNA binding // inferred from electronic annotation /// 0005515 // protein binding // inferred from physical interaction /// 0019904 // protein domain specific binding // inferred from direct assay	chr3:159771687-159805878 (+) // 98.03 // q25.32
RARRES1	5918	221872_at	-1.25247	0008285 // negative regulation of cell proliferation // traceable author statement	0005737 // cytoplasm // inferred from direct assay /// 0005794 // Golgi apparatus // inferred from direct assay /// 0016020 // membrane // inferred from electronic annotation /// 0016021 // integral to membrane // traceable author statement /// 0016021 // integral to membrane // inferred from electronic annotation		chr3:159897585-159911332 (-) // 80.64 // q25.32
SMC4	10051	201663_s_at	1.07047	0000070 // mitotic sister chromatid segregation // traceable author statement /// 0007049 // cell cycle // inferred from electronic annotation /// 0007067 // mitosis // inferred from electronic annotation /// 0007076 // mitotic chromosome condensation // inferred from direct assay /// 0007076 // mitotic chromosome condensation // inferred from electronic annotation /// 0051276 // chromosome organ…	0000796 // condensin complex // inferred from direct assay /// 0000796 // condensin complex // traceable author statement /// 0005634 // nucleus // traceable author statement /// 0005634 // nucleus // inferred from electronic annotation /// 0005694 // chromosome // inferred from electronic annotation /// 0005737 // cytoplasm // inferred from electronic annotation	0000166 // nucleotide binding // inferred from electronic annotation /// 0005515 // protein binding // inferred from electronic annotation /// 0005524 // ATP binding // traceable author statement /// 0005524 // ATP binding // inferred from electronic annotation /// 0046982 // protein heterodimerization activity // inferred from physical interaction	chr3:161600132-161634398 (+) // 99.78 // q26.1
TRIM59	286827	235476_at	-1.82081		0005622 // intracellular // inferred from electronic annotation /// 0016020 // membrane // inferred from electronic annotation /// 0016021 // integral to membrane // inferred from electronic annotation	0005515 // protein binding // inferred from electronic annotation /// 0008270 // zinc ion binding // inferred from electronic annotation /// 0046872 // metal ion binding // inferred from electronic annotation	chr3:161639070-161650207 (-) // 85.33 // q26.1
ARL14	80117	220468_at	-2.46442	0007264 // small GTPase mediated signal transduction // inferred from electronic annotation	0005622 // intracellular // inferred from electronic annotation	0000166 // nucleotide binding // inferred from electronic annotation /// 0005525 // GTP binding // inferred from electronic annotation	chr3:161877640-161878927 (+) // 96.48 // q26.1
ZMAT3	64393	219628_at	-1.71983	0006810 // transport // inferred from electronic annotation /// 0006915 // apoptosis // inferred from electronic annotation /// 0006974 // response to DNA damage stimulus // inferred from electronic annotation /// 0015031 // protein transport // inferred from electronic annotation /// 0040008 // regulation of growth // inferred from electronic annotation /// 0065002 // intracellular protein trans…	0005622 // intracellular // inferred from electronic annotation /// 0005634 // nucleus // inferred from electronic annotation	0003676 // nucleic acid binding // inferred from electronic annotation /// 0003723 // RNA binding // inferred from electronic annotation /// 0008270 // zinc ion binding // inferred from electronic annotation /// 0046872 // metal ion binding // inferred from electronic annotation	chr3:180224220-180272277 (-) // 85.0 // q26.32
ZNF639	51193	222623_s_at	-1.4227	0006350 // transcription // inferred from electronic annotation /// 0006355 // regulation of transcription, DNA-dependent // inferred from electronic annotation	0005622 // intracellular // inferred from electronic annotation /// 0005634 // nucleus // inferred from electronic annotation	0003677 // DNA binding // inferred from electronic annotation /// 0008270 // zinc ion binding // inferred from electronic annotation /// 0046872 // metal ion binding // inferred from electronic annotation	chr3:180524244-180536017 (+) // 75.46 // q26.32
ZNF639	51193	222624_s_at	-1.72991	0006350 // transcription // inferred from electronic annotation /// 0006355 // regulation of transcription, DNA-dependent // inferred from electronic annotation	0005622 // intracellular // inferred from electronic annotation /// 0005634 // nucleus // inferred from electronic annotation	0003677 // DNA binding // inferred from electronic annotation /// 0008270 // zinc ion binding // inferred from electronic annotation /// 0046872 // metal ion binding // inferred from electronic annotation	chr3:180524244-180536017 (+) // 75.46 // q26.32
TTC14	151613	225178_at	-1.25474			0003723 // RNA binding // inferred from electronic annotation /// 0005488 // binding // inferred from electronic annotation	chr3:181802676-181811611 (+) // 92.75 // q26.33
FXR1	8087	229519_at	-1.25612	0006915 // apoptosis // traceable author statement /// 0007275 // multicellular organismal development // inferred from electronic annotation /// 0007517 // muscle organ development // inferred from electronic annotation /// 0007519 // skeletal muscle tissue development // inferred from electronic annotation /// 0030154 // cell differentiation // inferred from electronic annotation	0005730 // nucleolus // traceable author statement /// 0005737 // cytoplasm // traceable author statement /// 0005737 // cytoplasm // inferred from electronic annotation /// 0005844 // polysome // traceable author statement	0003723 // RNA binding // traceable author statement /// 0003723 // RNA binding // inferred from electronic annotation	chr3:182170673-182172380 (+) // 96.58 // q26.33
ATP11B	23200	238811_at	-1.53345	0006754 // ATP biosynthetic process // inferred from electronic annotation /// 0006811 // ion transport // non-traceable author statement /// 0008152 // metabolic process // inferred from electronic annotation /// 0015914 // phospholipid transport // inferred from electronic annotation /// 0015917 // aminophospholipid transport // traceable author statement	0005637 // nuclear inner membrane // non-traceable author statement /// 0016020 // membrane // inferred from electronic annotation /// 0016021 // integral to membrane // inferred from electronic annotation	0000166 // nucleotide binding // inferred from electronic annotation /// 0000287 // magnesium ion binding // inferred from electronic annotation /// 0003824 // catalytic activity // inferred from electronic annotation /// 0004012 // phospholipid-translocating ATPase activity // traceable author statement /// 0004012 // phospholipid-translocating ATPase activity // inferred from electronic annotat…	chr3:183994060-184045981 (+) // 75.99 // q26.33
ATP11B	23200	212536_at	-1.75454	0006754 // ATP biosynthetic process // inferred from electronic annotation /// 0006811 // ion transport // non-traceable author statement /// 0008152 // metabolic process // inferred from electronic annotation /// 0015914 // phospholipid transport // inferred from electronic annotation /// 0015917 // aminophospholipid transport // traceable author statement	0005637 // nuclear inner membrane // non-traceable author statement /// 0016020 // membrane // inferred from electronic annotation /// 0016021 // integral to membrane // inferred from electronic annotation	0000166 // nucleotide binding // inferred from electronic annotation /// 0000287 // magnesium ion binding // inferred from electronic annotation /// 0003824 // catalytic activity // inferred from electronic annotation /// 0004012 // phospholipid-translocating ATPase activity // traceable author statement /// 0004012 // phospholipid-translocating ATPase activity // inferred from electronic annotat…	chr3:184065939-184122117 (+) // 99.07 // q26.33
LAMP3	27074	205569_at	-8.87321	0008283 // cell proliferation // traceable author statement	0005764 // lysosome // inferred from electronic annotation /// 0005765 // lysosomal membrane // traceable author statement /// 0005765 // lysosomal membrane // inferred from electronic annotation /// 0016020 // membrane // inferred from electronic annotation /// 0016021 // integral to membrane // inferred from electronic annotation		chr3:184322697-184363200 (-) // 84.36 // q27.1
KLHL24	54800	221985_at	-4.28866		0005737 // cytoplasm // inferred from electronic annotation /// 0042995 // cell projection // inferred from electronic annotation /// 0043204 // perikaryon // inferred from electronic annotation	0005515 // protein binding // inferred from electronic annotation	chr3:184836104-184880780 (+) // 92.75 // q27.1
KLHL24	54800	221986_s_at	-4.14031		0005737 // cytoplasm // inferred from electronic annotation /// 0042995 // cell projection // inferred from electronic annotation /// 0043204 // perikaryon // inferred from electronic annotation	0005515 // protein binding // inferred from electronic annotation	chr3:184836104-184880780 (+) // 92.75 // q27.1
KLHL24	54800	242088_at	-1.33177		0005737 // cytoplasm // inferred from electronic annotation /// 0042995 // cell projection // inferred from electronic annotation /// 0043204 // perikaryon // inferred from electronic annotation	0005515 // protein binding // inferred from electronic annotation	chr3:184880689-184881881 (+) // 90.74 // q27.1
KLHL24	54800	226158_at	-4.65856		0005737 // cytoplasm // inferred from electronic annotation /// 0042995 // cell projection // inferred from electronic annotation /// 0043204 // perikaryon // inferred from electronic annotation	0005515 // protein binding // inferred from electronic annotation	chr3:184882446-184884996 (+) // 87.41 // q27.1
YEATS2	55689	221203_s_at	-1.65132	0006355 // regulation of transcription, DNA-dependent // inferred from electronic annotation	0005634 // nucleus // inferred from electronic annotation		chr3:184915646-185013105 (+) // 98.34 // q27.1
DVL3	1857	201908_at	-3.97539	0007165 // signal transduction // non-traceable author statement /// 0007165 // signal transduction // traceable author statement /// 0007242 // intracellular signaling cascade // inferred from electronic annotation /// 0007275 // multicellular organismal development // inferred from electronic annotation /// 0007399 // nervous system development // traceable author statement /// 0007507 // heart…	0005622 // intracellular // inferred from electronic annotation /// 0005737 // cytoplasm // inferred from electronic annotation	0004871 // signal transducer activity // inferred from electronic annotation /// 0005515 // protein binding // inferred from electronic annotation /// 0005515 // protein binding // inferred from physical interaction /// 0008013 // beta-catenin binding // inferred from physical interaction /// 0016301 // kinase activity // inferred from electronic annotation	chr3:185355869-185373831 (+) // 75.41 // q27.1
AP2M1	1173	200613_at	-1.7588	0006810 // transport // inferred from electronic annotation /// 0006886 // intracellular protein transport // inferred from electronic annotation /// 0016192 // vesicle-mediated transport // inferred from electronic annotation /// 0050690 // regulation of defense response to virus by virus // not recorded	0005739 // mitochondrion // inferred from electronic annotation /// 0005778 // peroxisomal membrane // not recorded /// 0005829 // cytosol // not recorded /// 0005886 // plasma membrane // not recorded /// 0005886 // plasma membrane // inferred from electronic annotation /// 0005905 // coated pit // inferred from electronic annotation /// 0016020 // membrane // inferred from electronic annotation…	0005215 // transporter activity // traceable author statement /// 0005515 // protein binding // inferred from physical interaction /// 0005515 // protein binding // inferred from electronic annotation /// 0008289 // lipid binding // inferred from electronic annotation	chr3:185377430-185384572 (+) // 99.51 // q27.1
ABCF3	55324	202394_s_at	-1.20605			0000166 // nucleotide binding // inferred from electronic annotation /// 0005524 // ATP binding // inferred from electronic annotation /// 0016887 // ATPase activity // inferred from electronic annotation /// 0017111 // nucleoside-triphosphatase activity // inferred from electronic annotation	chr3:185386579-185394487 (+) // 99.84 // q27.1
ALG3	10195	207396_s_at	-1.08633	0006486 // protein amino acid glycosylation // non-traceable author statement	0005783 // endoplasmic reticulum // inferred from electronic annotation /// 0005789 // endoplasmic reticulum membrane // inferred from direct assay /// 0005789 // endoplasmic reticulum membrane // inferred from electronic annotation /// 0016020 // membrane // inferred from electronic annotation /// 0016021 // integral to membrane // inferred from electronic annotation	0000033 // alpha-1,3-mannosyltransferase activity // inferred from direct assay /// 0004584 // dolichyl-phosphate-mannose-glycolipid alpha-mannosyltransferase activity // inferred from electronic annotation /// 0016740 // transferase activity // inferred from electronic annotation /// 0016757 // transferase activity, transferring glycosyl groups // inferred from electronic annotation /// 0016758 …	chr3:185442906-185449453 (-) // 98.02 // q27.1
EIF4G1	1981	208624_s_at	-1.16564	0006412 // translation // inferred from electronic annotation /// 0006417 // regulation of translation // inferred from electronic annotation /// 0006446 // regulation of translational initiation // non-traceable author statement /// 0016070 // RNA metabolic process // inferred from electronic annotation /// 0044419 // interspecies interaction between organisms // inferred from electronic annotat…	0005737 // cytoplasm // non-traceable author statement /// 0005737 // cytoplasm // inferred from electronic annotation /// 0005829 // cytosol // not recorded /// 0016281 // eukaryotic translation initiation factor 4F complex // traceable author statement	0003723 // RNA binding // inferred from electronic annotation /// 0003743 // translation initiation factor activity // traceable author statement /// 0003743 // translation initiation factor activity // inferred from electronic annotation /// 0005488 // binding // inferred from electronic annotation /// 0005515 // protein binding // inferred from physical interaction /// 0005515 // protein bindin…	chr3:185515787-185535833 (+) // 98.36 // q27.1
EIF4G1	1981	208625_s_at	-1.04048	0006412 // translation // inferred from electronic annotation /// 0006417 // regulation of translation // inferred from electronic annotation /// 0006446 // regulation of translational initiation // non-traceable author statement /// 0016070 // RNA metabolic process // inferred from electronic annotation /// 0044419 // interspecies interaction between organisms // inferred from electronic annotat…	0005737 // cytoplasm // non-traceable author statement /// 0005737 // cytoplasm // inferred from electronic annotation /// 0005829 // cytosol // not recorded /// 0016281 // eukaryotic translation initiation factor 4F complex // traceable author statement	0003723 // RNA binding // inferred from electronic annotation /// 0003743 // translation initiation factor activity // traceable author statement /// 0003743 // translation initiation factor activity // inferred from electronic annotation /// 0005488 // binding // inferred from electronic annotation /// 0005515 // protein binding // inferred from physical interaction /// 0005515 // protein bindin…	chr3:185516661-185535823 (+) // 98.99 // q27.1
FAM131A	131408	221904_at	-2.84172		0005576 // extracellular region // inferred from electronic annotation		chr3:185536500-185546756 (+) // 97.41 // q27.1
POLR2H	5437	209302_at	-1.14764	0000398 // nuclear mRNA splicing, via spliceosome // not recorded /// 0006350 // transcription // traceable author statement /// 0006350 // transcription // inferred from electronic annotation /// 0006367 // transcription initiation from RNA polymerase II promoter // not recorded /// 0006368 // RNA elongation from RNA polymerase II promoter // not recorded	0005634 // nucleus // traceable author statement /// 0005634 // nucleus // inferred from electronic annotation /// 0005654 // nucleoplasm // not recorded	0003899 // DNA-directed RNA polymerase activity // non-traceable author statement /// 0003899 // DNA-directed RNA polymerase activity // inferred from electronic annotation /// 0005515 // protein binding // inferred from physical interaction /// 0008270 // zinc ion binding // non-traceable author statement	chr3:185563887-185569025 (+) // 90.89 // q27.1
VPS8	23355	239917_at	-1.61879			0005488 // binding // inferred from electronic annotation /// 0005515 // protein binding // inferred from electronic annotation /// 0008270 // zinc ion binding // inferred from electronic annotation /// 0046872 // metal ion binding // inferred from electronic annotation	chr3:186015872-186016301 (+) // 73.43 // q27.2
VPS8	23355	209553_at	-1.97846			0005488 // binding // inferred from electronic annotation /// 0005515 // protein binding // inferred from electronic annotation /// 0008270 // zinc ion binding // inferred from electronic annotation /// 0046872 // metal ion binding // inferred from electronic annotation	chr3:186200182-186253096 (+) // 98.38 // q27.2
TMEM41A	90407	225991_at	-2.53963		0016020 // membrane // inferred from electronic annotation /// 0016021 // integral to membrane // inferred from electronic annotation		chr3:186690083-186691544 (-) // 91.5 // q27.2
TMEM41A	90407	235037_at	-2.6133		0016020 // membrane // inferred from electronic annotation /// 0016021 // integral to membrane // inferred from electronic annotation		chr3:186691492-186699484 (-) // 77.75 // q27.2
LIPH	200879	235871_at	-2.89354	0006629 // lipid metabolic process // inferred from electronic annotation /// 0016042 // lipid catabolic process // inferred from electronic annotation	0005576 // extracellular region // inferred from electronic annotation /// 0016020 // membrane // inferred from electronic annotation	0003824 // catalytic activity // inferred from electronic annotation /// 0016787 // hydrolase activity // inferred from electronic annotation	chr3:186708260-186709020 (-) // 90.38 // q27.2
SENP2	59343	218122_s_at	-1.67468	0006508 // proteolysis // inferred from electronic annotation /// 0006810 // transport // inferred from electronic annotation /// 0015031 // protein transport // inferred from electronic annotation /// 0016055 // Wnt receptor signaling pathway // inferred from electronic annotation /// 0016926 // protein desumoylation // inferred from electronic annotation /// 0019941 // modification-dependent pr…	0005634 // nucleus // inferred from electronic annotation /// 0005643 // nuclear pore // inferred from direct assay /// 0005643 // nuclear pore // inferred from electronic annotation /// 0005737 // cytoplasm // inferred from electronic annotation /// 0016020 // membrane // inferred from electronic annotation /// 0031965 // nuclear membrane // inferred from electronic annotation	0005515 // protein binding // inferred from physical interaction /// 0008233 // peptidase activity // inferred from electronic annotation /// 0008234 // cysteine-type peptidase activity // inferred from electronic annotation /// 0016787 // hydrolase activity // inferred from electronic annotation /// 0016929 // SUMO-specific protease activity // inferred from direct assay	chr3:186786724-186830869 (+) // 96.76 // q27.2
SENP2	59343	222523_at	-2.1096	0006508 // proteolysis // inferred from electronic annotation /// 0006810 // transport // inferred from electronic annotation /// 0015031 // protein transport // inferred from electronic annotation /// 0016055 // Wnt receptor signaling pathway // inferred from electronic annotation /// 0016926 // protein desumoylation // inferred from electronic annotation /// 0019941 // modification-dependent pr…	0005634 // nucleus // inferred from electronic annotation /// 0005643 // nuclear pore // inferred from direct assay /// 0005643 // nuclear pore // inferred from electronic annotation /// 0005737 // cytoplasm // inferred from electronic annotation /// 0016020 // membrane // inferred from electronic annotation /// 0031965 // nuclear membrane // inferred from electronic annotation	0005515 // protein binding // inferred from physical interaction /// 0008233 // peptidase activity // inferred from electronic annotation /// 0008234 // cysteine-type peptidase activity // inferred from electronic annotation /// 0016787 // hydrolase activity // inferred from electronic annotation /// 0016929 // SUMO-specific protease activity // inferred from direct assay	chr3:186786724-186831693 (+) // 54.42 // q27.2
IGF2BP2	10644	218847_at	-2.04733	0006417 // regulation of translation // inferred from electronic annotation /// 0009653 // anatomical structure morphogenesis // traceable author statement /// 0017148 // negative regulation of translation // inferred from sequence or structural similarity /// 0042035 // regulation of cytokine biosynthetic process // inferred by curator	0005634 // nucleus // inferred from direct assay /// 0005737 // cytoplasm // inferred from electronic annotation /// 0005737 // cytoplasm // inferred from direct assay /// 0044430 // cytoskeletal part // inferred from direct assay	0000166 // nucleotide binding // inferred from electronic annotation /// 0003676 // nucleic acid binding // inferred from electronic annotation /// 0003723 // RNA binding // inferred from electronic annotation /// 0005515 // protein binding // inferred from physical interaction /// 0045182 // translation regulator activity // inferred from sequence or structural similarity /// 0048027 // mRNA 5'-…	chr3:186844468-187025506 (-) // 86.64 // q27.2
ETV5	2119	230102_at	-3.3124	0006355 // regulation of transcription, DNA-dependent // inferred from electronic annotation /// 0009887 // organ morphogenesis // inferred from electronic annotation /// 0045941 // positive regulation of transcription // inferred from electronic annotation	0005634 // nucleus // inferred from electronic annotation	0003677 // DNA binding // inferred from electronic annotation /// 0003677 // DNA binding // traceable author statement /// 0003700 // transcription factor activity // traceable author statement /// 0003700 // transcription factor activity // inferred from electronic annotation /// 0016563 // transcription activator activity // inferred from electronic annotation /// 0043565 // sequence-specific D…	chr3:187246796-187247186 (+) // 96.05 // q27.2
ETV5	2119	203348_s_at	-3.24706	0006355 // regulation of transcription, DNA-dependent // inferred from electronic annotation /// 0009887 // organ morphogenesis // inferred from electronic annotation /// 0045941 // positive regulation of transcription // inferred from electronic annotation	0005634 // nucleus // inferred from electronic annotation	0003677 // DNA binding // inferred from electronic annotation /// 0003677 // DNA binding // traceable author statement /// 0003700 // transcription factor activity // traceable author statement /// 0003700 // transcription factor activity // inferred from electronic annotation /// 0016563 // transcription activator activity // inferred from electronic annotation /// 0043565 // sequence-specific D…	chr3:187246803-187309571 (-) // 98.67 // q27.2
ETV5	2119	203349_s_at	-4.00471	0006355 // regulation of transcription, DNA-dependent // inferred from electronic annotation /// 0009887 // organ morphogenesis // inferred from electronic annotation /// 0045941 // positive regulation of transcription // inferred from electronic annotation	0005634 // nucleus // inferred from electronic annotation	0003677 // DNA binding // inferred from electronic annotation /// 0003677 // DNA binding // traceable author statement /// 0003700 // transcription factor activity // traceable author statement /// 0003700 // transcription factor activity // inferred from electronic annotation /// 0016563 // transcription activator activity // inferred from electronic annotation /// 0043565 // sequence-specific D…	chr3:187246803-187309571 (-) // 99.71 // q27.2
DNAJB11	51726	223054_at	-2.01555	0006457 // protein folding // inferred from electronic annotation /// 0016556 // mRNA modification // inferred from electronic annotation	0005634 // nucleus // inferred from electronic annotation /// 0005737 // cytoplasm // inferred from electronic annotation /// 0005783 // endoplasmic reticulum // traceable author statement /// 0005783 // endoplasmic reticulum // inferred from electronic annotation /// 0005788 // endoplasmic reticulum lumen // inferred from electronic annotation	0005515 // protein binding // inferred from electronic annotation /// 0005515 // protein binding // inferred from physical interaction /// 0031072 // heat shock protein binding // inferred from electronic annotation /// 0051082 // unfolded protein binding // inferred from electronic annotation	chr3:187771220-187785916 (+) // 98.59 // q27.3
EIF4A2	1974	1555996_s_at	-2.20002	0006412 // translation // inferred from electronic annotation /// 0006446 // regulation of translational initiation // traceable author statement /// 0044419 // interspecies interaction between organisms // inferred from electronic annotation	0005829 // cytosol // not recorded /// 0016281 // eukaryotic translation initiation factor 4F complex // traceable author statement	0000166 // nucleotide binding // inferred from electronic annotation /// 0003676 // nucleic acid binding // inferred from electronic annotation /// 0003723 // RNA binding // inferred from electronic annotation /// 0003743 // translation initiation factor activity // traceable author statement /// 0003743 // translation initiation factor activity // inferred from electronic annotation /// 0004386 …	chr3:187987868-187989291 (+) // 98.53 // q27.3
BCL6	604	203140_at	-1.74929	0000060 // protein import into nucleus, translocation // inferred from genetic interaction /// 0000122 // negative regulation of transcription from RNA polymerase II promoter // inferred from direct assay /// 0000122 // negative regulation of transcription from RNA polymerase II promoter // inferred from electronic annotation /// 0000902 // cell morphogenesis // inferred from electronic annotatio…	0005622 // intracellular // inferred from electronic annotation /// 0005634 // nucleus // inferred from direct assay /// 0005634 // nucleus // inferred from electronic annotation /// 0005657 // replication fork // inferred from direct assay	0003676 // nucleic acid binding // inferred from electronic annotation /// 0003677 // DNA binding // inferred from electronic annotation /// 0003682 // chromatin binding // inferred from direct assay /// 0003700 // transcription factor activity // inferred from mutant phenotype /// 0005515 // protein binding // inferred from physical interaction /// 0005515 // protein binding // inferred from ele…	chr3:188921865-188946169 (-) // 97.94 // q27.3
LPP	4026	202822_at	-2.50424	0007155 // cell adhesion // inferred from electronic annotation	0005634 // nucleus // inferred from electronic annotation /// 0005737 // cytoplasm // inferred from electronic annotation /// 0005886 // plasma membrane // inferred from electronic annotation /// 0016020 // membrane // inferred from electronic annotation /// 0030054 // cell junction // inferred from electronic annotation	0005515 // protein binding // inferred from electronic annotation /// 0008270 // zinc ion binding // inferred from electronic annotation /// 0046872 // metal ion binding // inferred from electronic annotation	chr3:189413414-190079261 (+) // 92.91 // q28
SRD5A1	6715	211056_s_at	-1.13201	0006629 // lipid metabolic process // inferred from electronic annotation /// 0006702 // androgen biosynthetic process // inferred from electronic annotation /// 0007530 // sex determination // non-traceable author statement /// 0007530 // sex determination // inferred from electronic annotation /// 0008202 // steroid metabolic process // inferred from electronic annotation /// 0030154 // cell di…	0005737 // cytoplasm // inferred from electronic annotation /// 0005783 // endoplasmic reticulum // inferred from electronic annotation /// 0005789 // endoplasmic reticulum membrane // inferred from electronic annotation /// 0005792 // microsome // inferred from electronic annotation /// 0016020 // membrane // inferred from electronic annotation /// 0016021 // integral to membrane // inferred fro…	0003865 // 3-oxo-5-alpha-steroid 4-dehydrogenase activity // inferred from electronic annotation /// 0009055 // electron carrier activity // traceable author statement /// 0016491 // oxidoreductase activity // inferred from electronic annotation /// 0016627 // oxidoreductase activity, acting on the CH-CH group of donors // inferred from electronic annotation	chr5:6686581-6722509 (+) // 98.58 // p15.31 /// chrX:138356642-138358746 (+) // 90.31 // q27.1
PARL	55486	218271_s_at	-1.42914		0005634 // nucleus // inferred from electronic annotation /// 0005739 // mitochondrion // inferred from electronic annotation /// 0005743 // mitochondrial inner membrane // inferred from electronic annotation /// 0016020 // membrane // inferred from electronic annotation /// 0016021 // integral to membrane // inferred from electronic annotation	0008233 // peptidase activity // inferred from electronic annotation /// 0008236 // serine-type peptidase activity // inferred from electronic annotation /// 0016787 // hydrolase activity // inferred from electronic annotation	chr6:143705147-143706407 (+) // 91.13 // q24.2 /// chr3:185029885-185085256 (-) // 99.84 // q27.1
KPNA4	3840	225267_at	-1.28148	0006606 // protein import into nucleus // inferred from electronic annotation /// 0006607 // NLS-bearing substrate import into nucleus // traceable author statement /// 0006810 // transport // inferred from electronic annotation /// 0006886 // intracellular protein transport // inferred from electronic annotation /// 0015031 // protein transport // inferred from electronic annotation	0005634 // nucleus // inferred from electronic annotation /// 0005643 // nuclear pore // inferred from electronic annotation /// 0005737 // cytoplasm // inferred from electronic annotation	0005488 // binding // inferred from electronic annotation /// 0005515 // protein binding // inferred from physical interaction /// 0005515 // protein binding // inferred from electronic annotation /// 0008565 // protein transporter activity // inferred from electronic annotation	chr6:86057788-86059464 (+) // 91.81 // q14.3 /// chr3:161700649-161702363 (-) // 96.05 // q26.1
KPNA4	3840	225268_at	-1.47309	0006606 // protein import into nucleus // inferred from electronic annotation /// 0006607 // NLS-bearing substrate import into nucleus // traceable author statement /// 0006810 // transport // inferred from electronic annotation /// 0006886 // intracellular protein transport // inferred from electronic annotation /// 0015031 // protein transport // inferred from electronic annotation	0005634 // nucleus // inferred from electronic annotation /// 0005643 // nuclear pore // inferred from electronic annotation /// 0005737 // cytoplasm // inferred from electronic annotation	0005488 // binding // inferred from electronic annotation /// 0005515 // protein binding // inferred from physical interaction /// 0005515 // protein binding // inferred from electronic annotation /// 0008565 // protein transporter activity // inferred from electronic annotation	chr6:86057788-86059464 (+) // 91.81 // q14.3 /// chr3:161700649-161702363 (-) // 96.05 // q26.1
GLIS3	169792	229435_at	-1.85385	0000122 // negative regulation of transcription from RNA polymerase II promoter // inferred from sequence or structural similarity /// 0000122 // negative regulation of transcription from RNA polymerase II promoter // inferred from electronic annotation /// 0006350 // transcription // inferred from electronic annotation /// 0006355 // regulation of transcription, DNA-dependent // inferred from el…	0005622 // intracellular // inferred from electronic annotation /// 0005634 // nucleus // inferred from electronic annotation /// 0005634 // nucleus // inferred from sequence or structural similarity /// 0044428 // nuclear part // inferred from electronic annotation	0003676 // nucleic acid binding // inferred from electronic annotation /// 0003677 // DNA binding // inferred from electronic annotation /// 0003700 // transcription factor activity // inferred from electronic annotation /// 0003704 // specific RNA polymerase II transcription factor activity // inferred from sequence or structural similarity /// 0003704 // specific RNA polymerase II transcription…	chr9:3814127-3814934 (-) // 94.23 // p24.2
GLIS3	169792	230258_at	-2.58227	0000122 // negative regulation of transcription from RNA polymerase II promoter // inferred from sequence or structural similarity /// 0000122 // negative regulation of transcription from RNA polymerase II promoter // inferred from electronic annotation /// 0006350 // transcription // inferred from electronic annotation /// 0006355 // regulation of transcription, DNA-dependent // inferred from el…	0005622 // intracellular // inferred from electronic annotation /// 0005634 // nucleus // inferred from electronic annotation /// 0005634 // nucleus // inferred from sequence or structural similarity /// 0044428 // nuclear part // inferred from electronic annotation	0003676 // nucleic acid binding // inferred from electronic annotation /// 0003677 // DNA binding // inferred from electronic annotation /// 0003700 // transcription factor activity // inferred from electronic annotation /// 0003704 // specific RNA polymerase II transcription factor activity // inferred from sequence or structural similarity /// 0003704 // specific RNA polymerase II transcription…	chr9:3815254-3815948 (-) // 95.0 // p24.2
