# Supplementary material for: Molecular Mechanisms of Bortezomib Resistant Adenocarcinoma Cells
Source: PLoS One. 2011 Dec 22;6(12):e27996. doi: 10.1371/journal.pone.0027996 (PMC3245226; doi:10.1371/journal.pone.0027996)
Supplement: Table S5 — Genes Amplified in BR100 with a Two Fold or Greater Gene Expression Change. (XLSX) [file pone.0027996.s010.xlsx]

## Sheet: Table S5
Table S5 - Genes Amplified in BR100 with a Two Fold or Greater Gene Expression Change
Gene Symbol	Entrez Gene	Probe	gene expBR100 Fold Change (Log2)	Gene Ontology Biological Process	Gene Ontology Cellular Component	Gene Ontology Molecular Function	Alignments
MAP1LC3B	81631	208786_s_at	-3.06299	0006914 // autophagy // inferred from electronic annotation /// 0019941 // modification-dependent protein catabolic process // inferred from electronic annotation	0005622 // intracellular // inferred from direct assay /// 0005737 // cytoplasm // inferred from electronic annotation /// 0005776 // autophagic vacuole // inferred from sequence or structural similarity /// 0005874 // microtubule // inferred from electronic annotation /// 0012505 // endomembrane system // inferred from electronic annotation /// 0016020 // membrane // inferred from electronic ann…	0005515 // protein binding // inferred from physical interaction	chr12:115498041-115498781 (+) // 37.53 // q24.22 /// chr16:85983442-85995666 (+) // 94.32 // q24.2
PABPN1	8106	201545_s_at	1.16512	0000398 // nuclear mRNA splicing, via spliceosome // not recorded /// 0006396 // RNA processing // traceable author statement /// 0006397 // mRNA processing // inferred from electronic annotation /// 0006936 // muscle contraction // traceable author statement	0005634 // nucleus // inferred from electronic annotation /// 0005634 // nucleus // inferred from direct assay /// 0005654 // nucleoplasm // not recorded /// 0005730 // nucleolus // inferred from direct assay /// 0005737 // cytoplasm // inferred from electronic annotation /// 0005737 // cytoplasm // inferred from direct assay	0000166 // nucleotide binding // inferred from electronic annotation /// 0003676 // nucleic acid binding // inferred from electronic annotation /// 0003723 // RNA binding // traceable author statement /// 0003723 // RNA binding // inferred from electronic annotation /// 0005515 // protein binding // inferred from physical interaction	chr14:22859236-22865207 (+) // 85.0 // q11.2
PABPN1	8106	213046_at	1.36155	0000398 // nuclear mRNA splicing, via spliceosome // not recorded /// 0006396 // RNA processing // traceable author statement /// 0006397 // mRNA processing // inferred from electronic annotation /// 0006936 // muscle contraction // traceable author statement	0005634 // nucleus // inferred from electronic annotation /// 0005634 // nucleus // inferred from direct assay /// 0005654 // nucleoplasm // not recorded /// 0005730 // nucleolus // inferred from direct assay /// 0005737 // cytoplasm // inferred from electronic annotation /// 0005737 // cytoplasm // inferred from direct assay	0000166 // nucleotide binding // inferred from electronic annotation /// 0003676 // nucleic acid binding // inferred from electronic annotation /// 0003723 // RNA binding // traceable author statement /// 0003723 // RNA binding // inferred from electronic annotation /// 0005515 // protein binding // inferred from physical interaction	chr14:22863096-22864485 (+) // 69.29 // q11.2
LOXL1	4016	203570_at	2.06748	0018277 // protein amino acid deamination // traceable author statement /// 0055114 // oxidation reduction // traceable author statement /// 0055114 // oxidation reduction // inferred from electronic annotation	0005576 // extracellular region // traceable author statement /// 0005576 // extracellular region // inferred from electronic annotation /// 0005578 // proteinaceous extracellular matrix // inferred from electronic annotation /// 0031012 // extracellular matrix // inferred from electronic annotation	0004720 // protein-lysine 6-oxidase activity // inferred from electronic annotation /// 0005507 // copper ion binding // inferred from electronic annotation /// 0005515 // protein binding // inferred from electronic annotation /// 0016491 // oxidoreductase activity // inferred from electronic annotation /// 0016641 // oxidoreductase activity, acting on the CH-NH2 group of donors, oxygen as accept…	chr15:72005872-72031529 (+) // 96.43 // q24.1
STRA6	64220	221701_s_at	-2.20893	0006810 // transport // inferred from electronic annotation	0005886 // plasma membrane // inferred from electronic annotation /// 0016020 // membrane // inferred from electronic annotation /// 0016021 // integral to membrane // inferred from electronic annotation /// 0043234 // protein complex // inferred from direct assay	0004872 // receptor activity // inferred from electronic annotation	chr15:72258862-72281844 (-) // 96.52 // q24.1
COMMD4	54939	209132_s_at	2.3098		0005737 // cytoplasm // inferred from direct assay	0005515 // protein binding // inferred from physical interaction	chr15:73415446-73421321 (+) // 52.41 // q24.2
COMMD4	54939	206441_s_at	2.35022		0005737 // cytoplasm // inferred from direct assay	0005515 // protein binding // inferred from physical interaction	chr15:73415452-73419665 (+) // 97.17 // q24.2
WDR61	80349	221531_at	1.38203				chr15:76362805-76375123 (-) // 98.99 // q25.1
WDR61	80349	221532_s_at	1.07561				chr15:76362805-76375123 (-) // 98.99 // q25.1
CTSH	1512	202295_s_at	1.4866	0006508 // proteolysis // traceable author statement /// 0006508 // proteolysis // inferred from electronic annotation /// 0006508 // proteolysis // inferred from direct assay	0005764 // lysosome // inferred from electronic annotation	0004197 // cysteine-type endopeptidase activity // traceable author statement /// 0004197 // cysteine-type endopeptidase activity // inferred from direct assay /// 0004197 // cysteine-type endopeptidase activity // inferred from electronic annotation /// 0005515 // protein binding // inferred from physical interaction /// 0008233 // peptidase activity // inferred from electronic annotation /// 00…	chr15:77001170-77024406 (-) // 99.14 // q25.1
MAN2A2	4122	219999_at	-1.23313	0005975 // carbohydrate metabolic process // non-traceable author statement /// 0005975 // carbohydrate metabolic process // inferred from electronic annotation /// 0006013 // mannose metabolic process // inferred from electronic annotation /// 0008152 // metabolic process // inferred from electronic annotation	0000139 // Golgi membrane // non-traceable author statement /// 0000139 // Golgi membrane // inferred from electronic annotation /// 0005794 // Golgi apparatus // inferred from electronic annotation /// 0016020 // membrane // inferred from electronic annotation /// 0016021 // integral to membrane // inferred from electronic annotation	0003824 // catalytic activity // inferred from electronic annotation /// 0004553 // hydrolase activity, hydrolyzing O-glycosyl compounds // inferred from electronic annotation /// 0004559 // alpha-mannosidase activity // inferred from electronic annotation /// 0004572 // mannosyl-oligosaccharide 1,3-1,6-alpha-mannosidase activity // non-traceable author statement /// 0004572 // mannosyl-oligosacc…	chr15:89265919-89266811 (+) // 28.39 // q26.1
MLKL	197259	238025_at	1.50502	0006468 // protein amino acid phosphorylation // inferred from electronic annotation		0004672 // protein kinase activity // inferred from electronic annotation /// 0004713 // protein tyrosine kinase activity // inferred from electronic annotation /// 0005515 // protein binding // inferred from physical interaction /// 0005524 // ATP binding // inferred from electronic annotation	chr16:73263262-73267100 (-) // 56.49 // q22.3
WDR59	79726	221981_s_at	1.50048				chr16:73502644-73534218 (-) // 95.25 // q23.1
CFDP1	10428	203166_at	1.35321	0006916 // anti-apoptosis // inferred from electronic annotation /// 0007155 // cell adhesion // inferred from electronic annotation /// 0007275 // multicellular organismal development // inferred from electronic annotation /// 0008360 // regulation of cell shape // inferred from electronic annotation /// 0042127 // regulation of cell proliferation // inferred from electronic annotation			chr16:73885115-74024860 (-) // 99.92 // q23.1
CFDP1	10428	236588_at	1.87367	0006916 // anti-apoptosis // inferred from electronic annotation /// 0007155 // cell adhesion // inferred from electronic annotation /// 0007275 // multicellular organismal development // inferred from electronic annotation /// 0008360 // regulation of cell shape // inferred from electronic annotation /// 0042127 // regulation of cell proliferation // inferred from electronic annotation			chr16:73963603-73964042 (-) // 98.43 // q23.1
COTL1	23406	221059_s_at	1.8428	0005975 // carbohydrate metabolic process // inferred from electronic annotation /// 0006044 // N-acetylglucosamine metabolic process // inferred by curator /// 0006044 // N-acetylglucosamine metabolic process // inferred from direct assay /// 0006790 // sulfur metabolic process // inferred from direct assay /// 0018146 // keratan sulfate biosynthetic process // inferred from direct assay /// 005…	0000139 // Golgi membrane // inferred from electronic annotation /// 0005622 // intracellular // inferred from electronic annotation /// 0005737 // cytoplasm // inferred from electronic annotation /// 0005794 // Golgi apparatus // inferred from electronic annotation /// 0005794 // Golgi apparatus // traceable author statement /// 0005856 // cytoskeleton // inferred from electronic annotation /// …	0001517 // N-acetylglucosamine 6-O-sulfotransferase activity // inferred from direct assay /// 0001517 // N-acetylglucosamine 6-O-sulfotransferase activity // traceable author statement /// 0003779 // actin binding // inferred from direct assay /// 0003779 // actin binding // inferred from electronic annotation /// 0005515 // protein binding // inferred from electronic annotation /// 0005515 // p…	chr16:74069850-74086783 (-) // 75.2 // q23.1
ADAT1	23536	219384_s_at	1.53282	0006396 // RNA processing // inferred from electronic annotation /// 0008033 // tRNA processing // inferred from mutant phenotype /// 0008033 // tRNA processing // inferred from electronic annotation		0003723 // RNA binding // inferred from mutant phenotype /// 0003723 // RNA binding // inferred from electronic annotation /// 0004000 // adenosine deaminase activity // inferred from electronic annotation /// 0008251 // tRNA-specific adenosine deaminase activity // inferred from mutant phenotype /// 0008270 // zinc ion binding // inferred from electronic annotation /// 0016787 // hydrolase activ…	chr16:74190573-74213865 (-) // 77.78 // q23.1
CLEC3A	10143	231802_at	1.97577	0001501 // skeletal system development // traceable author statement		0005488 // binding // inferred from electronic annotation /// 0005529 // sugar binding // traceable author statement /// 0005529 // sugar binding // inferred from electronic annotation	chr16:76613945-76622821 (+) // 99.36 // q23.1
WWOX	51741	219077_s_at	2.58029	0007049 // cell cycle // inferred from electronic annotation /// 0008152 // metabolic process // inferred from electronic annotation /// 0008202 // steroid metabolic process // traceable author statement /// 0045786 // negative regulation of cell cycle // inferred from electronic annotation /// 0055114 // oxidation reduction // traceable author statement /// 0055114 // oxidation reduction // infe…	0005634 // nucleus // inferred from electronic annotation /// 0005737 // cytoplasm // traceable author statement /// 0005737 // cytoplasm // inferred from electronic annotation /// 0005739 // mitochondrion // inferred from electronic annotation /// 0005794 // Golgi apparatus // inferred from direct assay /// 0005794 // Golgi apparatus // inferred from electronic annotation	0003824 // catalytic activity // inferred from electronic annotation /// 0005488 // binding // inferred from electronic annotation /// 0005515 // protein binding // inferred from electronic annotation /// 0005515 // protein binding // inferred from physical interaction /// 0016491 // oxidoreductase activity // non-traceable author statement /// 0016491 // oxidoreductase activity // traceable auth…	chr16:76691051-77804064 (+) // 98.94 // q23.1
WWOX	51741	223868_s_at	2.24694	0001649 // osteoblast differentiation // inferred from electronic annotation /// 0006917 // induction of apoptosis // inferred from electronic annotation /// 0007049 // cell cycle // inferred from electronic annotation /// 0008152 // metabolic process // inferred from electronic annotation /// 0008202 // steroid metabolic process // traceable author statement /// 0045786 // negative regulation of…	0005634 // nucleus // inferred from electronic annotation /// 0005737 // cytoplasm // traceable author statement /// 0005737 // cytoplasm // inferred from electronic annotation /// 0005739 // mitochondrion // inferred from electronic annotation /// 0005794 // Golgi apparatus // inferred from direct assay /// 0005794 // Golgi apparatus // inferred from electronic annotation	0003824 // catalytic activity // inferred from electronic annotation /// 0005488 // binding // inferred from electronic annotation /// 0005515 // protein binding // inferred from electronic annotation /// 0005515 // protein binding // inferred from physical interaction /// 0016491 // oxidoreductase activity // non-traceable author statement /// 0016491 // oxidoreductase activity // traceable auth…	chr16:76691076-76870094 (+) // 99.86 // q23.1
WWOX	51741	221147_x_at	2.90168	0001649 // osteoblast differentiation // inferred from electronic annotation /// 0006917 // induction of apoptosis // inferred from electronic annotation /// 0007049 // cell cycle // inferred from electronic annotation /// 0008152 // metabolic process // inferred from electronic annotation /// 0008202 // steroid metabolic process // traceable author statement /// 0045786 // negative regulation of…	0005634 // nucleus // inferred from electronic annotation /// 0005737 // cytoplasm // traceable author statement /// 0005737 // cytoplasm // inferred from electronic annotation /// 0005739 // mitochondrion // inferred from electronic annotation /// 0005794 // Golgi apparatus // inferred from direct assay /// 0005794 // Golgi apparatus // inferred from electronic annotation	0003824 // catalytic activity // inferred from electronic annotation /// 0005488 // binding // inferred from electronic annotation /// 0005515 // protein binding // inferred from electronic annotation /// 0005515 // protein binding // inferred from physical interaction /// 0016491 // oxidoreductase activity // non-traceable author statement /// 0016491 // oxidoreductase activity // traceable auth…	chr16:76691091-77282690 (+) // 97.14 // q23.1
WWOX	51741	210695_s_at	2.74353	0001649 // osteoblast differentiation // inferred from electronic annotation /// 0006917 // induction of apoptosis // inferred from electronic annotation /// 0007049 // cell cycle // inferred from electronic annotation /// 0008152 // metabolic process // inferred from electronic annotation /// 0008202 // steroid metabolic process // traceable author statement /// 0045786 // negative regulation of…	0005634 // nucleus // inferred from electronic annotation /// 0005737 // cytoplasm // traceable author statement /// 0005737 // cytoplasm // inferred from electronic annotation /// 0005739 // mitochondrion // inferred from electronic annotation /// 0005794 // Golgi apparatus // inferred from direct assay /// 0005794 // Golgi apparatus // inferred from electronic annotation	0003824 // catalytic activity // inferred from electronic annotation /// 0005488 // binding // inferred from electronic annotation /// 0005515 // protein binding // inferred from electronic annotation /// 0005515 // protein binding // inferred from physical interaction /// 0016491 // oxidoreductase activity // non-traceable author statement /// 0016491 // oxidoreductase activity // traceable auth…	chr16:76755624-77803877 (+) // 98.92 // q23.1
CENPN	55839	222118_at	2.56015		0000775 // chromosome, centromeric region // inferred from electronic annotation /// 0000777 // condensed chromosome kinetochore // inferred from electronic annotation /// 0005634 // nucleus // inferred from electronic annotation /// 0005694 // chromosome // inferred from electronic annotation		chr16:79597603-79620443 (+) // 92.23 // q23.2
CENPN	55839	219555_s_at	2.26908		0000775 // chromosome, centromeric region // inferred from electronic annotation /// 0000777 // condensed chromosome kinetochore // inferred from electronic annotation /// 0005634 // nucleus // inferred from electronic annotation /// 0005694 // chromosome // inferred from electronic annotation		chr16:79598064-79613979 (+) // 96.92 // q23.2
MPHOSPH6	10200	1554906_a_at	2.26716	0000087 // M phase of mitotic cell cycle // traceable author statement	0005634 // nucleus // inferred from electronic annotation /// 0005737 // cytoplasm // inferred from electronic annotation	0005515 // protein binding // inferred from physical interaction	chr16:80755022-80755302 (-) // 70.3 // q23.3
HSBP1	3281	200942_s_at	1.68673	0000122 // negative regulation of transcription from RNA polymerase II promoter // traceable author statement	0005634 // nucleus // traceable author statement /// 0005634 // nucleus // inferred from electronic annotation	0003714 // transcription corepressor activity // traceable author statement	chr16:82399128-82402773 (+) // 97.62 // q23.3
COTL1	23406	224583_at	1.94944	0050832 // defense response to fungus // inferred from electronic annotation	0005622 // intracellular // inferred from electronic annotation /// 0005737 // cytoplasm // inferred from electronic annotation /// 0005856 // cytoskeleton // inferred from electronic annotation	0003779 // actin binding // inferred from direct assay /// 0003779 // actin binding // inferred from electronic annotation /// 0005515 // protein binding // inferred from electronic annotation /// 0005515 // protein binding // inferred from physical interaction /// 0019899 // enzyme binding // inferred from physical interaction /// 0019899 // enzyme binding // inferred from electronic annotation	chr16:83156702-83209185 (-) // 90.38 // q24.1
CRISPLD2	83716	221541_at	2.85975	0030324 // lung development // inferred from electronic annotation	0005576 // extracellular region // inferred from electronic annotation /// 0030133 // transport vesicle // inferred from direct assay		chr16:83411112-83500614 (+) // 92.17 // q24.1
COX4NB	10328	218057_x_at	1.0444		0005634 // nucleus // traceable author statement /// 0005737 // cytoplasm // traceable author statement /// 0005739 // mitochondrion // traceable author statement /// 0005739 // mitochondrion // inferred from electronic annotation		chr16:84370504-84390518 (-) // 99.72 // q24.1
FOXL1	2300	243409_at	-3.04355	0006350 // transcription // inferred from electronic annotation /// 0006355 // regulation of transcription, DNA-dependent // non-traceable author statement /// 0006355 // regulation of transcription, DNA-dependent // inferred from electronic annotation /// 0007275 // multicellular organismal development // non-traceable author statement	0005634 // nucleus // inferred by curator /// 0005634 // nucleus // inferred from electronic annotation	0003677 // DNA binding // inferred from direct assay /// 0003677 // DNA binding // inferred from electronic annotation /// 0003700 // transcription factor activity // traceable author statement /// 0003700 // transcription factor activity // inferred from electronic annotation /// 0008301 // DNA bending activity // non-traceable author statement /// 0043565 // sequence-specific DNA binding // inf…	chr16:85172376-85172798 (+) // 97.46 // q24.1
FBXO31	79791	219785_s_at	2.34181	0019941 // modification-dependent protein catabolic process // inferred from electronic annotation			chr16:85893923-85908523 (-) // 90.93 // q24.2
MAP1LC3B	81631	208785_s_at	-1.77265	0006914 // autophagy // inferred from electronic annotation /// 0019941 // modification-dependent protein catabolic process // inferred from electronic annotation	0005622 // intracellular // inferred from direct assay /// 0005737 // cytoplasm // inferred from electronic annotation /// 0005776 // autophagic vacuole // inferred from sequence or structural similarity /// 0005874 // microtubule // inferred from electronic annotation /// 0012505 // endomembrane system // inferred from electronic annotation /// 0016020 // membrane // inferred from electronic ann…	0005515 // protein binding // inferred from physical interaction	chr16:85983442-85995881 (+) // 94.02 // q24.2
KLHDC4	54758	221219_s_at	1.46729				chr16:86298922-86342049 (-) // 98.47 // q24.2
SLC7A5	8140	201195_s_at	-3.45164	0006520 // amino acid metabolic process // traceable author statement /// 0006810 // transport // traceable author statement /// 0006810 // transport // inferred from electronic annotation /// 0006865 // amino acid transport // inferred from electronic annotation /// 0007275 // multicellular organismal development // inferred from electronic annotation /// 0007399 // nervous system development //…	0005737 // cytoplasm // inferred from electronic annotation /// 0005886 // plasma membrane // non-traceable author statement /// 0005886 // plasma membrane // inferred from electronic annotation /// 0016020 // membrane // inferred from electronic annotation /// 0016021 // integral to membrane // inferred from electronic annotation /// 0016324 // apical plasma membrane // inferred from electronic …	0015171 // amino acid transmembrane transporter activity // inferred from electronic annotation /// 0015171 // amino acid transmembrane transporter activity // inferred from sequence or structural similarity /// 0015175 // neutral amino acid transmembrane transporter activity // traceable author statement /// 0015179 // L-amino acid transmembrane transporter activity // inferred from electronic a…	chr16:86421129-86460594 (-) // 96.83 // q24.2
ZC3H18	124245	238416_x_at	1.47631		0005634 // nucleus // inferred from electronic annotation	0003676 // nucleic acid binding // inferred from electronic annotation /// 0008270 // zinc ion binding // inferred from electronic annotation /// 0046872 // metal ion binding // inferred from electronic annotation	chr16:87164372-87218657 (+) // 86.28 // q24.2
ANKRD11	29123	238538_at	-1.31816		0005634 // nucleus // inferred from electronic annotation		chr16:87861535-87862422 (-) // 90.37 // q24.3 /// chrX:145507948-145508832 (-) // 89.95 // q27.3
ANKRD11	29123	234701_at	-1.7541		0005634 // nucleus // inferred from electronic annotation		chr16:87878563-87885644 (-) // 96.25 // q24.3
ANKRD11	29123	219437_s_at	-1.34717		0005634 // nucleus // inferred from electronic annotation		chr16:87879095-88084227 (-) // 97.19 // q24.3
SPG7	6687	202104_s_at	1.64837	0006508 // proteolysis // traceable author statement /// 0006508 // proteolysis // inferred from electronic annotation /// 0007005 // mitochondrion organization // inferred from electronic annotation /// 0007165 // signal transduction // non-traceable author statement /// 0007399 // nervous system development // traceable author statement /// 0008089 // anterograde axon cargo transport // inferre…	0005739 // mitochondrion // traceable author statement /// 0005739 // mitochondrion // inferred from electronic annotation /// 0016020 // membrane // inferred from electronic annotation /// 0016021 // integral to membrane // inferred from electronic annotation /// 0031966 // mitochondrial membrane // inferred from electronic annotation	0000166 // nucleotide binding // inferred from electronic annotation /// 0004222 // metalloendopeptidase activity // inferred from direct assay /// 0004222 // metalloendopeptidase activity // inferred from electronic annotation /// 0005524 // ATP binding // inferred from electronic annotation /// 0008233 // peptidase activity // traceable author statement /// 0008233 // peptidase activity // infe…	chr16:88102314-88151667 (+) // 97.93 // q24.3
SPG7	6687	230884_s_at	1.88797	0006508 // proteolysis // traceable author statement /// 0006508 // proteolysis // inferred from electronic annotation /// 0007005 // mitochondrion organization // inferred from electronic annotation /// 0007165 // signal transduction // non-traceable author statement /// 0007399 // nervous system development // traceable author statement /// 0008089 // anterograde axon cargo transport // inferre…	0005739 // mitochondrion // traceable author statement /// 0005739 // mitochondrion // inferred from electronic annotation /// 0016020 // membrane // inferred from electronic annotation /// 0016021 // integral to membrane // inferred from electronic annotation /// 0031966 // mitochondrial membrane // inferred from electronic annotation	0000166 // nucleotide binding // inferred from electronic annotation /// 0004222 // metalloendopeptidase activity // inferred from direct assay /// 0004222 // metalloendopeptidase activity // inferred from electronic annotation /// 0005524 // ATP binding // inferred from electronic annotation /// 0008233 // peptidase activity // traceable author statement /// 0008233 // peptidase activity // infe…	chr16:88138143-88142270 (+) // 97.84 // q24.3
SPG7	6687	214494_s_at	1.55455	0006508 // proteolysis // traceable author statement /// 0006508 // proteolysis // inferred from electronic annotation /// 0007005 // mitochondrion organization // inferred from electronic annotation /// 0007165 // signal transduction // non-traceable author statement /// 0007399 // nervous system development // traceable author statement /// 0008089 // anterograde axon cargo transport // inferre…	0005739 // mitochondrion // traceable author statement /// 0005739 // mitochondrion // inferred from electronic annotation /// 0016020 // membrane // inferred from electronic annotation /// 0016021 // integral to membrane // inferred from electronic annotation /// 0031966 // mitochondrial membrane // inferred from electronic annotation	0000166 // nucleotide binding // inferred from electronic annotation /// 0004222 // metalloendopeptidase activity // inferred from direct assay /// 0004222 // metalloendopeptidase activity // inferred from electronic annotation /// 0005524 // ATP binding // inferred from electronic annotation /// 0008233 // peptidase activity // traceable author statement /// 0008233 // peptidase activity // infe…	chr16:88151221-88151667 (+) // 96.75 // q24.3
JOSD2	126119	227096_at	1.37264				chr19:55701070-55706269 (-) // 98.59 // q13.33
LAMA5	3911	229570_at	1.81846	0007155 // cell adhesion // inferred from electronic annotation /// 0030155 // regulation of cell adhesion // inferred from electronic annotation /// 0030334 // regulation of cell migration // inferred from electronic annotation /// 0034446 // substrate adhesion-dependent cell spreading // inferred from direct assay /// 0045995 // regulation of embryonic development // inferred from electronic an…	0005576 // extracellular region // inferred from electronic annotation /// 0005578 // proteinaceous extracellular matrix // inferred from electronic annotation /// 0005604 // basement membrane // inferred from electronic annotation /// 0005606 // laminin-1 complex // inferred from electronic annotation /// 0031012 // extracellular matrix // inferred from electronic annotation /// 0043259 // lamin…	0005102 // receptor binding // inferred from electronic annotation /// 0005198 // structural molecule activity // non-traceable author statement /// 0005515 // protein binding // inferred from electronic annotation	chr20:60394754-60395414 (-) // 75.04 // q13.33
PTK6	5753	206482_at	-3.214	0006468 // protein amino acid phosphorylation // traceable author statement /// 0006468 // protein amino acid phosphorylation // inferred from electronic annotation	0005634 // nucleus // inferred from electronic annotation /// 0005737 // cytoplasm // inferred from electronic annotation	0000166 // nucleotide binding // inferred from electronic annotation /// 0004672 // protein kinase activity // inferred from electronic annotation /// 0004674 // protein serine/threonine kinase activity // inferred from electronic annotation /// 0004713 // protein tyrosine kinase activity // inferred from electronic annotation /// 0004715 // non-membrane spanning protein tyrosine kinase activity …	chr20:61630168-61639924 (-) // 72.02 // q13.33
PTK6	5753	1553114_a_at	-3.79336	0006468 // protein amino acid phosphorylation // traceable author statement /// 0006468 // protein amino acid phosphorylation // inferred from electronic annotation	0005634 // nucleus // inferred from electronic annotation /// 0005737 // cytoplasm // inferred from electronic annotation	0000166 // nucleotide binding // inferred from electronic annotation /// 0004672 // protein kinase activity // inferred from electronic annotation /// 0004674 // protein serine/threonine kinase activity // inferred from electronic annotation /// 0004713 // protein tyrosine kinase activity // inferred from electronic annotation /// 0004715 // non-membrane spanning protein tyrosine kinase activity …	chr20:61630203-61639152 (-) // 69.07 // q13.33
SLC25A1	6576	210010_s_at	1.9486	0006810 // transport // inferred from electronic annotation /// 0006843 // mitochondrial citrate transport // traceable author statement	0005739 // mitochondrion // inferred from electronic annotation /// 0005743 // mitochondrial inner membrane // traceable author statement /// 0005743 // mitochondrial inner membrane // inferred from electronic annotation /// 0016020 // membrane // inferred from electronic annotation /// 0016021 // integral to membrane // inferred from electronic annotation	0005215 // transporter activity // inferred from electronic annotation /// 0005488 // binding // inferred from electronic annotation /// 0005515 // protein binding // inferred from physical interaction /// 0015137 // citrate transmembrane transporter activity // traceable author statement	chr22:17543119-17546260 (-) // 95.24 // q11.21
NIPSNAP1	8508	201708_s_at	1.47367		0005739 // mitochondrion // inferred from sequence or structural similarity /// 0005739 // mitochondrion // inferred from electronic annotation /// 0005743 // mitochondrial inner membrane // inferred from electronic annotation		chr22:28280796-28307328 (-) // 94.64 // q12.2
NIPSNAP1	8508	201709_s_at	1.12895		0005739 // mitochondrion // inferred from sequence or structural similarity /// 0005739 // mitochondrion // inferred from electronic annotation /// 0005743 // mitochondrial inner membrane // inferred from electronic annotation		chr22:28280799-28307328 (-) // 95.43 // q12.2
ZXDC	79364	218639_s_at	-1.75931	0006350 // transcription // inferred from electronic annotation /// 0006355 // regulation of transcription, DNA-dependent // inferred from electronic annotation	0005622 // intracellular // inferred from electronic annotation /// 0005634 // nucleus // inferred from electronic annotation	0003676 // nucleic acid binding // inferred from electronic annotation /// 0005515 // protein binding // inferred from physical interaction /// 0008270 // zinc ion binding // inferred from electronic annotation /// 0042802 // identical protein binding // inferred from physical interaction /// 0046872 // metal ion binding // inferred from electronic annotation	chr3:127639154-127673737 (-) // 98.93 // q21.2
ZXDC	79364	234991_at	-1.15175	0006350 // transcription // inferred from electronic annotation /// 0006355 // regulation of transcription, DNA-dependent // inferred from electronic annotation	0005622 // intracellular // inferred from electronic annotation /// 0005634 // nucleus // inferred from electronic annotation	0003676 // nucleic acid binding // inferred from electronic annotation /// 0005515 // protein binding // inferred from physical interaction /// 0008270 // zinc ion binding // inferred from electronic annotation /// 0042802 // identical protein binding // inferred from physical interaction /// 0046872 // metal ion binding // inferred from electronic annotation	chr3:127655608-127657211 (-) // 33.64 // q21.2
GCSH	2653	213129_s_at	1.40529	0006546 // glycine catabolic process // traceable author statement /// 0006546 // glycine catabolic process // inferred from electronic annotation	0005739 // mitochondrion // traceable author statement /// 0005739 // mitochondrion // inferred from electronic annotation /// 0005960 // glycine cleavage complex // traceable author statement /// 0005960 // glycine cleavage complex // inferred from electronic annotation	0004047 // aminomethyltransferase activity // traceable author statement /// 0031405 // lipoic acid binding // inferred from electronic annotation	chr5:26706346-26706971 (+) // 38.67 // p14.1 /// chr1:166291220-166292356 (-) // 74.26 // q24.2 /// chr16:79673043-79687455 (-) // 98.49 // q23.2 /// chr5:141255374-141256446 (-) // 67.76 // q31.3
GCSH	2653	213133_s_at	1.71022	0006546 // glycine catabolic process // traceable author statement /// 0006546 // glycine catabolic process // inferred from electronic annotation	0005739 // mitochondrion // traceable author statement /// 0005739 // mitochondrion // inferred from electronic annotation /// 0005960 // glycine cleavage complex // traceable author statement /// 0005960 // glycine cleavage complex // inferred from electronic annotation	0004047 // aminomethyltransferase activity // traceable author statement /// 0031405 // lipoic acid binding // inferred from electronic annotation	chr5:26706346-26706971 (+) // 38.67 // p14.1 /// chr1:166291220-166292356 (-) // 74.26 // q24.2 /// chr16:79673043-79687455 (-) // 98.49 // q23.2 /// chr5:141255374-141256446 (-) // 67.76 // q31.3
WRNIP1	56897	230847_at	1.17082	0000731 // DNA synthesis during DNA repair // inferred from direct assay /// 0006260 // DNA replication // inferred from electronic annotation /// 0006281 // DNA repair // inferred from electronic annotation /// 0006974 // response to DNA damage stimulus // inferred from electronic annotation /// 0030174 // regulation of DNA replication initiation // inferred from direct assay	0005634 // nucleus // inferred from sequence or structural similarity /// 0005634 // nucleus // inferred from electronic annotation	0000166 // nucleotide binding // inferred from electronic annotation /// 0003677 // DNA binding // inferred from electronic annotation /// 0004386 // helicase activity // inferred from electronic annotation /// 0005515 // protein binding // inferred from physical interaction /// 0005515 // protein binding // inferred from sequence or structural similarity /// 0005524 // ATP binding // inferred by…	chr6:2724634-2725129 (+) // 77.87 // p25.2
SERPINB9	5272	209723_at	-2.3915	0006916 // anti-apoptosis // traceable author statement /// 0007165 // signal transduction // traceable author statement	0005737 // cytoplasm // traceable author statement /// 0005737 // cytoplasm // inferred from electronic annotation /// 0005829 // cytosol // traceable author statement	0004866 // endopeptidase inhibitor activity // inferred from electronic annotation /// 0004867 // serine-type endopeptidase inhibitor activity // traceable author statement /// 0004867 // serine-type endopeptidase inhibitor activity // inferred from electronic annotation /// 0005515 // protein binding // traceable author statement	chr6:2832504-2848506 (-) // 61.43 // p25.2
SERPINB6	5269	1556950_s_at	-1.56175		0005737 // cytoplasm // inferred from electronic annotation /// 0005737 // cytoplasm // inferred from direct assay /// 0005813 // centrosome // inferred from direct assay /// 0005829 // cytosol // traceable author statement	0004866 // endopeptidase inhibitor activity // inferred from electronic annotation /// 0004867 // serine-type endopeptidase inhibitor activity // traceable author statement /// 0004867 // serine-type endopeptidase inhibitor activity // inferred from electronic annotation /// 0005515 // protein binding // traceable author statement	chr6:2911566-2913802 (-) // 24.79 // p25.2
NQO2	4835	203814_s_at	1.64323	0055114 // oxidation reduction // inferred from electronic annotation	0005737 // cytoplasm // inferred from electronic annotation	0001512 // dihydronicotinamide riboside quinone reductase activity // inferred from electronic annotation /// 0008270 // zinc ion binding // inferred from electronic annotation /// 0008753 // NADPH dehydrogenase (quinone) activity // traceable author statement /// 0009055 // electron carrier activity // traceable author statement /// 0009055 // electron carrier activity // inferred from electroni…	chr6:2945229-2964993 (+) // 99.69 // p25.2
BPHL	670	205750_at	1.22087	0005975 // carbohydrate metabolic process // inferred from electronic annotation /// 0006519 // cellular amino acid and derivative metabolic process // traceable author statement /// 0006974 // response to DNA damage stimulus // inferred from electronic annotation /// 0009636 // response to toxin // traceable author statement /// 0016045 // detection of bacterium // inferred from electronic annot…	0005634 // nucleus // inferred from electronic annotation /// 0005737 // cytoplasm // inferred from electronic annotation /// 0005737 // cytoplasm // traceable author statement /// 0005739 // mitochondrion // inferred from sequence or structural similarity /// 0005829 // cytosol // inferred from electronic annotation	0003824 // catalytic activity // inferred from electronic annotation /// 0004649 // poly(ADP-ribose) glycohydrolase activity // inferred from direct assay /// 0004649 // poly(ADP-ribose) glycohydrolase activity // inferred from electronic annotation /// 0004649 // poly(ADP-ribose) glycohydrolase activity // traceable author statement /// 0016787 // hydrolase activity // inferred from electronic a…	chr6:3064040-3098279 (+) // 71.86 // p25.2
TUBB2A	7280	204141_at	1.42301	0007017 // microtubule-based process // inferred from electronic annotation /// 0007018 // microtubule-based movement // inferred from electronic annotation /// 0051258 // protein polymerization // inferred from electronic annotation	0005874 // microtubule // inferred from electronic annotation /// 0043234 // protein complex // inferred from electronic annotation	0000166 // nucleotide binding // inferred from electronic annotation /// 0003924 // GTPase activity // inferred from electronic annotation /// 0005198 // structural molecule activity // inferred from electronic annotation /// 0005515 // protein binding // inferred from physical interaction /// 0005525 // GTP binding // inferred from electronic annotation	chr6:3098902-3102759 (-) // 99.94 // p25.2 /// chr6:3169987-3171045 (-) // 66.25 // p25.2 /// chr6:3122277-3122875 (-) // 37.01 // p25.2
TUBB2B	347733	214023_x_at	-2.59946	0007017 // microtubule-based process // inferred from electronic annotation /// 0007018 // microtubule-based movement // inferred from electronic annotation /// 0051258 // protein polymerization // inferred from electronic annotation	0005874 // microtubule // inferred from electronic annotation /// 0043234 // protein complex // inferred from electronic annotation	0000166 // nucleotide binding // inferred from electronic annotation /// 0003924 // GTPase activity // inferred from electronic annotation /// 0005198 // structural molecule activity // inferred from electronic annotation /// 0005525 // GTP binding // inferred from electronic annotation	chr6:3169509-3170536 (-) // 97.79 // p25.2 /// chr6:3099099-3099648 (-) // 52.06 // p25.2
PRPF4B	8899	202126_at	1.23944	0006397 // mRNA processing // inferred from electronic annotation /// 0006468 // protein amino acid phosphorylation // traceable author statement /// 0006468 // protein amino acid phosphorylation // inferred from electronic annotation /// 0008380 // RNA splicing // traceable author statement /// 0008380 // RNA splicing // inferred from electronic annotation	0005634 // nucleus // inferred from electronic annotation /// 0005681 // spliceosome // inferred from electronic annotation /// 0005694 // chromosome // inferred from electronic annotation	0000166 // nucleotide binding // inferred from electronic annotation /// 0004672 // protein kinase activity // inferred from electronic annotation /// 0004672 // protein kinase activity // traceable author statement /// 0004674 // protein serine/threonine kinase activity // inferred from electronic annotation /// 0005515 // protein binding // inferred from physical interaction /// 0005524 // ATP …	chr6:3966600-4010216 (+) // 97.69 // p25.2
RPP40	10799	213427_at	1.46784	0008033 // tRNA processing // inferred from electronic annotation	0005634 // nucleus // traceable author statement /// 0005634 // nucleus // inferred from electronic annotation /// 0005655 // nucleolar ribonuclease P complex // traceable author statement	0004526 // ribonuclease P activity // traceable author statement /// 0004526 // ribonuclease P activity // inferred from electronic annotation /// 0005515 // protein binding // inferred from physical interaction /// 0016787 // hydrolase activity // inferred from electronic annotation	chr6:4940278-4949280 (-) // 86.82 // p25.1
LYRM4	57128	218561_s_at	1.85015		0005739 // mitochondrion // inferred from electronic annotation		chr6:5054304-5205978 (-) // 99.69 // p25.1
FARS2	10667	204282_s_at	2.36527	0006412 // translation // inferred from electronic annotation /// 0006418 // tRNA aminoacylation for protein translation // inferred from electronic annotation /// 0006432 // phenylalanyl-tRNA aminoacylation // inferred from direct assay /// 0006432 // phenylalanyl-tRNA aminoacylation // inferred from electronic annotation /// 0008033 // tRNA processing // inferred from direct assay /// 0008033 /…	0005625 // soluble fraction // inferred from direct assay /// 0005737 // cytoplasm // inferred from electronic annotation /// 0005739 // mitochondrion // inferred from electronic annotation /// 0005759 // mitochondrial matrix // inferred from electronic annotation	0000049 // tRNA binding // inferred from direct assay /// 0000049 // tRNA binding // inferred from electronic annotation /// 0000166 // nucleotide binding // inferred from electronic annotation /// 0000287 // magnesium ion binding // inferred from electronic annotation /// 0004812 // aminoacyl-tRNA ligase activity // inferred from electronic annotation /// 0004826 // phenylalanine-tRNA ligase act…	chr6:5313794-5716808 (+) // 97.99 // p25.1
FARS2	10667	204283_at	2.55868	0006412 // translation // inferred from electronic annotation /// 0006418 // tRNA aminoacylation for protein translation // inferred from electronic annotation /// 0006432 // phenylalanyl-tRNA aminoacylation // inferred from direct assay /// 0006432 // phenylalanyl-tRNA aminoacylation // inferred from electronic annotation /// 0008033 // tRNA processing // inferred from direct assay /// 0008033 /…	0005625 // soluble fraction // inferred from direct assay /// 0005737 // cytoplasm // inferred from electronic annotation /// 0005739 // mitochondrion // inferred from electronic annotation /// 0005759 // mitochondrial matrix // inferred from electronic annotation	0000049 // tRNA binding // inferred from direct assay /// 0000049 // tRNA binding // inferred from electronic annotation /// 0000166 // nucleotide binding // inferred from electronic annotation /// 0000287 // magnesium ion binding // inferred from electronic annotation /// 0004812 // aminoacyl-tRNA ligase activity // inferred from electronic annotation /// 0004826 // phenylalanine-tRNA ligase act…	chr6:5313794-5716808 (+) // 97.99 // p25.1
SSR1	6745	225435_at	-1.64006	0006613 // cotranslational protein targeting to membrane // traceable author statement /// 0008284 // positive regulation of cell proliferation // traceable author statement	0005783 // endoplasmic reticulum // traceable author statement /// 0005783 // endoplasmic reticulum // inferred from electronic annotation /// 0005789 // endoplasmic reticulum membrane // inferred from electronic annotation /// 0016020 // membrane // inferred from electronic annotation /// 0016021 // integral to membrane // traceable author statement /// 0016021 // integral to membrane // inferre…	0004872 // receptor activity // inferred from electronic annotation /// 0005048 // signal sequence binding // traceable author statement /// 0005509 // calcium ion binding // inferred from electronic annotation	chr6:7226285-7228502 (-) // 89.99 // p24.3
SSR1	6745	226712_at	-1.58579	0006613 // cotranslational protein targeting to membrane // traceable author statement /// 0008284 // positive regulation of cell proliferation // traceable author statement	0005783 // endoplasmic reticulum // traceable author statement /// 0005783 // endoplasmic reticulum // inferred from electronic annotation /// 0005789 // endoplasmic reticulum membrane // inferred from electronic annotation /// 0016020 // membrane // inferred from electronic annotation /// 0016021 // integral to membrane // traceable author statement /// 0016021 // integral to membrane // inferre…	0004872 // receptor activity // inferred from electronic annotation /// 0005048 // signal sequence binding // traceable author statement /// 0005509 // calcium ion binding // inferred from electronic annotation	chr6:7228292-7231882 (-) // 59.36 // p24.3
INSIG1	3638	201625_s_at	2.83723	0006629 // lipid metabolic process // inferred from electronic annotation /// 0006991 // response to sterol depletion // inferred from electronic annotation /// 0008152 // metabolic process // traceable author statement /// 0008202 // steroid metabolic process // inferred from electronic annotation /// 0008203 // cholesterol metabolic process // inferred from electronic annotation /// 0008283 // …	0005783 // endoplasmic reticulum // inferred from electronic annotation /// 0005789 // endoplasmic reticulum membrane // inferred from electronic annotation /// 0016020 // membrane // inferred from electronic annotation /// 0016021 // integral to membrane // inferred from electronic annotation	0005515 // protein binding // inferred from physical interaction /// 0005515 // protein binding // inferred from electronic annotation	chr7:154720357-154732879 (+) // 92.36 // q36.3
INSIG1	3638	201626_at	2.52088	0006629 // lipid metabolic process // inferred from electronic annotation /// 0006991 // response to sterol depletion // inferred from electronic annotation /// 0008152 // metabolic process // traceable author statement /// 0008202 // steroid metabolic process // inferred from electronic annotation /// 0008203 // cholesterol metabolic process // inferred from electronic annotation /// 0008283 // …	0005783 // endoplasmic reticulum // inferred from electronic annotation /// 0005789 // endoplasmic reticulum membrane // inferred from electronic annotation /// 0016020 // membrane // inferred from electronic annotation /// 0016021 // integral to membrane // inferred from electronic annotation	0005515 // protein binding // inferred from physical interaction /// 0005515 // protein binding // inferred from electronic annotation	chr7:154720357-154732879 (+) // 92.36 // q36.3
INSIG1	3638	201627_s_at	2.67063	0006629 // lipid metabolic process // inferred from electronic annotation /// 0006991 // response to sterol depletion // inferred from electronic annotation /// 0008152 // metabolic process // traceable author statement /// 0008202 // steroid metabolic process // inferred from electronic annotation /// 0008203 // cholesterol metabolic process // inferred from electronic annotation /// 0008283 // …	0005783 // endoplasmic reticulum // inferred from electronic annotation /// 0005789 // endoplasmic reticulum membrane // inferred from electronic annotation /// 0016020 // membrane // inferred from electronic annotation /// 0016021 // integral to membrane // inferred from electronic annotation	0005515 // protein binding // inferred from physical interaction /// 0005515 // protein binding // inferred from electronic annotation	chr7:154720513-154732179 (+) // 94.16 // q36.3
PDGFA	5154	205463_s_at	-2.05965	0001775 // cell activation // traceable author statement /// 0007267 // cell-cell signaling // traceable author statement /// 0008283 // cell proliferation // inferred from electronic annotation /// 0008284 // positive regulation of cell proliferation // inferred from direct assay /// 0009611 // response to wounding // inferred from direct assay /// 0009790 // embryonic development // traceable a…	0005576 // extracellular region // not recorded /// 0005576 // extracellular region // inferred from electronic annotation /// 0005615 // extracellular space // inferred from direct assay /// 0009986 // cell surface // inferred from direct assay /// 0016020 // membrane // inferred from electronic annotation /// 0031089 // platelet dense granule lumen // not recorded	0005161 // platelet-derived growth factor receptor binding // inferred from direct assay /// 0005161 // platelet-derived growth factor receptor binding // inferred from physical interaction /// 0005518 // collagen binding // inferred from direct assay /// 0008083 // growth factor activity // inferred from electronic annotation /// 0042803 // protein homodimerization activity // inferred from dire…	chr7:503424-525572 (-) // 90.76 // p22.3 /// chr7_random:442346-443656 (-) // 47.68 //
WIPI2	26100	226986_at	-1.25761		0043234 // protein complex // inferred from direct assay		chr7:5238091-5239978 (+) // 85.82 // p22.1
LAT2	7462	221581_s_at	-4.12271	0006955 // immune response // inferred from electronic annotation /// 0007242 // intracellular signaling cascade // inferred from genetic interaction /// 0019722 // calcium-mediated signaling // inferred from genetic interaction /// 0042113 // B cell activation // inferred from direct assay /// 0042113 // B cell activation // traceable author statement /// 0043303 // mast cell degranulation // in…	0005886 // plasma membrane // inferred from electronic annotation /// 0016020 // membrane // inferred from electronic annotation /// 0016021 // integral to membrane // inferred from electronic annotation /// 0045121 // membrane raft // inferred from direct assay	0005515 // protein binding // inferred from physical interaction /// 0042169 // SH2 domain binding // inferred from mutant phenotype	chr7:73268210-73282054 (+) // 99.94 // q11.23
RFC2	5982	1053_at	2.52402	0006260 // DNA replication // not recorded /// 0006260 // DNA replication // inferred from electronic annotation /// 0006297 // nucleotide-excision repair, DNA gap filling // not recorded	0005634 // nucleus // inferred from electronic annotation /// 0005654 // nucleoplasm // not recorded /// 0005663 // DNA replication factor C complex // inferred from direct assay /// 0005663 // DNA replication factor C complex // inferred from electronic annotation	0000166 // nucleotide binding // inferred from electronic annotation /// 0003677 // DNA binding // inferred from electronic annotation /// 0003689 // DNA clamp loader activity // inferred from electronic annotation /// 0005515 // protein binding // inferred from physical interaction /// 0005524 // ATP binding // traceable author statement /// 0005524 // ATP binding // inferred from electronic ann…	chr7:73283938-73306668 (-) // 70.86 // q11.23
RFC2	5982	203696_s_at	2.47632	0006260 // DNA replication // not recorded /// 0006260 // DNA replication // inferred from electronic annotation /// 0006297 // nucleotide-excision repair, DNA gap filling // not recorded	0005634 // nucleus // inferred from electronic annotation /// 0005654 // nucleoplasm // not recorded /// 0005663 // DNA replication factor C complex // inferred from direct assay /// 0005663 // DNA replication factor C complex // inferred from electronic annotation	0000166 // nucleotide binding // inferred from electronic annotation /// 0003677 // DNA binding // inferred from electronic annotation /// 0003689 // DNA clamp loader activity // inferred from electronic annotation /// 0005515 // protein binding // inferred from physical interaction /// 0005524 // ATP binding // traceable author statement /// 0005524 // ATP binding // inferred from electronic ann…	chr7:73283938-73306668 (-) // 70.86 // q11.23
HEATR2	54919	1554761_a_at	1.34728			0005488 // binding // inferred from electronic annotation /// 0005515 // protein binding // inferred from physical interaction	chr7:762950-786307 (+) // 88.51 // p22.3
C7orf20	51608	224816_at	-2.53343			0005515 // protein binding // inferred from physical interaction	chr7:891181-902596 (-) // 95.51 // p22.3
BUD31	8896	205690_s_at	-1.01279	0006357 // regulation of transcription from RNA polymerase II promoter // traceable author statement	0005634 // nucleus // traceable author statement /// 0005634 // nucleus // inferred from electronic annotation	0003700 // transcription factor activity // traceable author statement /// 0008270 // zinc ion binding // inferred from electronic annotation /// 0046872 // metal ion binding // inferred from electronic annotation	chr7:98844603-98855174 (+) // 81.46 // q22.1
ATP5J2	9551	202961_s_at	1.11973	0006754 // ATP biosynthetic process // inferred from electronic annotation /// 0006810 // transport // inferred from electronic annotation /// 0006811 // ion transport // inferred from electronic annotation /// 0015992 // proton transport // non-traceable author statement /// 0015992 // proton transport // inferred from electronic annotation	0005739 // mitochondrion // inferred from electronic annotation /// 0005743 // mitochondrial inner membrane // inferred from electronic annotation /// 0005753 // mitochondrial proton-transporting ATP synthase complex // inferred from direct assay /// 0005753 // mitochondrial proton-transporting ATP synthase complex // non-traceable author statement /// 0016020 // membrane // inferred from electro…	0015078 // hydrogen ion transmembrane transporter activity // inferred from electronic annotation /// 0016887 // ATPase activity // inferred from direct assay	chr7:98893754-98901726 (-) // 97.79 // q22.1
