# Supplementary material for: Molecular Mechanisms of Bortezomib Resistant Adenocarcinoma Cells
Source: PLoS One. 2011 Dec 22;6(12):e27996. doi: 10.1371/journal.pone.0027996 (PMC3245226; doi:10.1371/journal.pone.0027996)
Supplement: Table S7 — Summary of Tables S3, S4, S5, S6. (XLSX) [file pone.0027996.s012.xlsx]

## Sheet: Table S7
	Table S7. Summary of supplemental tables 3-6
	Gene Amplifications								Gene Deletions
	Name	BR100	BR200						Name
				Transcription/translation proteins						BR100	BR200	Transcription/Translation proteins
	FOXL1	X	X	Forkhead-related transcription factor 7					MSL2		X	component of histone acetyltransferase complex
	ZC3H18	X	X	Zinc finger CCCH domain-containing protein 18					ZBTB38	X	X	nucleic acid zinc ion binding
	ANKRD11	X	X	HDAC recruitment					TFDP2	X	X	component of the E2F transcription complex
	NIPSNAP1	X	X	Protein NipSnap homolog 1, acetylation					XRN1	X	X	5'-3' exoribonuclease
	ZXDC	X	X	Zinc finger protein ZXDC					CCNL1	X	X	regulator of RNA polymerase II
	BUD31	X	X	transcription factor for RNA pol II promoter					GFM1		X	mitochondrial translational elongation
	ADAT1	X	X	tRNA-specific adenosine deaminase 1					SMC4	X		condensin, turns mitotic to dense chromatin in interphase
	WRNIP1	X	X	ATPase, DNA synthesis					ZNF639	X	X	transcription
	PRPF4B	X	X	Ser/Thr-protein kinase, mRNA processing					FXR1	X	X	RNA-binding, differentiation
	RPP40	X	X	RNase P, generates mature tRNA molecules					POLR2H	X	X	RNA polymerase subunit
	FARS2	X	X	Phenylalanyl-tRNA synthetase, mitochondrial					YEATS2	X	X	transcriptional regulation
				Enzymes, Proteases, Endogeneous inhibitors					ETV5	X	X	transcription factor
	LOXL1	X	X	Lysyl oxidase homolog 1					TTC14	X		RNA binding
	CTSH	X	X	cathepsin H					GLIS3	X	X	transcription negative regulator
	MAN2A2	X		Alpha-mannosidase 2x								Enzymes, proteases, endogeneous inhibitors
	MLKL	X	X	Mixed lineage kinase domain-like protein					ACAD11			acylCoA dehydrogenase family
	SPG7	X	X	Paraplegin, zinc metallo protease					ACPL2	X	X	acid phosphatase-like protein 2
	GCSH	X	X	Glycine cleavage, mitochondrial					LIPH	X	X	lipase
	SERPINB9	X	X	Peptidase inhibitor 9 of granzyme B					ALG3			mannosyl transferase
	SERPINB6	X		Peptidase inhibitor 6 of cat G, kal 8, thrombin					SRD5A1	X	X	converts testosterone into progesterone or cortisone
	LYRM4	X	X	LYR protein 4, iron-sulfur cluster biosynthesis					ECE2		X	endothelian converting enzyme
	ATP5J2	X		ATP synthase subunit f, mitochondrial					ST6GAL1		X	transfers sialic acid
				Transport/membrane protein								Transproters/membrane proteins
	CRISPLD2	X	X	Cysteine-rich secretory protein					SLC25A36	X	X	transmembrane transport
	SLC7A5	X	X	Large neutral amino acids transporter					SLC33A1	X	X	acetyl CoA transporter 1
	SLC25A1	X	X	mitochondrial, transports NAD+ for glycolysis					TRIM59	X	X	membrane protein, protein zinc ion binding
				Signaling/differentiation/proliferation					ATP11B	X	X	phospholipid translocating ATPase
	STRA6	X	X	Stim by retinoic acid, upreg by Wnt defects					LAMP3	X	X	lysosome associated glycoprotein membrane 3
	KLHDC4	X	X	Kelch protein 4, phosphoprotein					KLHL24	X	X	modulates GluR6
	COX4NB	X		Neighbor COX4, phosphoprotein in mito/nuc					ARL14	X		ADP-ribosylation factor, Arf family, small GTPase
	INSIG1	X	X	Insulin-induced protein, cholesterol synth reg					ABCF3	X	X	ABC transporter, lacks TMs, probably not a transporter
	PDGFA	X	X	Platelet-derived growth factor subunit A					TMEM41A	X	X	membrane protein
	LAT2	X	X	Linker for activation of B-cells					VPS8	X	X	vacuolar protein sorting
	WDR61	X	X	meiotic recombination					KPNA4	X	X	nuclear protein import
	WDR59	X	X	WD repeat-containing protein 59								Signaling/differentiation/proliferation
	CENPN	X	X	Interphase centromere complex protein 32					SRPRB	X	X	signal recognition particle receptor (GTPase)
	MPHOSPH6	X	X	M-phase phosphoprotein 6					IL20RB	X	X	interleukin 20 receptor, proliferation
	CFDP1	X	X	Craniofacial development protein 1					DVL3	X	X	wnt signaling
	FBXO31	X		F-box only protein 31, cyclin D1 regulator					TMEM22	X	X	transmembrane protein 22, proliferation
	LAMA5	X		Laminin subunit, develop attach and move					RARRES1	X	X	membrane protein, negative regulator of proliferation
	RFC2	X	X	Replication factor C subunit 2					MLF1	X	X	limits erythroid formation and enhances myeloid formation
				Cytoskeleton/interacting or adhesion protein								Cytoskeleton/interacting or adhesion protein
	MAP1LC3B	X	X	Microtubule-associated protein					NPHP3	X	X	nephrocystin 3 (associates with tubulin)
	TUBB2A	X	X	tubulin beta 2A chain					AMOTL2	X	X	angiomotin-like protein 2, inhibits endothelium formation
	TUBB2B	X	X	tubulin beta 2B chain					AP2M1	X	X	adaptor protein complex 2
	HEATR2	X		HEAT repeat-containing protein 2					TBCCD1		X	binding
	PABPN1	X	X	Polyadenylate-binding protein 2					LPP	X	X	cell adhesion
	COMMD4	X	X	COMM domain-containing protein 4, binding								Proteasome and Cell Stress
	COTL1	X	X	Coactosin-like protein, binding					UBA5		X	ubiquitin-like modifier activating enzyme
	CLEC3A	X	X	C-type lectin domain family 3, sugar binding					SENP2	X	X	protease that processes and deconjugates SUMO 1-3
	DBNDD1		X	Dysbindin domain-containing protein 1					DNAJC19	X	X	DNAJ (HSP40) homolog
	JOSD2	X		Josephin domain-containing protein 2					EIF4G1	X	X	eukaryotic translation initiation factor 4
				Proteasome and Cell stress					EIF4A2	X	X	eukaryotic translation initiation factor 4
	UBL7		X	Bone marrow stromal cell ub-like protein					BCL6	X		transcriptional repressor, pro-apoptotic
	HSBP1	X	X	negative regulator of HSP70					PIK3CA	X	X	Phosphoinosotide 3 Kinase subunit A
	WIPI2	X		early component of autophagy					PIK3CB	X	X	Phosphoinosotide 3 Kinase subunit B
	WWOX	X	X	oxidoreductase, stress pathway					PARL	X	X	Presenilins-associated rhomboid-like protein, prosurvival
	PTK6	X	X	Protein-tyrosine kinase 6, tumor supressor					SSR3	X	X	Translocon associated protein (TRAP), regulates ER residents
	NQO2	X	X	Quinone reductase 2, detox pathway					ZMAT3	X	X	target gene of p53, mediates apoptosis
	BPHL	X	X	Biphenyl hydrolase, serine hydrolase, detox					IGF2BP2	X	X	insulin-like growth factor 2
	PECI		X	Peroxisomal 3,2-trans-enoyl-CoA isomerase					DNAJB11	X	X	co-chaperone for HSPA5, ERAD pathway
	SSR1	X	X	Translocon-assoc, retention of ER resident proteins								Other
	C7orf20	X	X	Golgi to ER traffic protein, transmembrane					CDV3		X
				Other					ARMC8	X	X	armadillo repeat containing 8
									FAM131A	X	X	secreted protein
